# Supplementary material for: Synthesis of Tetrasubstituted Phosphorus Analogs of Aspartic Acid as Antiproliferative Agents
Source: MDPI journal article supplement (doi:10.3390/molecules27228024), 2022-11-18

## Supporting Information

# Synthesis of Tetrasubstituted Phosphorus Analogs of Aspartic Acid as Antiproliferative Agents

Xabier del Corte <sup>†</sup>, Aitor Maestro <sup>†</sup>, Adrián López-Francés, Francisco Palacios and Javier Vicario <sup>\*</sup>

Departamento de Química Orgánica I, Centro de Investigación y Estudios Avanzados "Lucio Lascaray", Facultad de Farmacia, University of the Basque Country, UPV/EHU Paseo de la Universidad 7, 01006 Vitoria-Gasteiz, Spain

<sup>\*</sup> Correspondence: javier.vicario@ehu.eus; Tel.: +34 945013891.

<sup>†</sup> These authors contributed equally to this work.

|                                                                                                                                                  |     |
|--------------------------------------------------------------------------------------------------------------------------------------------------|-----|
| 1. <sup>1</sup> H NMR and <sup>13</sup> C NMR spectra of compounds <b>5</b> and <b>6</b>                                                         | S2  |
| 2. <sup>1</sup> H NMR, <sup>13</sup> C NMR, <sup>31</sup> P NMR and <sup>19</sup> F NMR spectra of compounds <b>7</b>                            | S4  |
| 3. <sup>1</sup> H NMR, <sup>13</sup> C NMR, <sup>31</sup> P NMR and <sup>19</sup> F NMR spectra of compounds <b>12</b> , <b>13</b> and <b>14</b> | S42 |
| 4. <sup>1</sup> H NMR, <sup>13</sup> C NMR and <sup>31</sup> P NMR spectra of compound <b>18</b>                                                 | S50 |
| 5. 2D NMR spectra of compound <b>7a</b>                                                                                                          | S52 |

## 1. $^1\text{H}$ NMR and $^{13}\text{C}$ NMR spectra of compounds 5 and 6

Ethyl 3-((4-methylphenyl)sulfonamido)-3-phenylpropanoate (5).

$^1\text{H}$  NMR (400 MHz,  $\text{CDCl}_3$ )

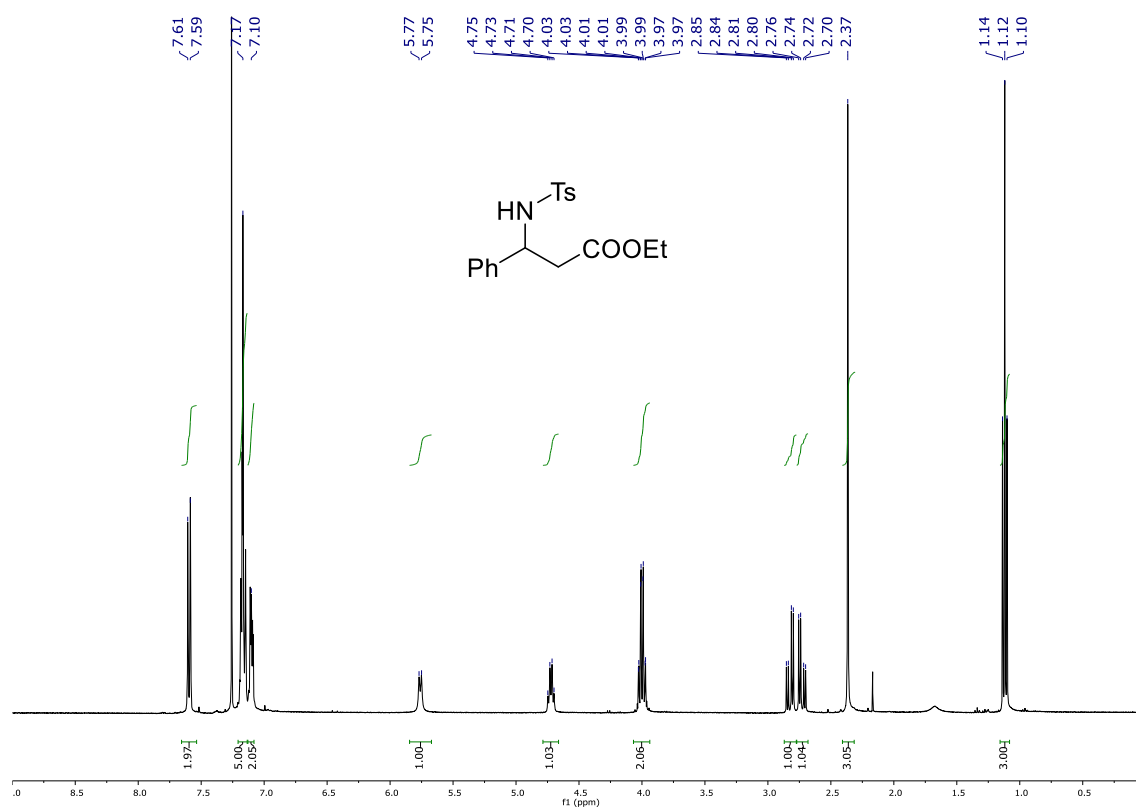

$^{13}\text{C}$  NMR  $\{^1\text{H}\}$  (101 MHz,  $\text{CDCl}_3$ )

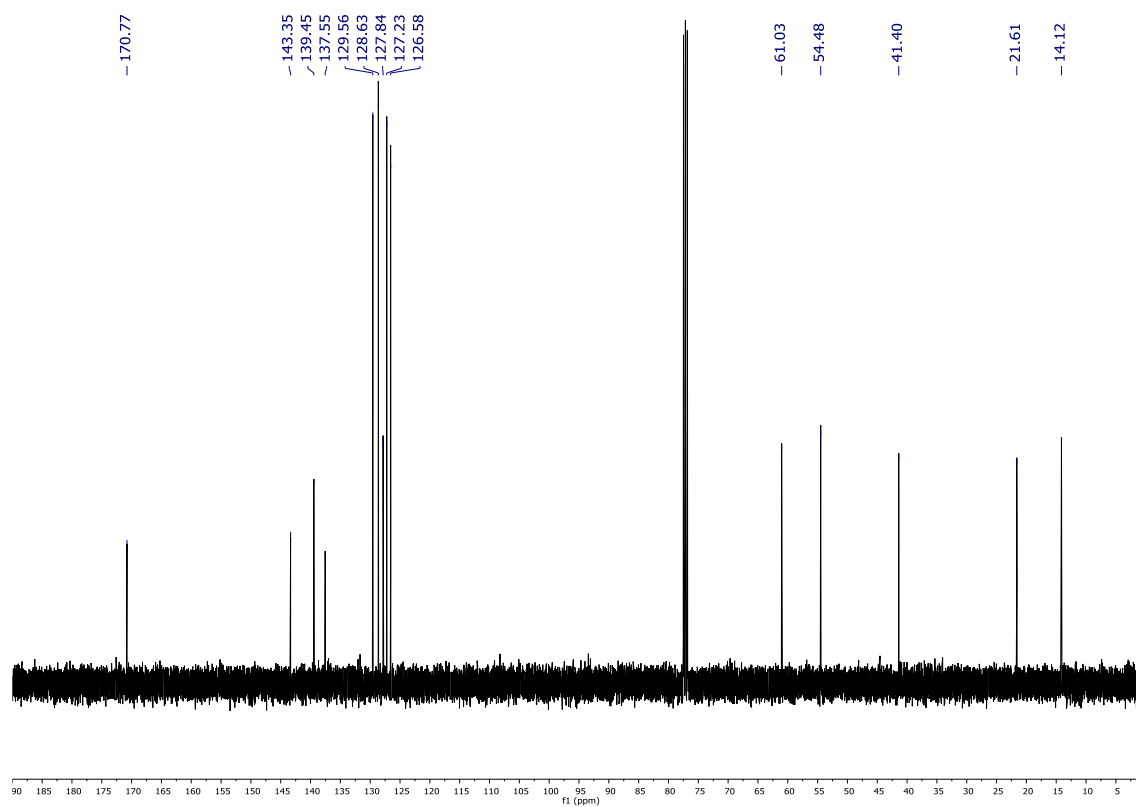

Diethyl 2-((4-methylphenyl)sulfonamido)-2-phenylsuccinate (6).

$^1\text{H}$  NMR (400 MHz,  $\text{CDCl}_3$ )

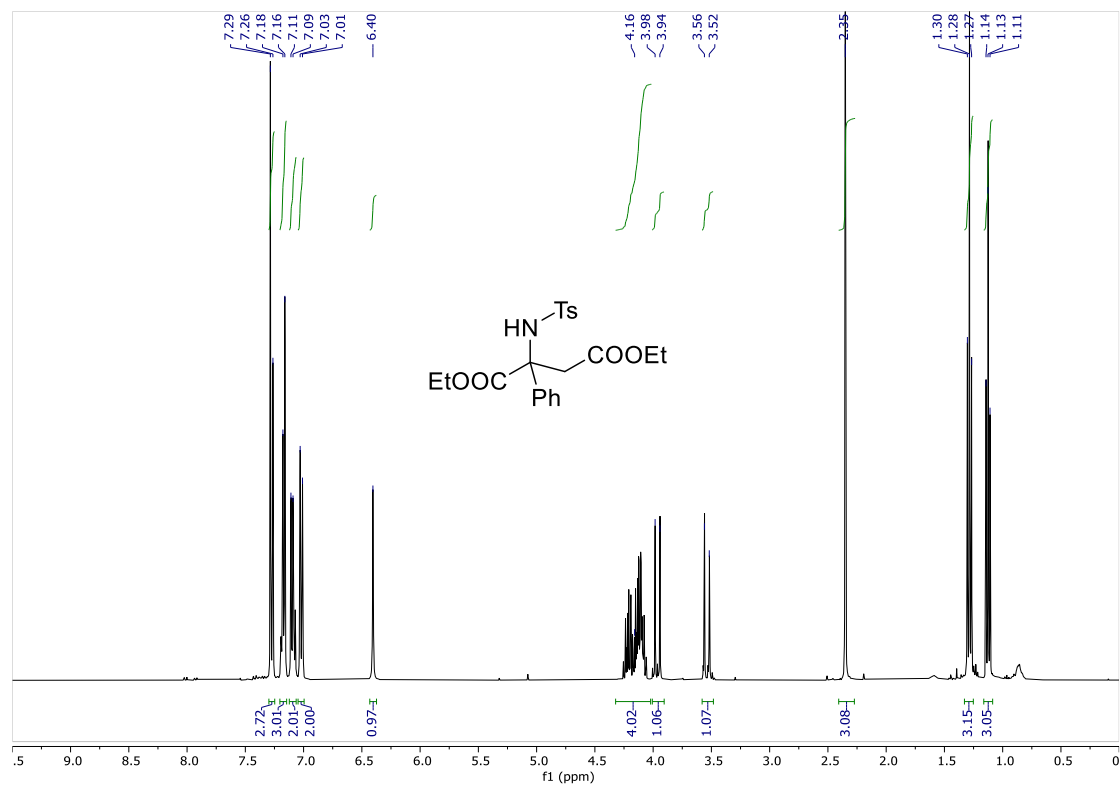

$^{13}\text{C}$  NMR  $\{^1\text{H}\}$  (101 MHz,  $\text{CDCl}_3$ )

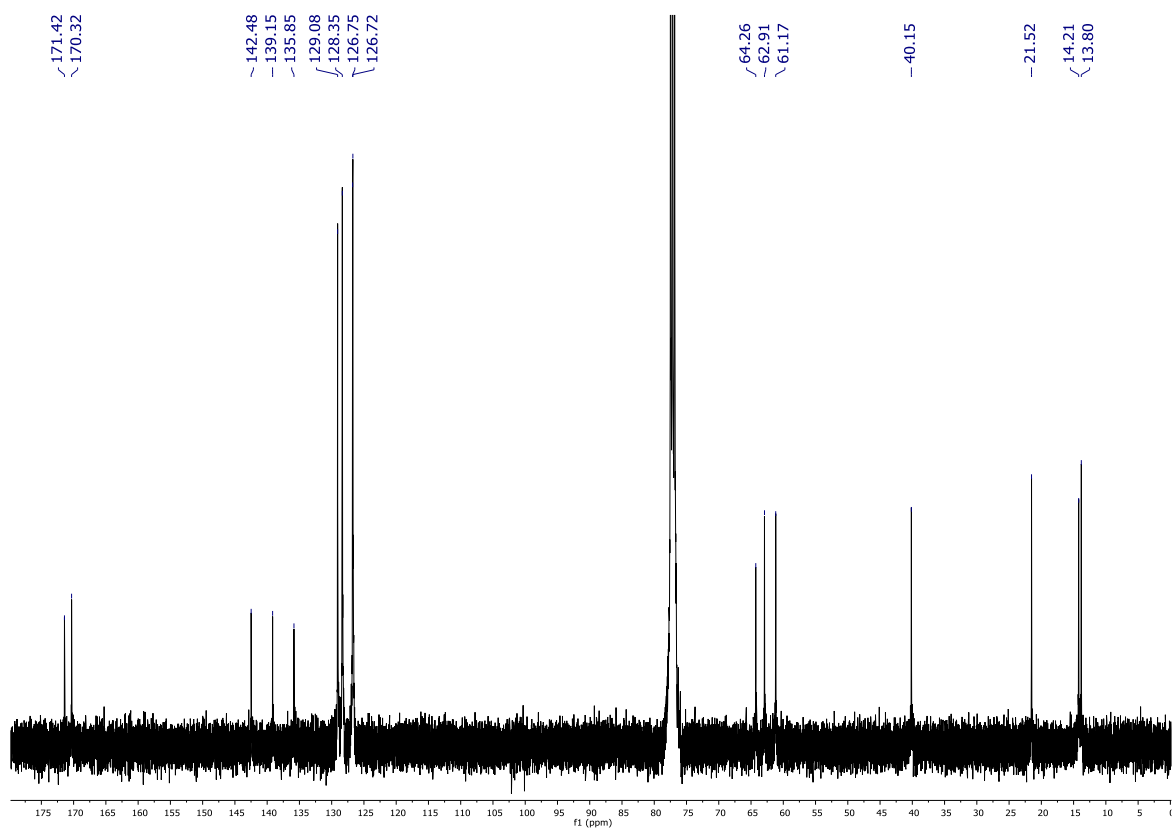

## 2. $^1\text{H}$ NMR, $^{13}\text{C}$ NMR, $^{31}\text{P}$ NMR and $^{19}\text{F}$ NMR spectra of compounds 7

### Ethyl 3-(dimethoxyphosphoryl)-3-((4-methylphenyl)sulfonamido)-3-phenylpropanoate (7a)

$^1\text{H}$  NMR (400 MHz,  $\text{CDCl}_3$ )

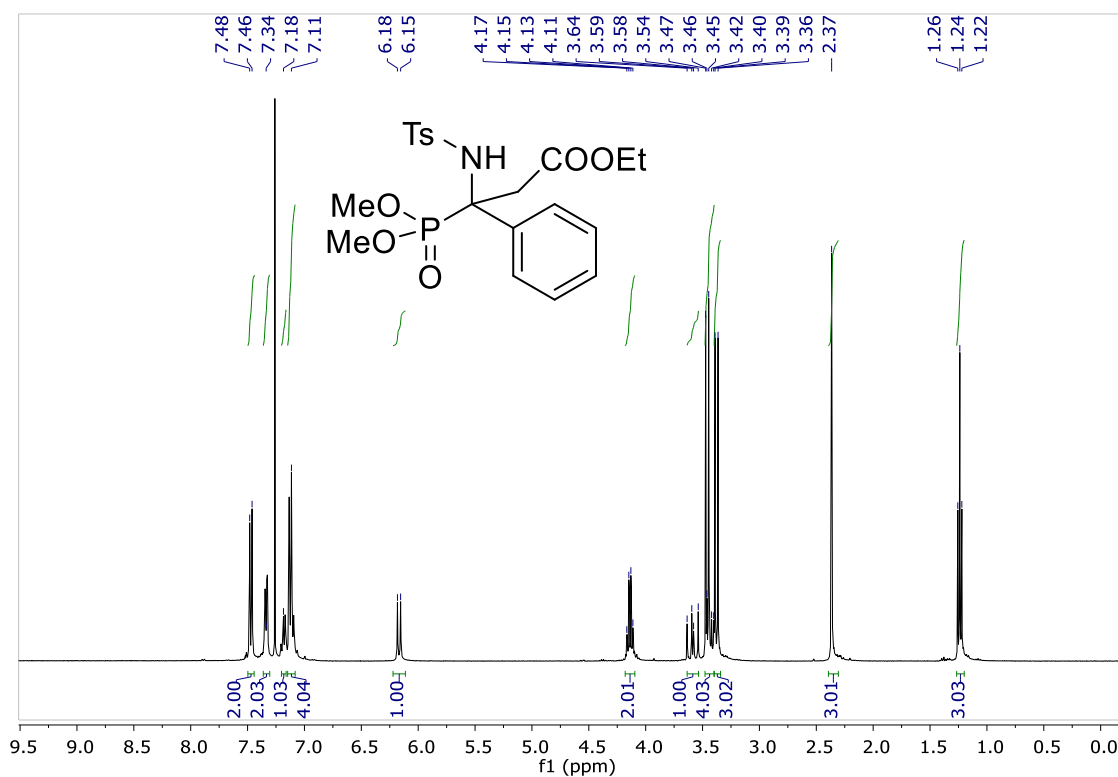

$^{13}\text{C}$  NMR  $\{^1\text{H}\}$  (101 MHz,  $\text{CDCl}_3$ )

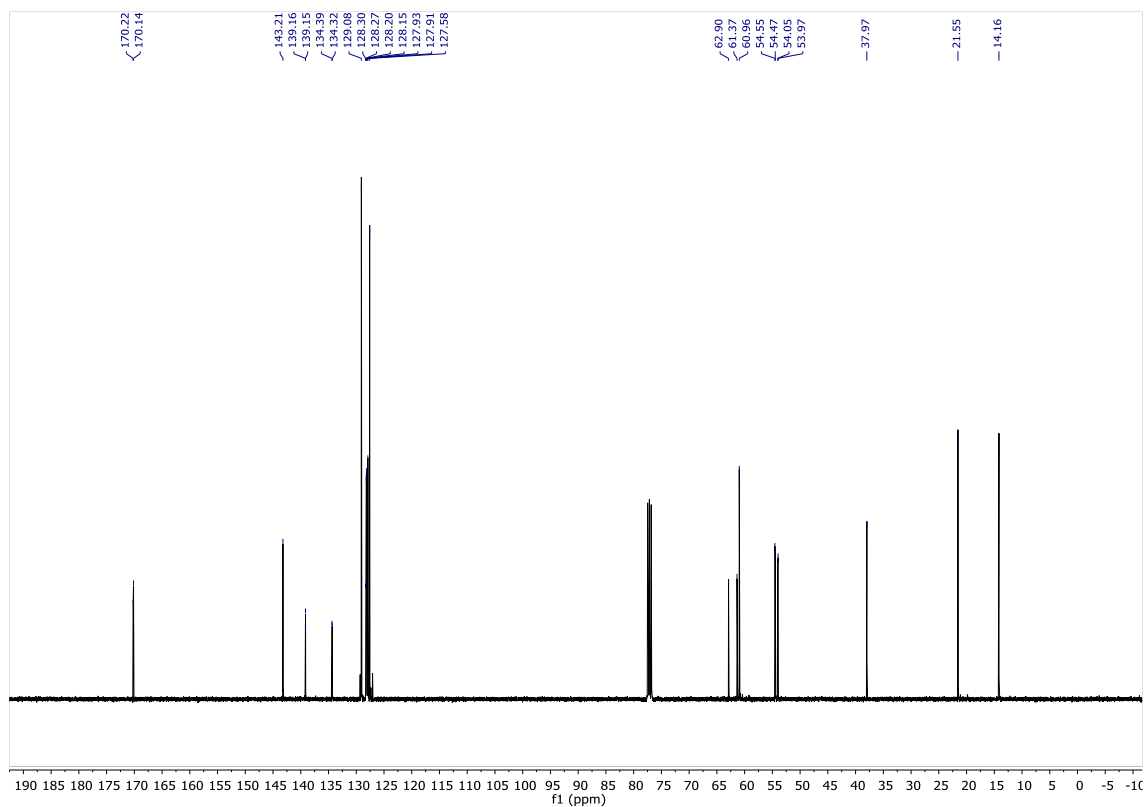

$^{31}\text{P}$  NMR (120 MHz,  $\text{CDCl}_3$ )

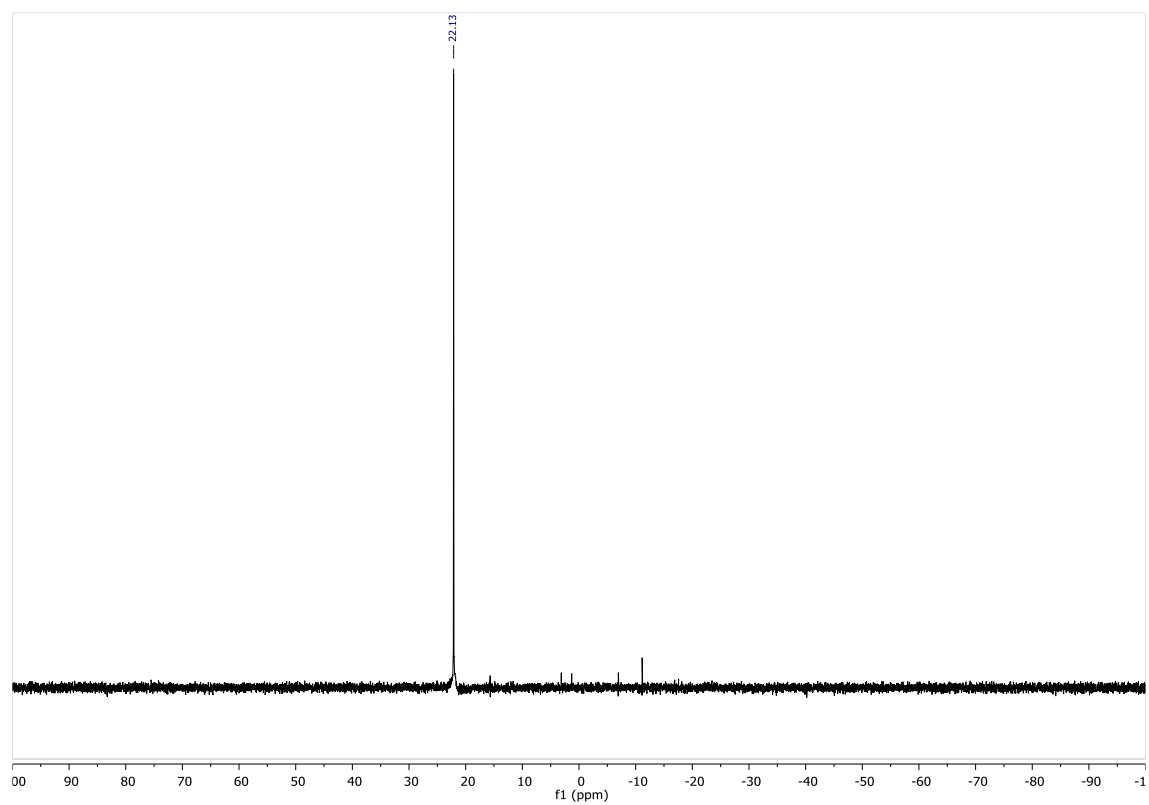

**Ethyl 3-(dimethoxyphosphoryl)-3-((4-methylphenyl)sulfonamido)-3-(p-tolyl)propanoate (7b)**

$^1\text{H}$  NMR (400 MHz,  $\text{CDCl}_3$ )

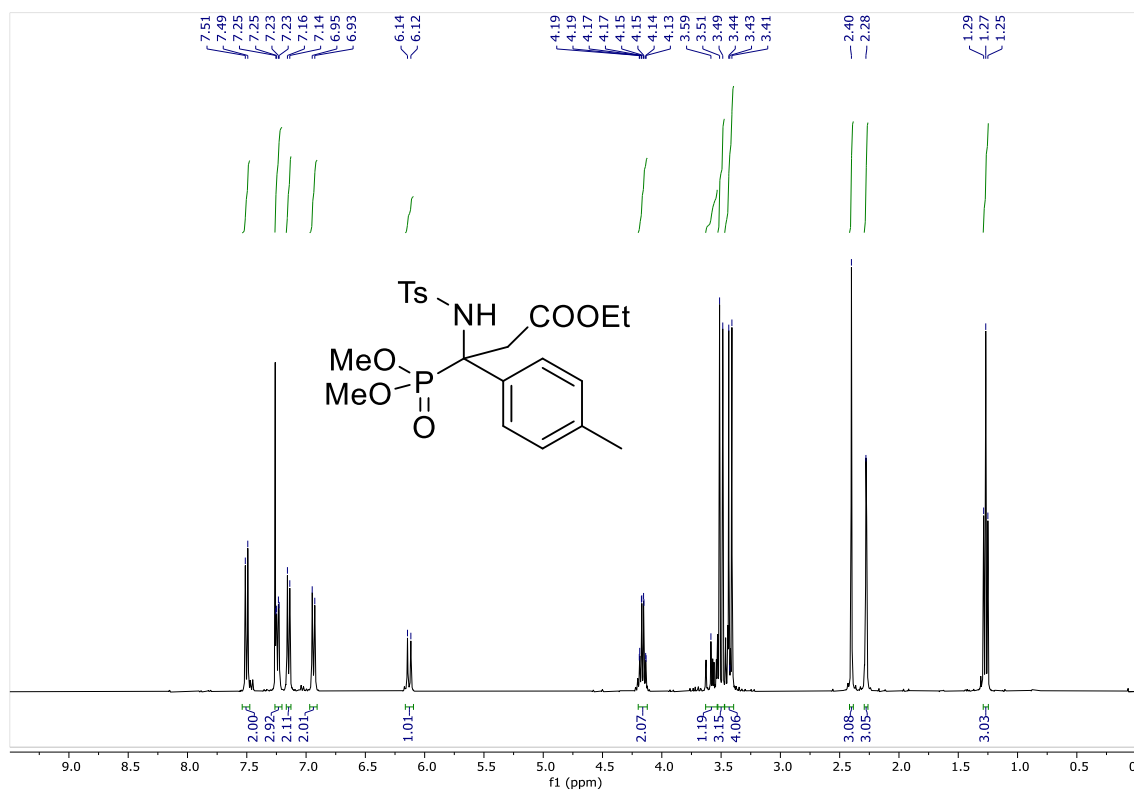

$^{13}\text{C}$  NMR [ $^1\text{H}$ ] (75 MHz,  $\text{CDCl}_3$ )

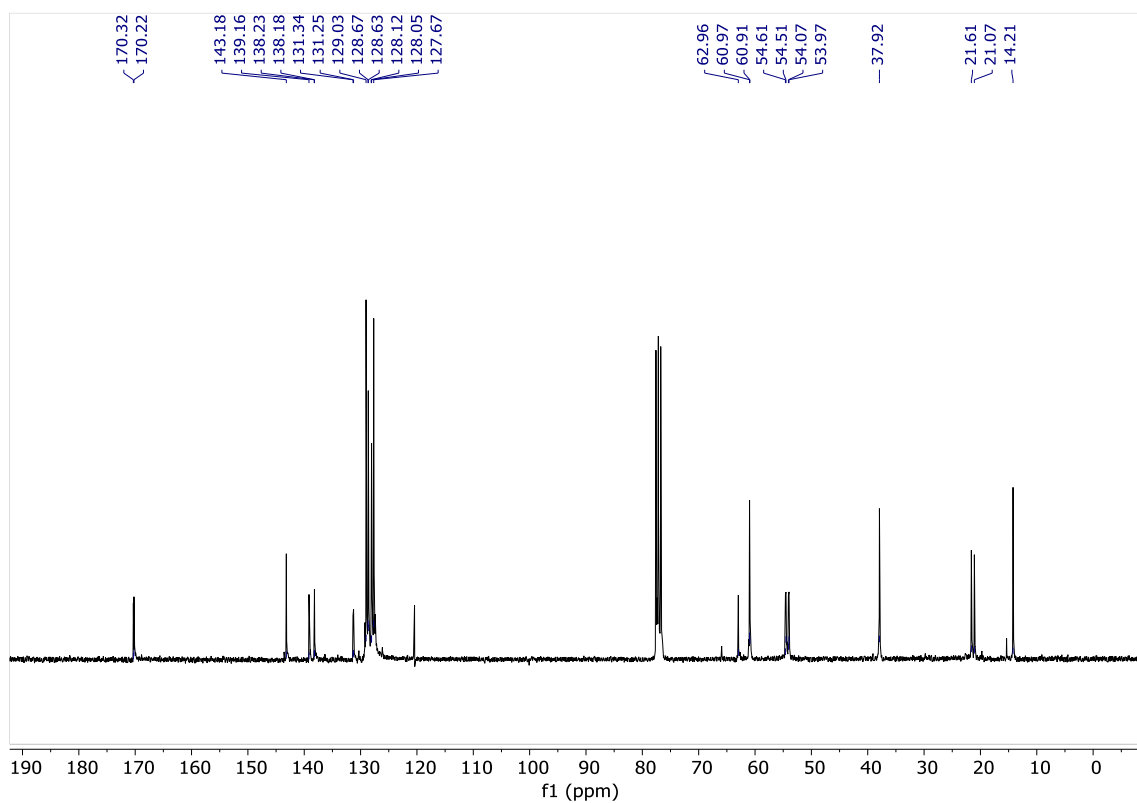

$^{31}\text{P}$  NMR (120 MHz,  $\text{CDCl}_3$ )

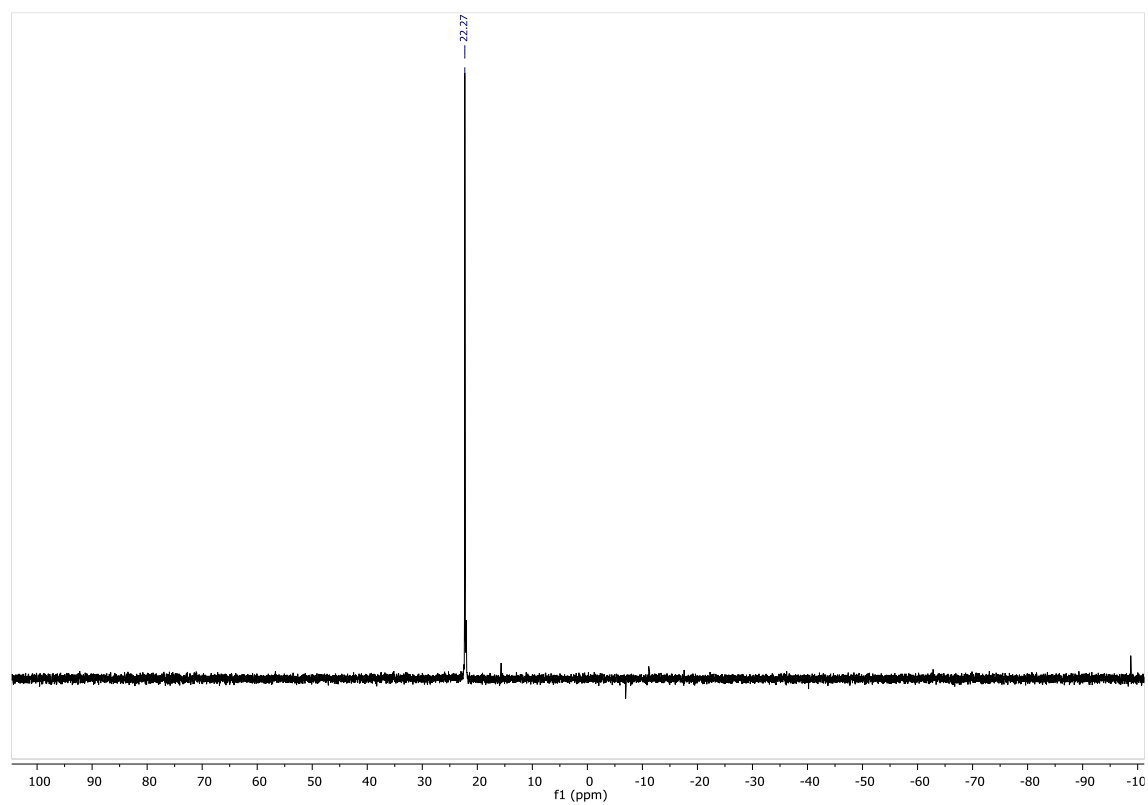

Ethyl 3-(dimethoxyphosphoryl)-3-((4-methylphenyl)sulfonamido)-3-(m-tolyl)propanoate (7c)

$^1\text{H}$  NMR (400 MHz,  $\text{CDCl}_3$ )

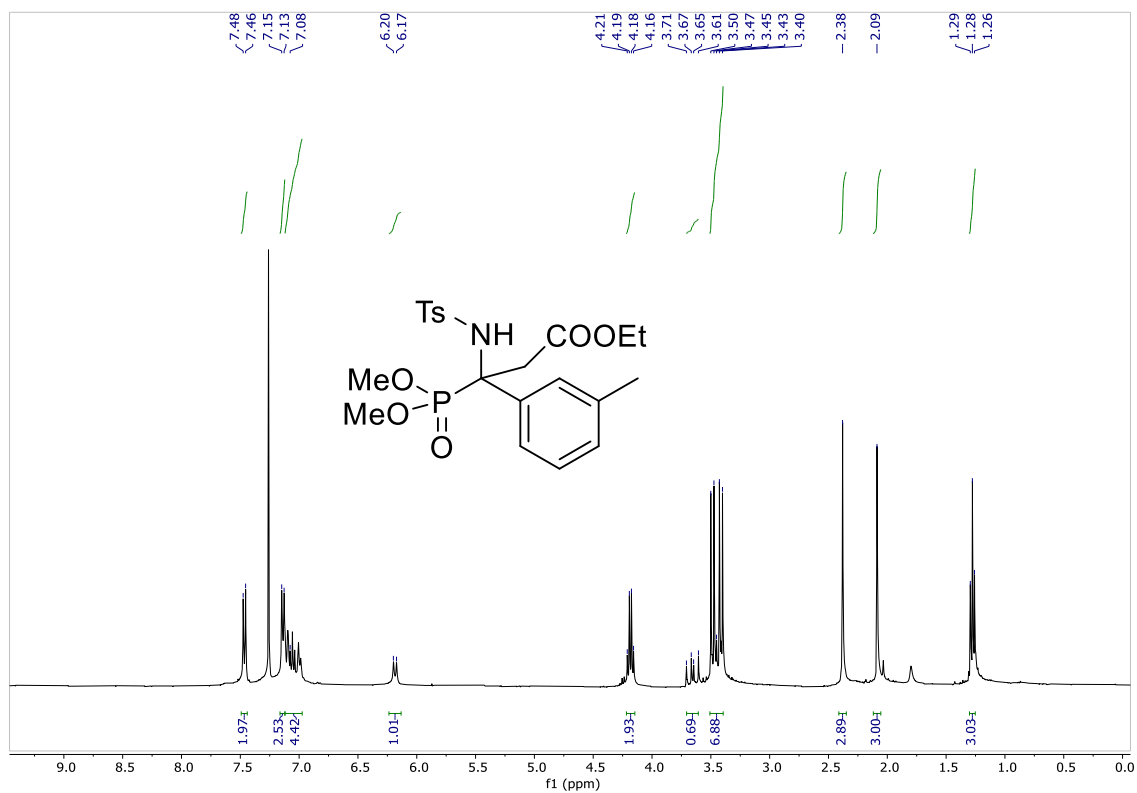

$^{13}\text{C}$  NMR  $\{^1\text{H}\}$  (101 MHz,  $\text{CDCl}_3$ )

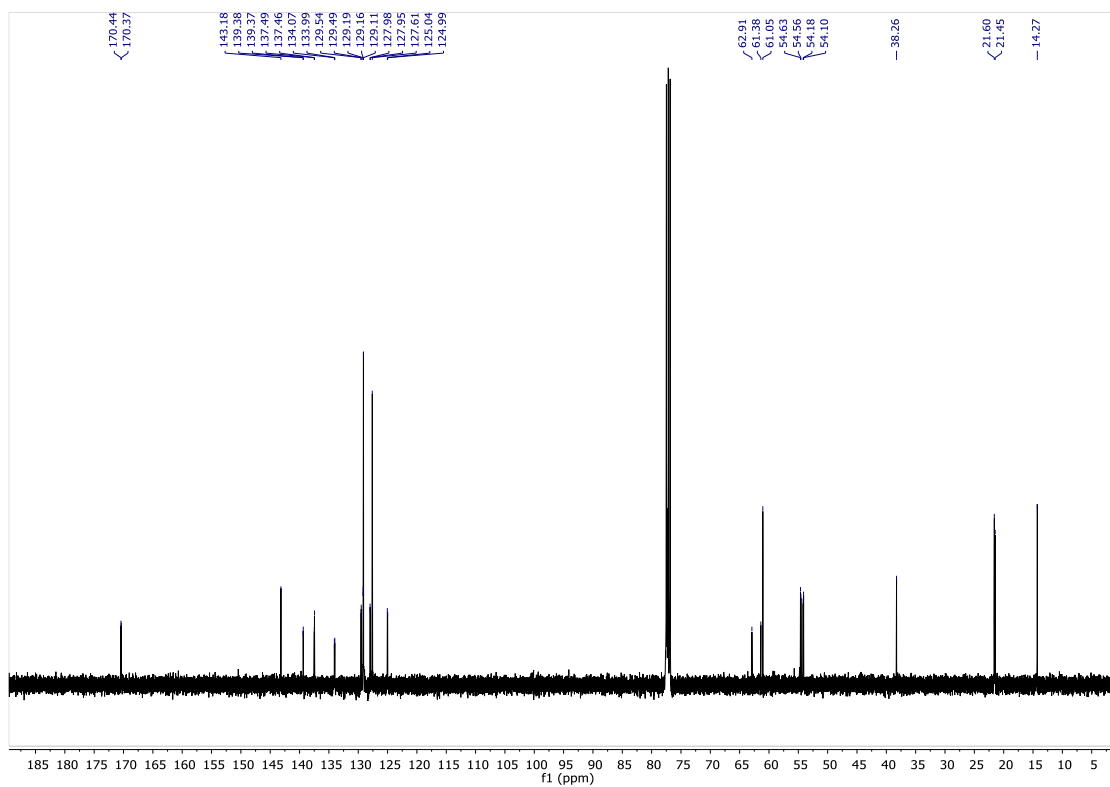



$^{31}\text{P}$  NMR (120 MHz,  $\text{CDCl}_3$ )

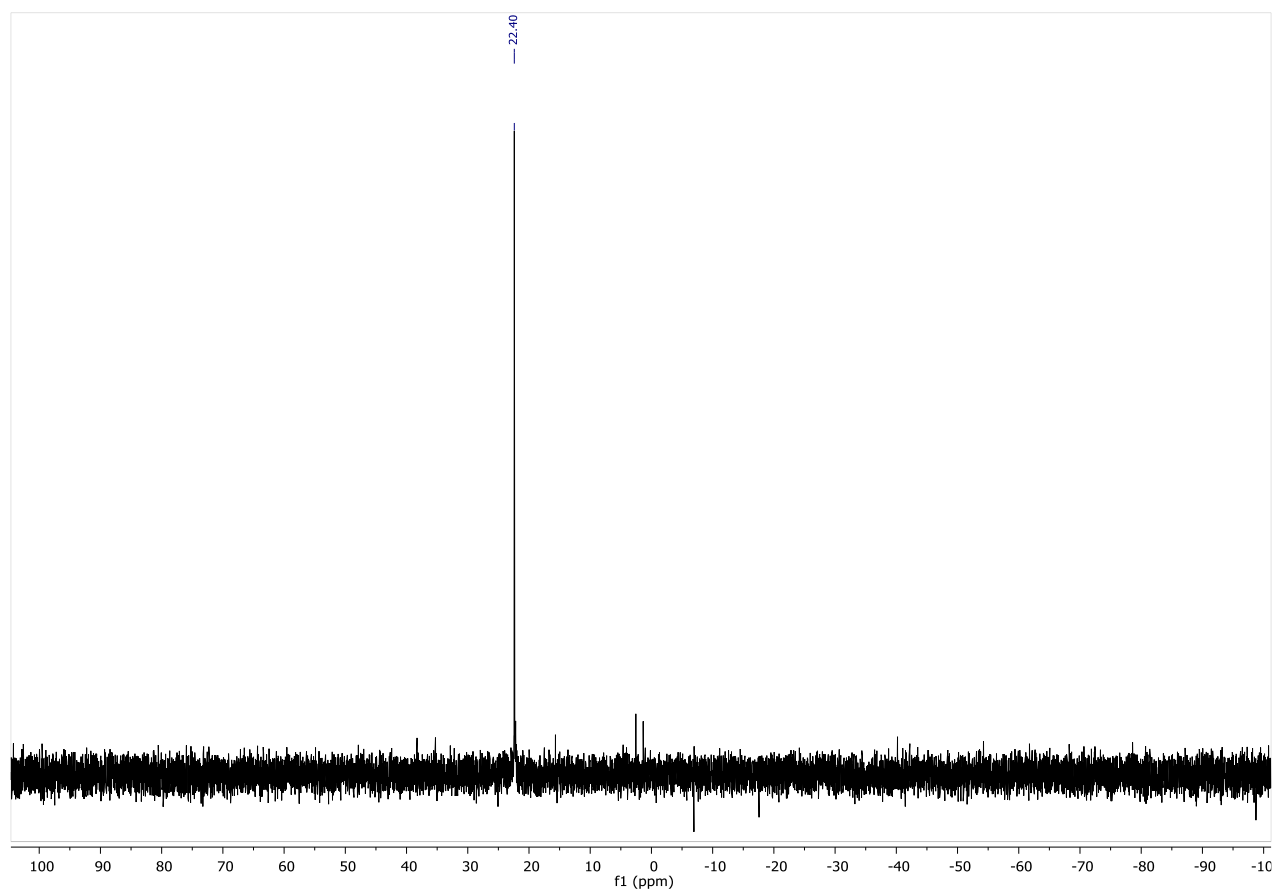

**Ethyl 3-(dimethoxyphosphoryl)-3-((4-methylphenyl)sulfonamido)-3-(4-((trichloromethyl)thio)phenyl)propanoate (7d)**

$^1\text{H}$  NMR (400 MHz,  $\text{CDCl}_3$ )

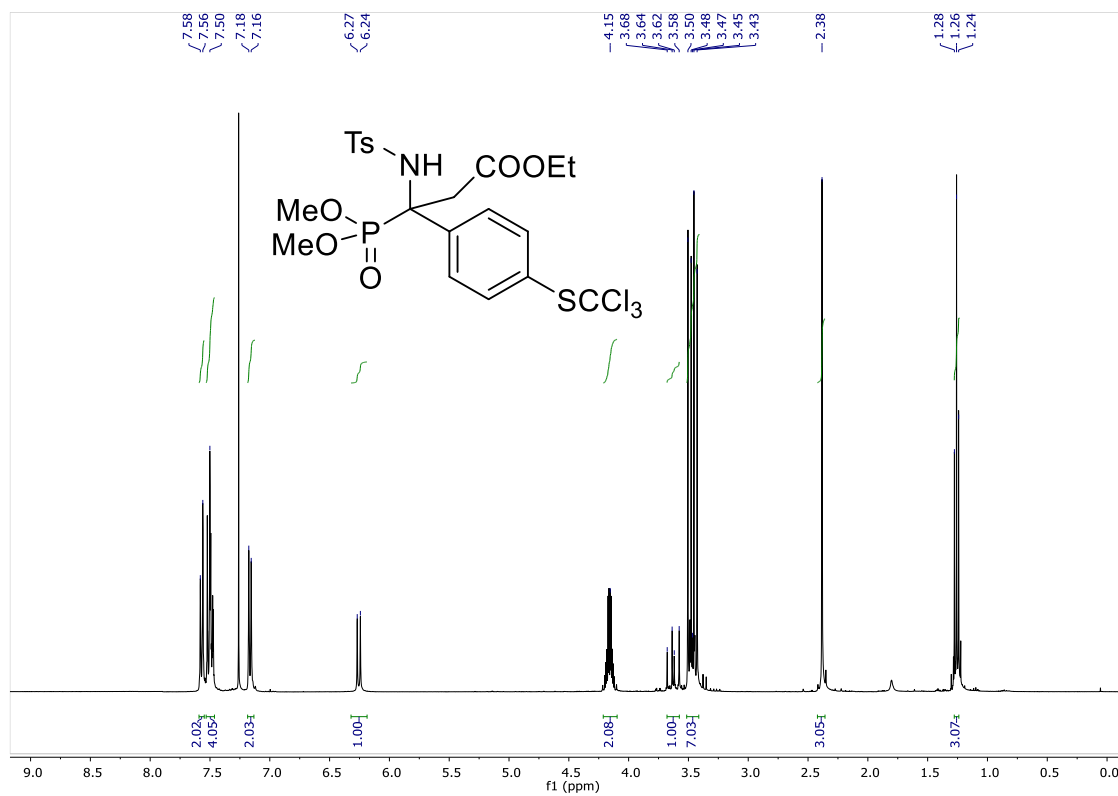

$^{13}\text{C}$  NMR  $\{^1\text{H}\}$  (101 MHz,  $\text{CDCl}_3$ )

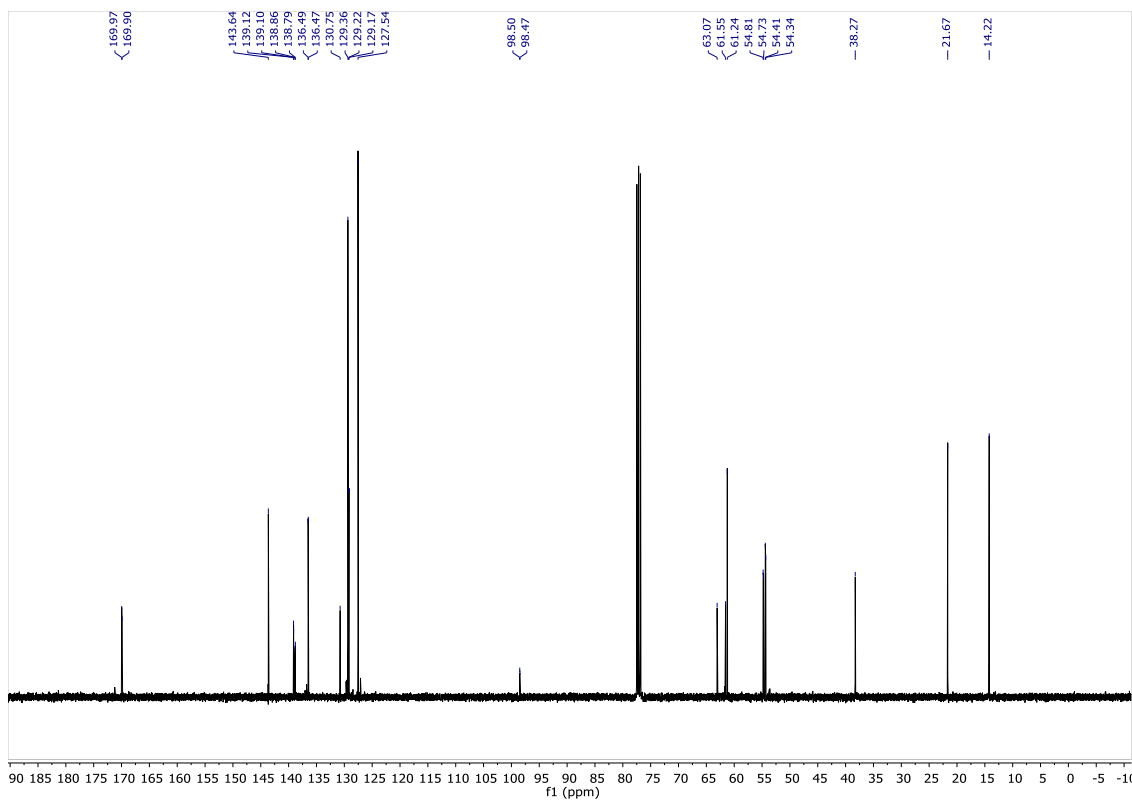

$^{31}\text{P}$  NMR (120 MHz,  $\text{CDCl}_3$ )

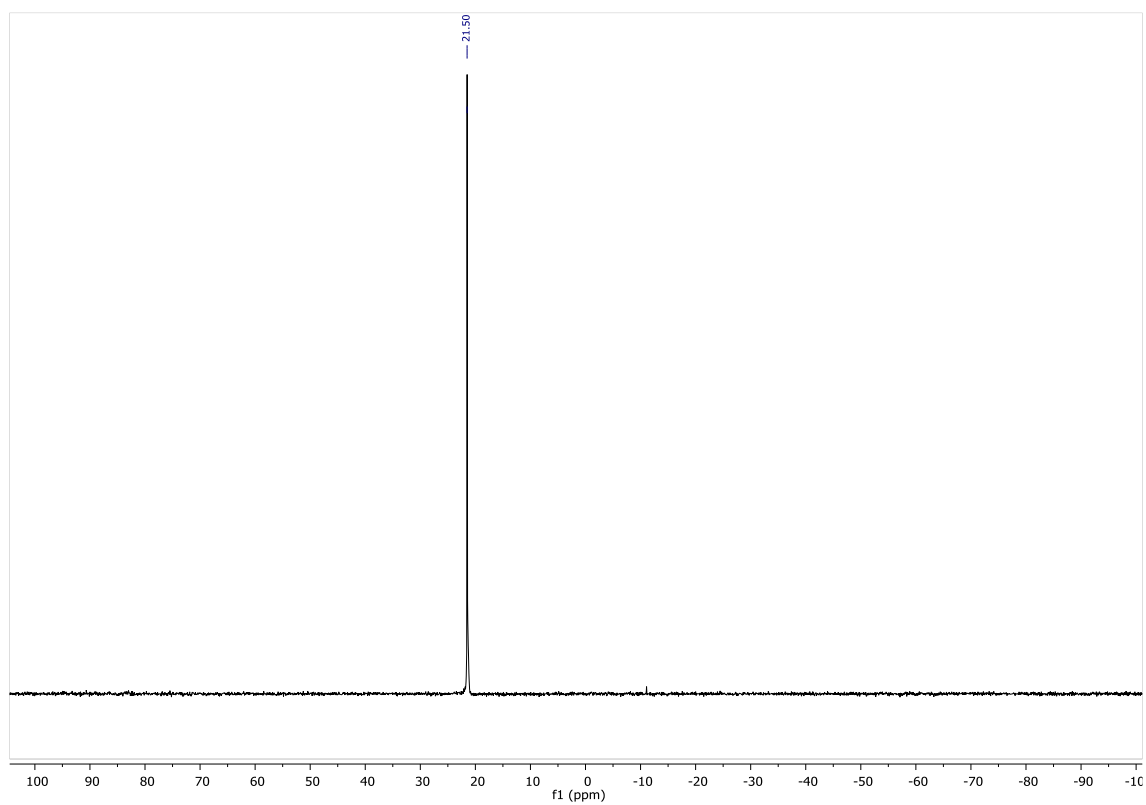

**Ethyl 3-(4-bromophenyl)-3-(dimethoxyphosphoryl)-3-((4-methylphenyl)sulfonamido)propanoate (7e)**

$^1\text{H}$  NMR (400 MHz,  $\text{CDCl}_3$ )

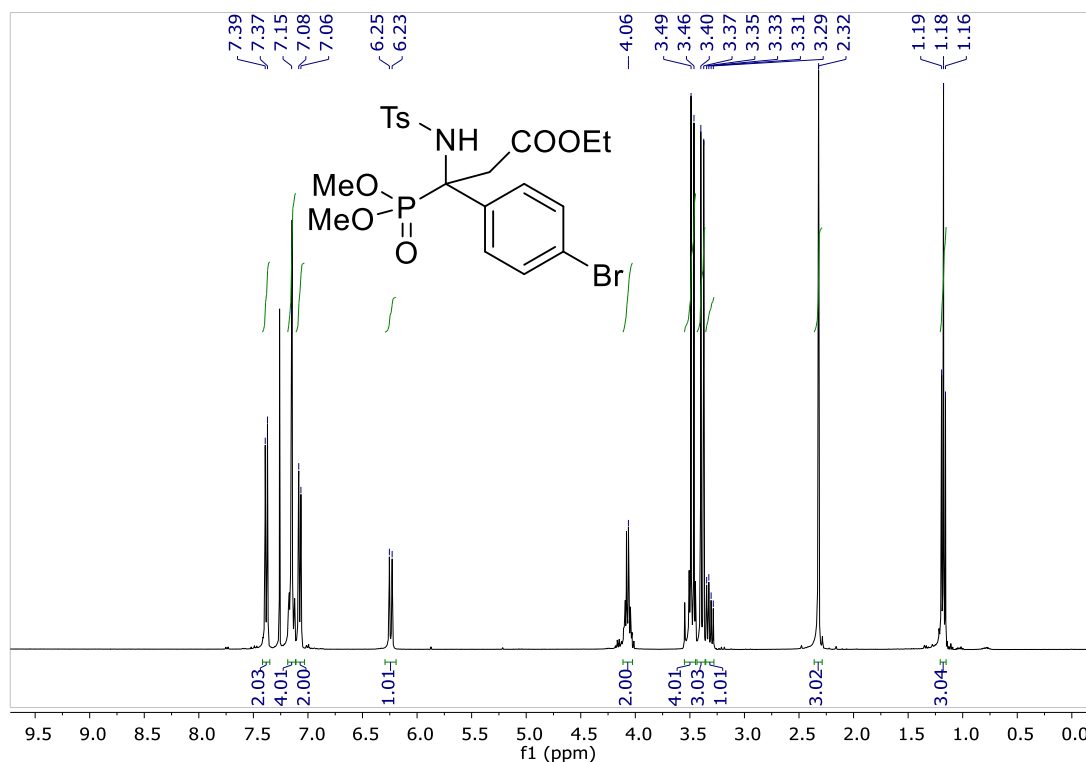

$^{13}\text{C}$  NMR  $\{^1\text{H}\}$  (101 MHz,  $\text{CDCl}_3$ )

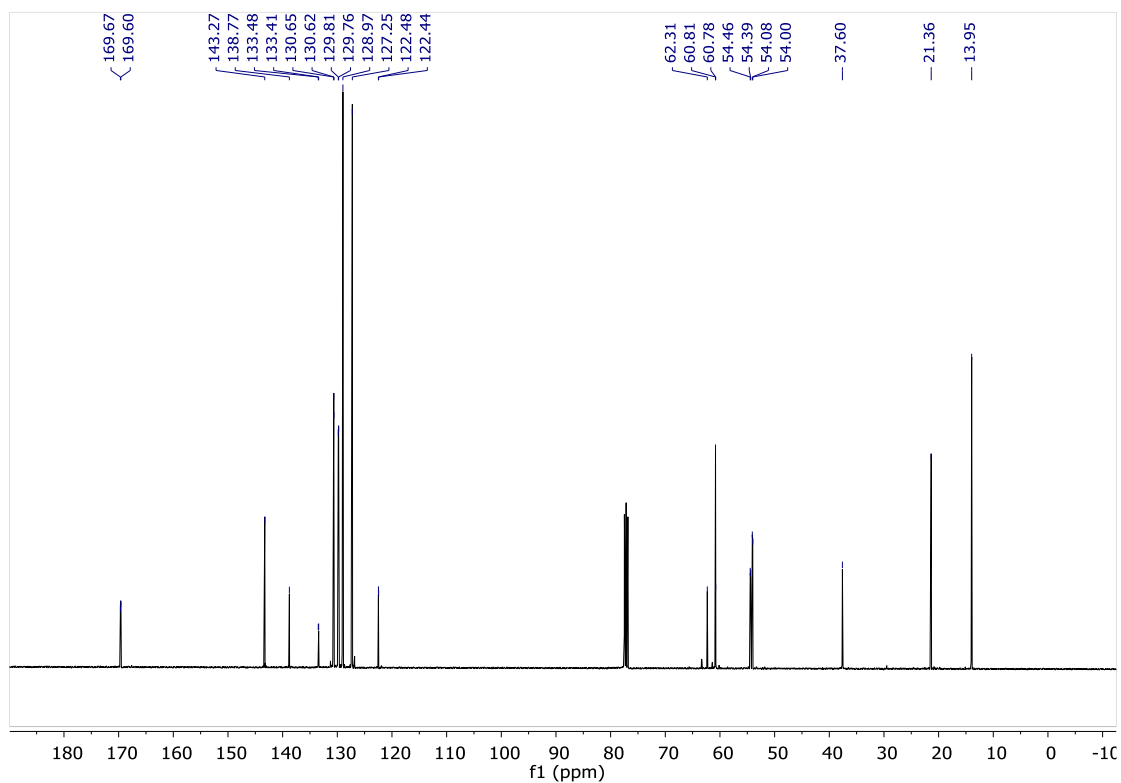

$^{31}\text{P}$  NMR (120 MHz,  $\text{CDCl}_3$ )

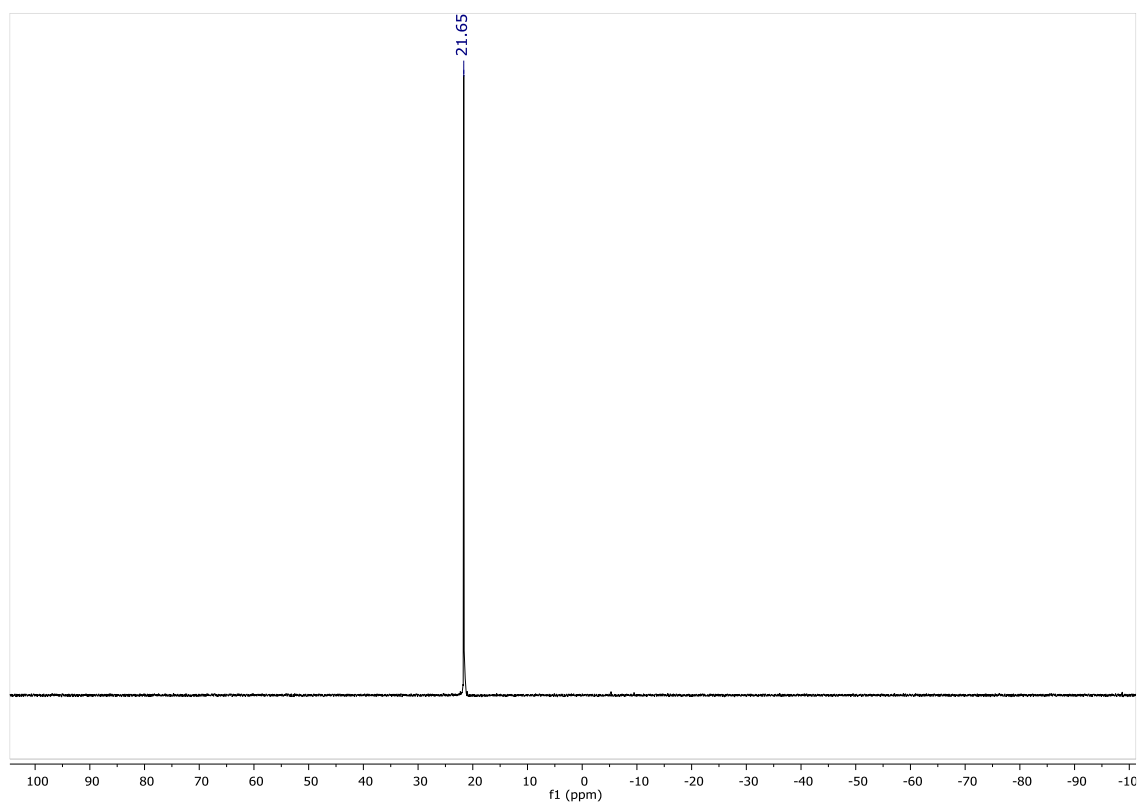

Ethyl 3-(4-chlorophenyl)-3-(dimethoxyphosphoryl)-3-((4-methylphenyl)sulfonamido)propanoate (7f)

$^1\text{H}$  NMR (400 MHz,  $\text{CDCl}_3$ )

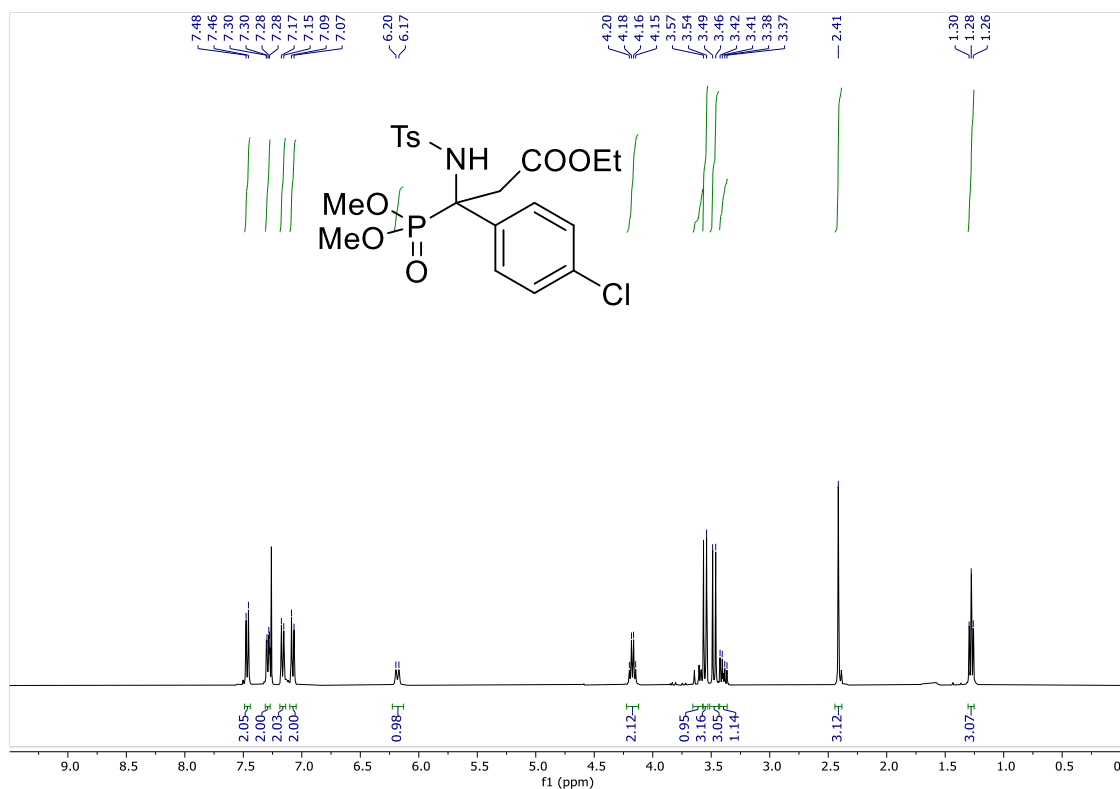

$^{13}\text{C}$  NMR  $\{^1\text{H}\}$  (75 MHz,  $\text{CDCl}_3$ )

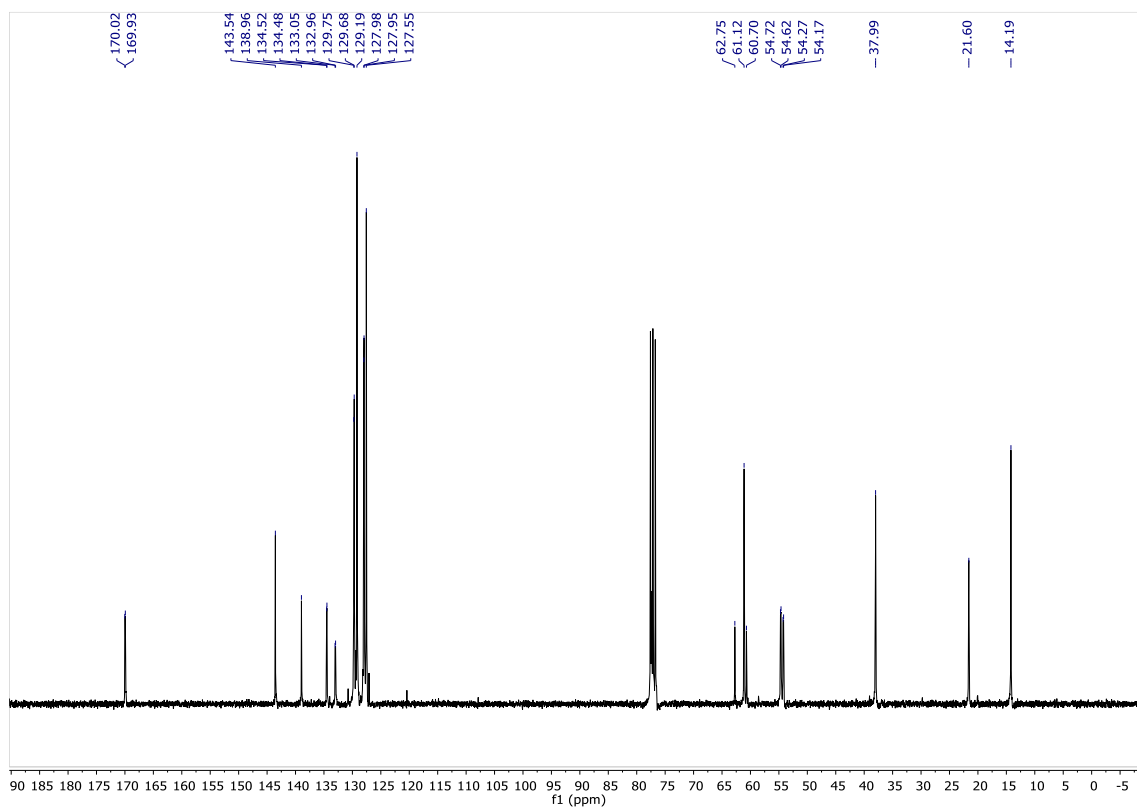

$^{31}\text{P}$  NMR (120 MHz,  $\text{CDCl}_3$ )

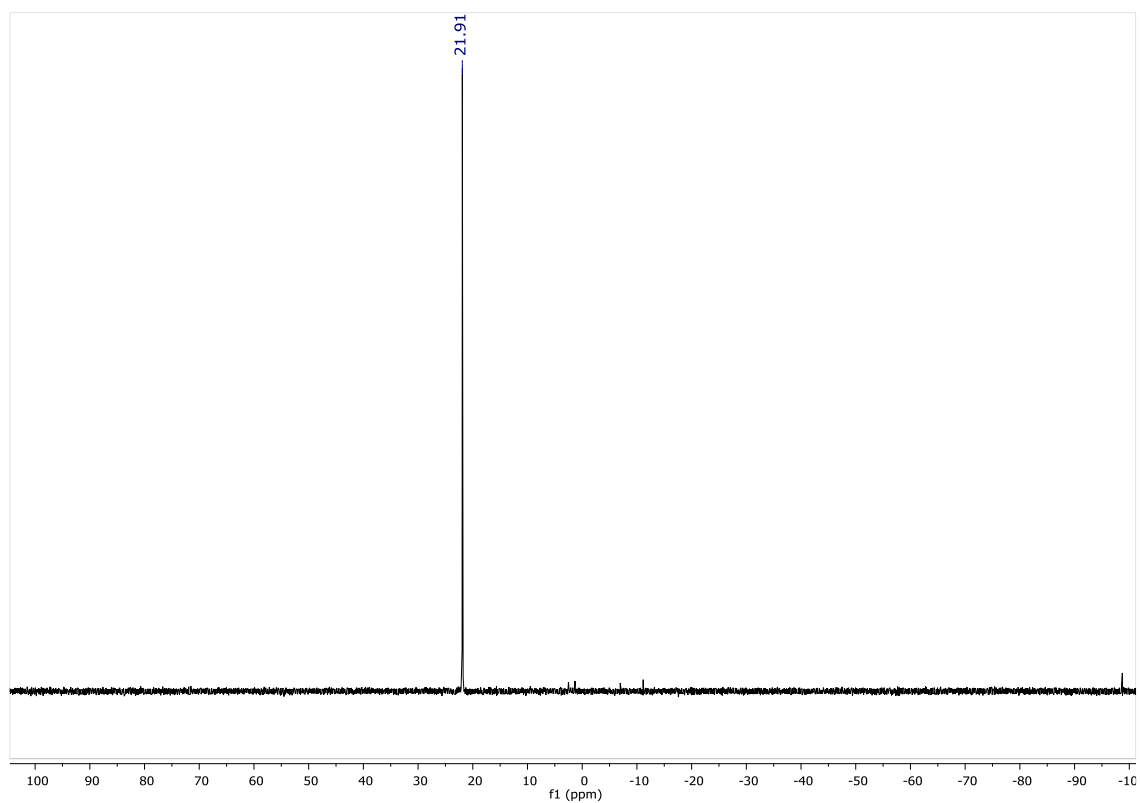

Ethyl 3-(3-chlorophenyl)-3-(dimethoxyphosphoryl)-3-((4-methylphenyl)sulfonamido)propanoate (7g)

$^1\text{H}$  NMR (400 MHz,  $\text{CDCl}_3$ )

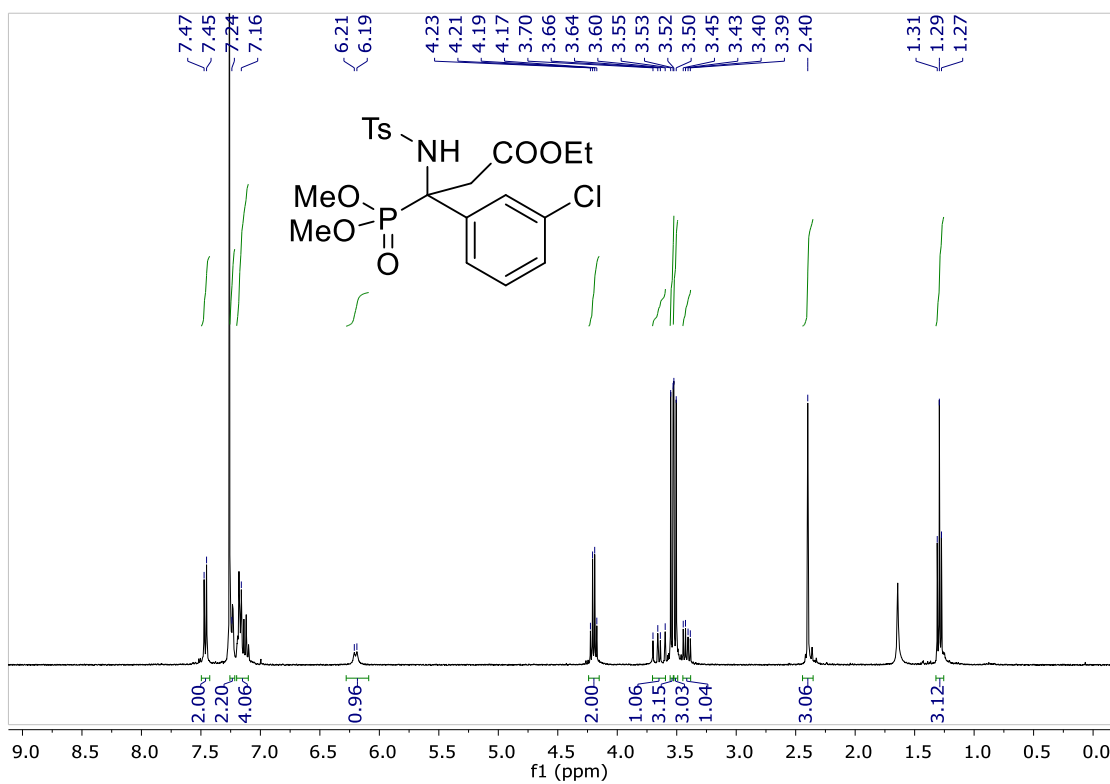

$^{13}\text{C}$  NMR  $\{^1\text{H}\}$  (101 MHz,  $\text{CDCl}_3$ )

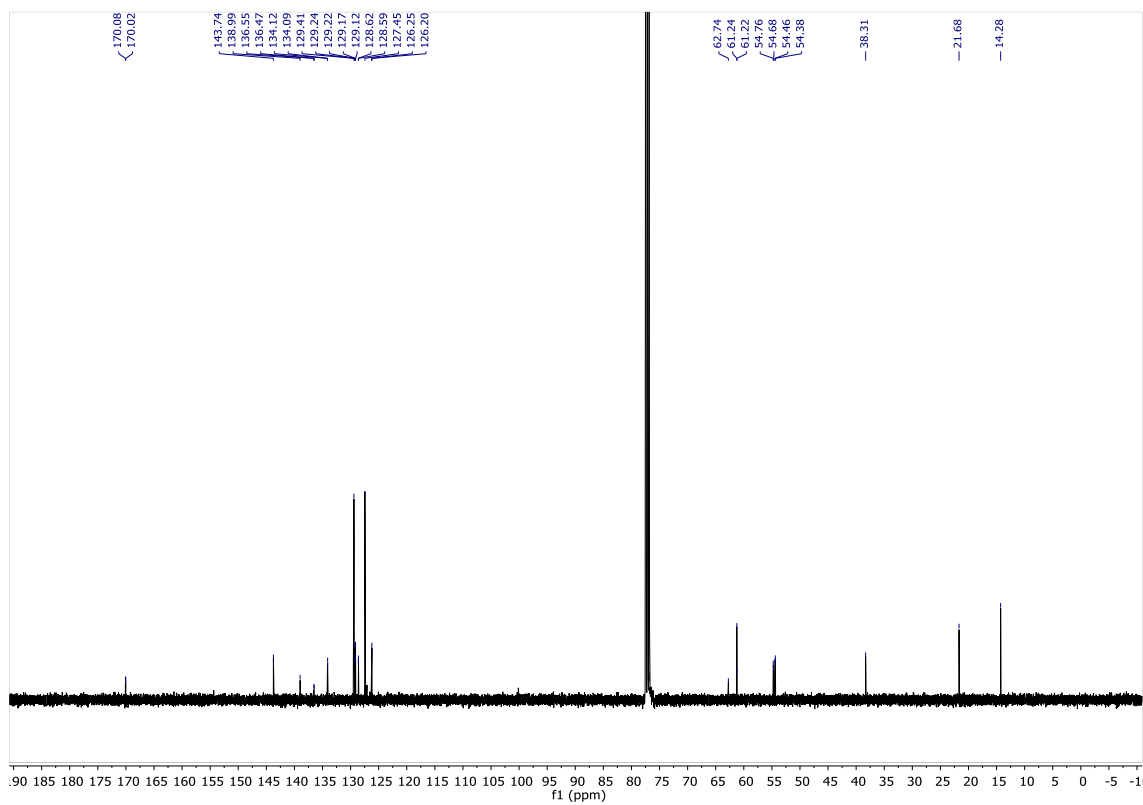



$^{31}\text{P}$  NMR (120 MHz,  $\text{CDCl}_3$ )

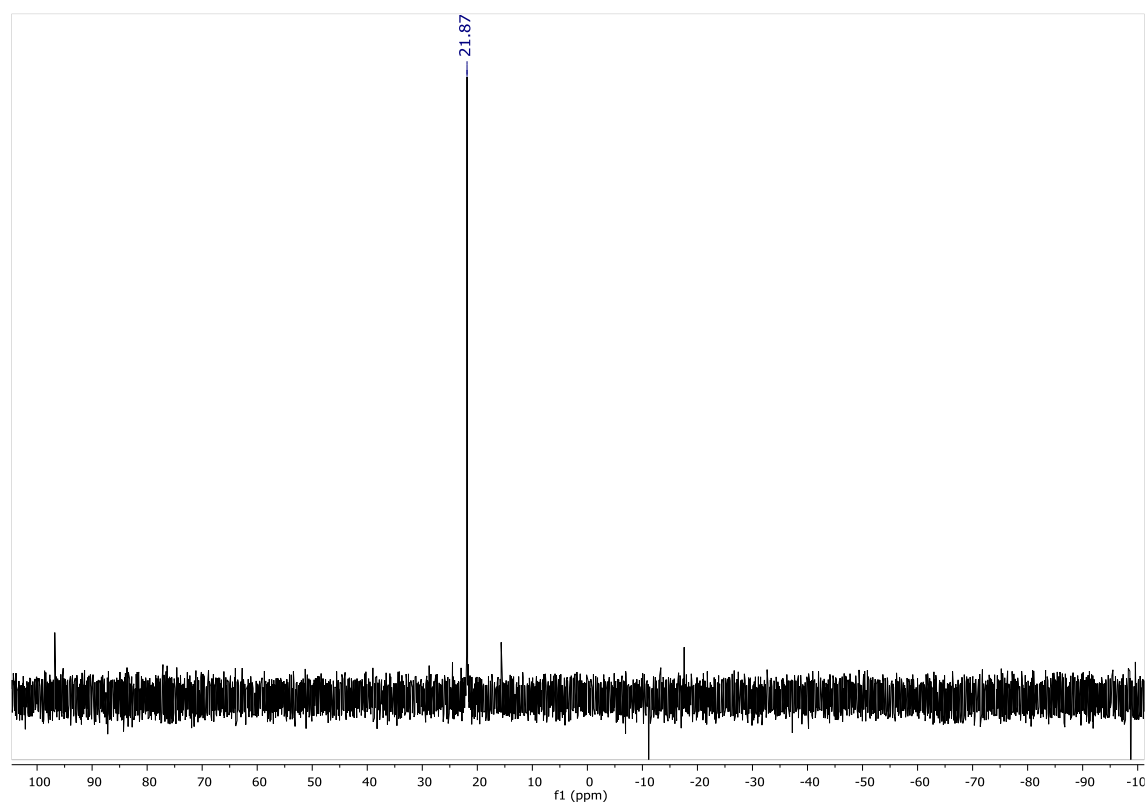

**Ethyl 3-(3,4-dichlorophenyl)-3-(dimethoxyphosphoryl)-3-((4-methylphenyl)sulfonamido)propanoate (7h)**

$^1\text{H}$  NMR (400 MHz,  $\text{CDCl}_3$ )

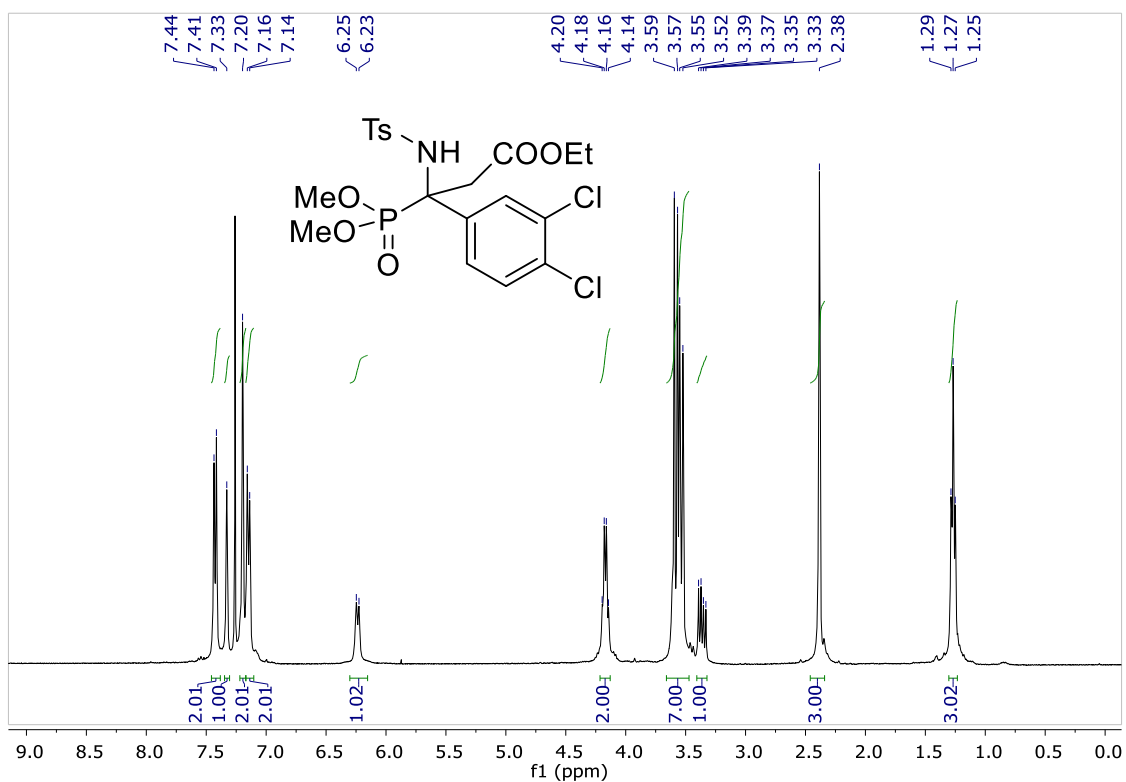

$^{13}\text{C}$  NMR  $\{^1\text{H}\}$  (101 MHz,  $\text{CDCl}_3$ )

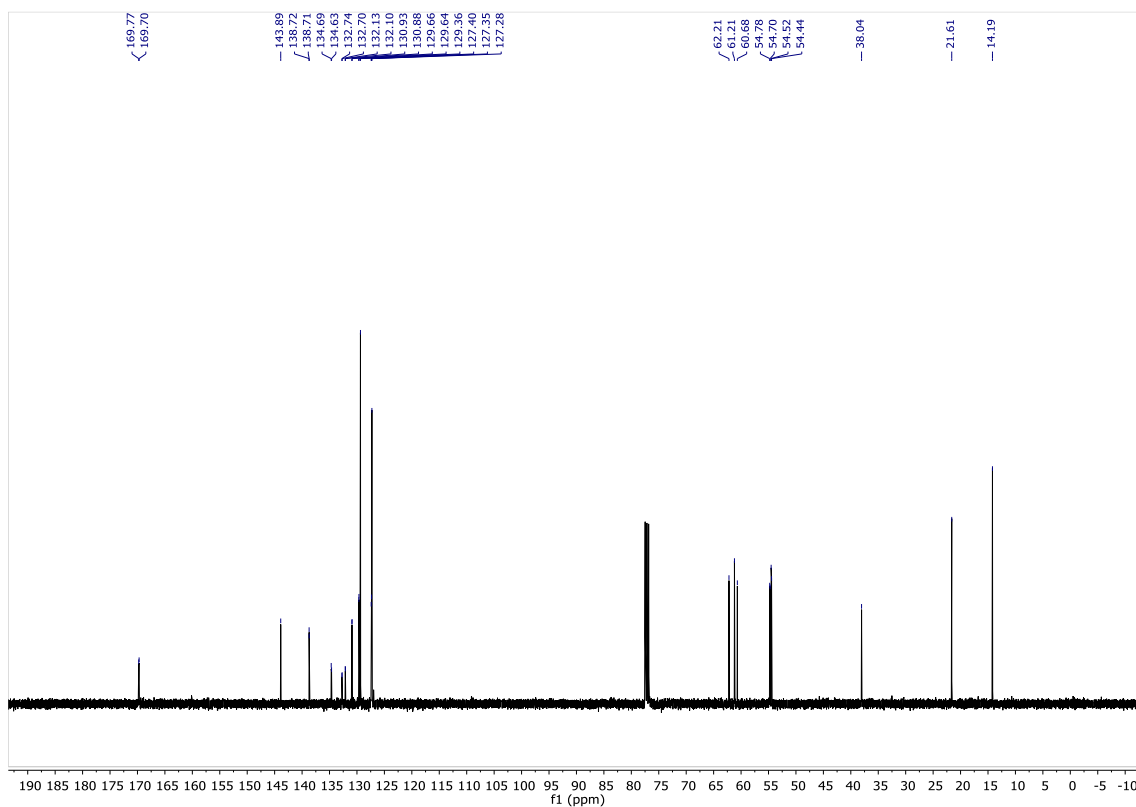

$^{31}\text{P}$  NMR (120 MHz,  $\text{CDCl}_3$ )

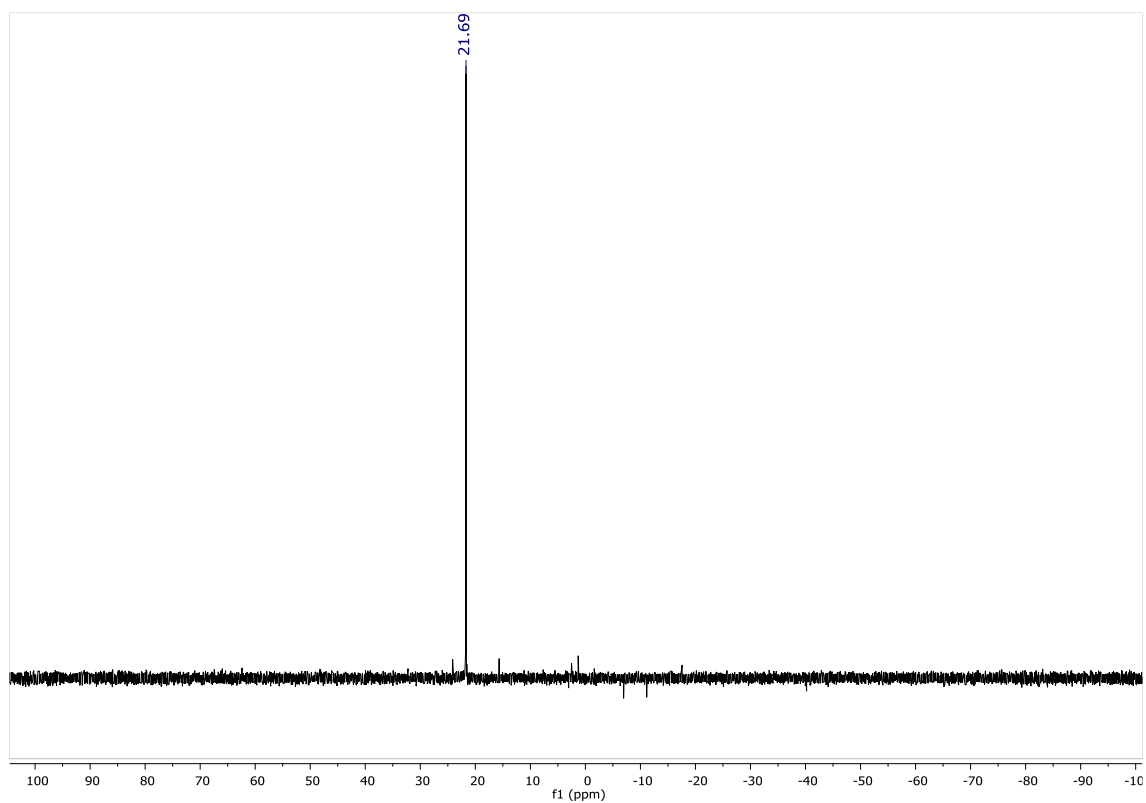

Ethyl 3-(3-chloro-4-methoxyphenyl)-3-(dimethoxyphosphoryl)-3-((4-methylphenyl)sulfonamido)propanoate (7i)

$^1\text{H}$  NMR (400 MHz,  $\text{CDCl}_3$ )

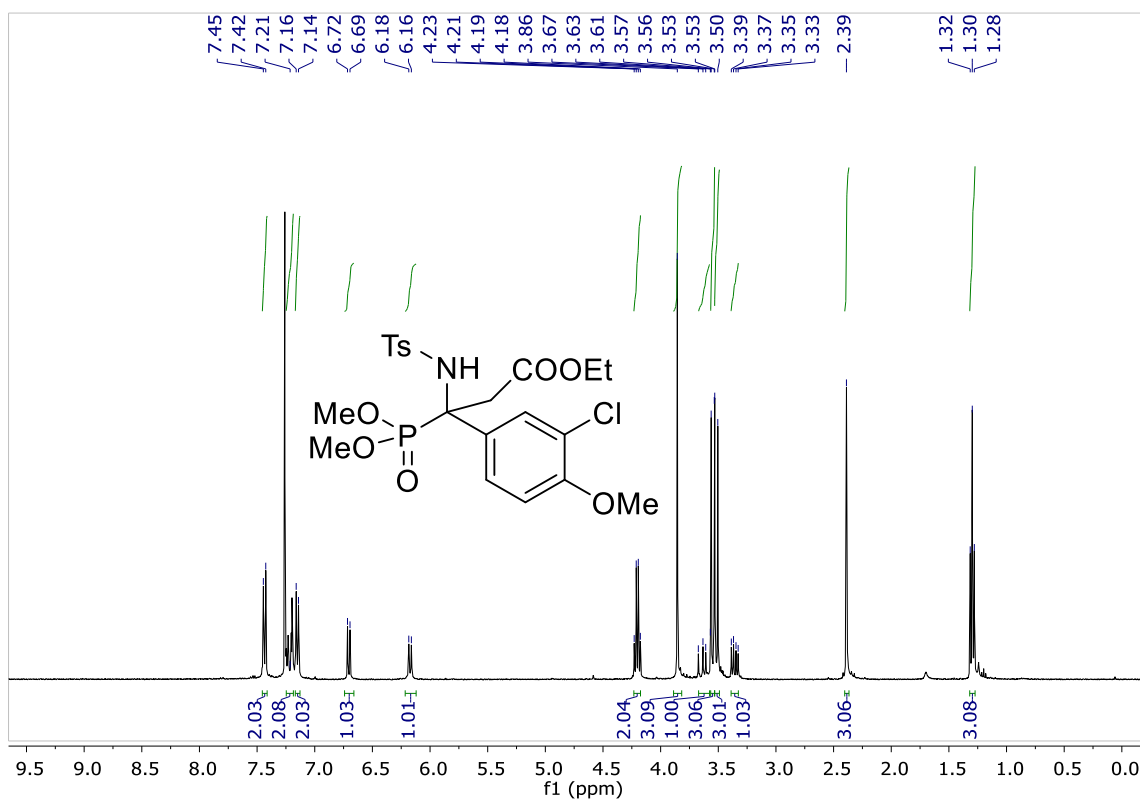

$^{13}\text{C}$  NMR  $\{^1\text{H}\}$  (101 MHz,  $\text{CDCl}_3$ )

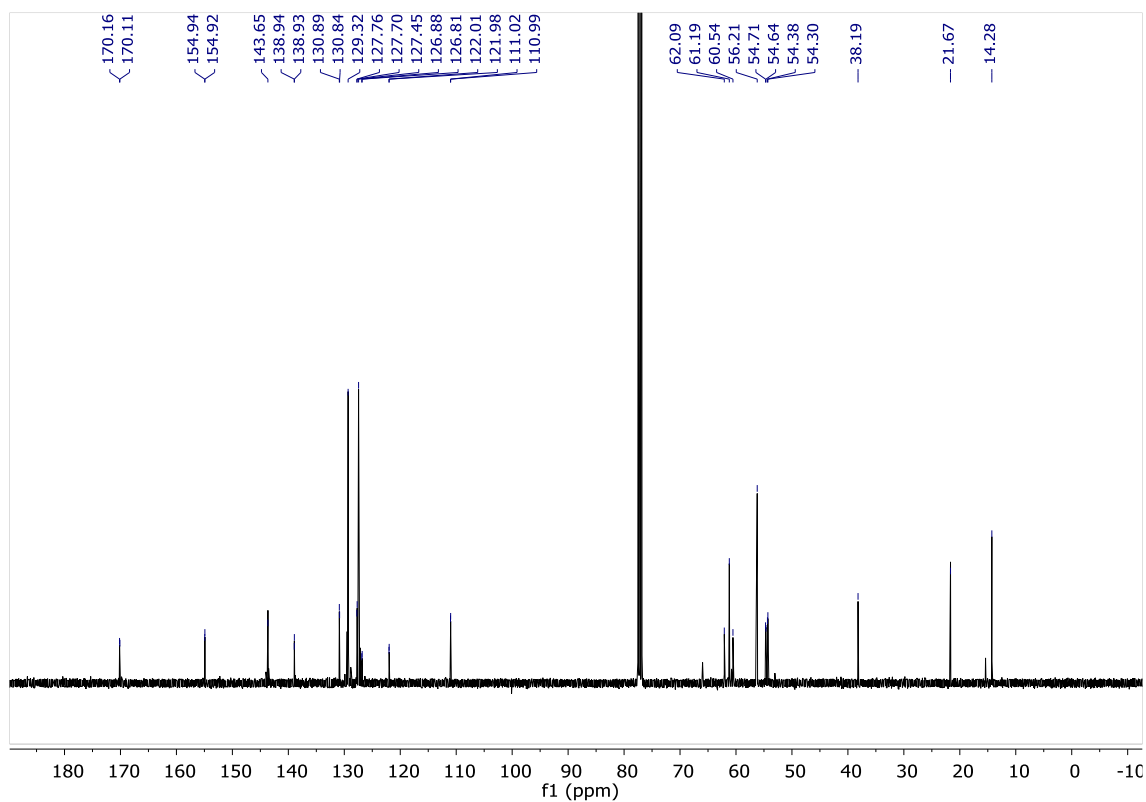

$^{31}\text{P}$  NMR (120 MHz,  $\text{CDCl}_3$ )

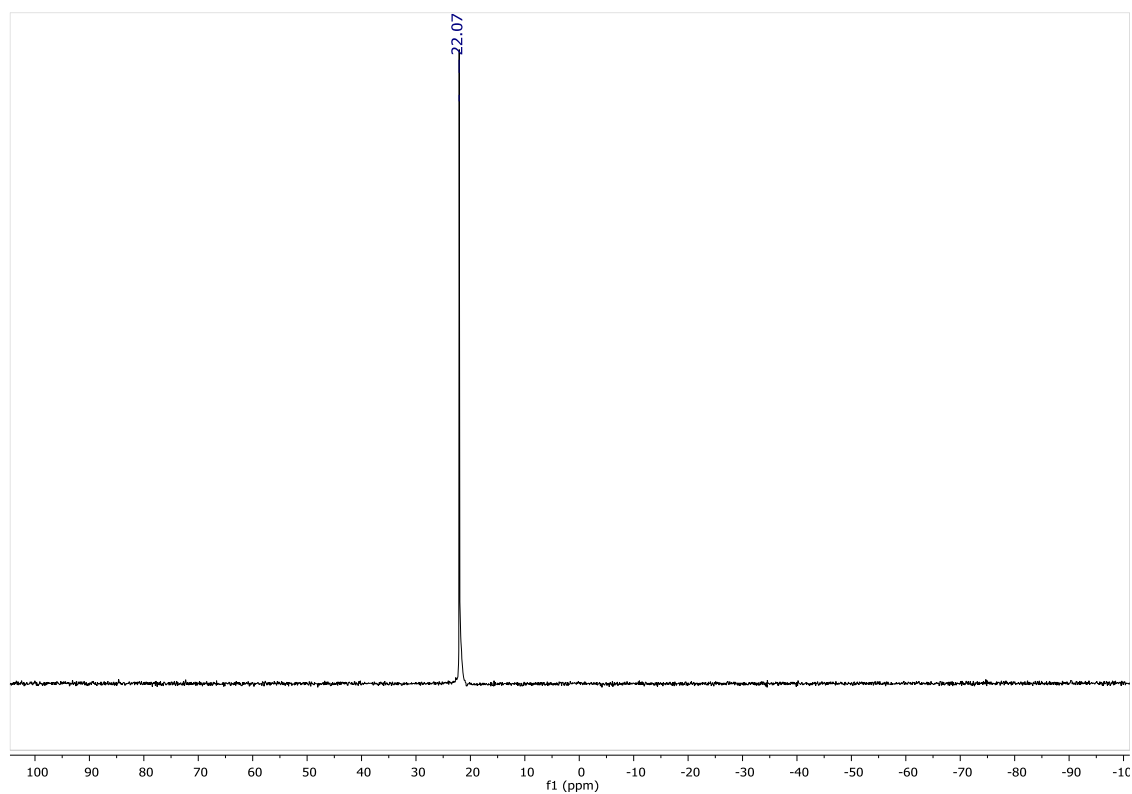

**Ethyl 3-(dimethoxyphosphoryl)-3-(4-fluorophenyl)-3-((4-methylphenyl)sulfonamido)propanoate (7j)**

$^1\text{H}$  NMR (400 MHz,  $\text{CDCl}_3$ )

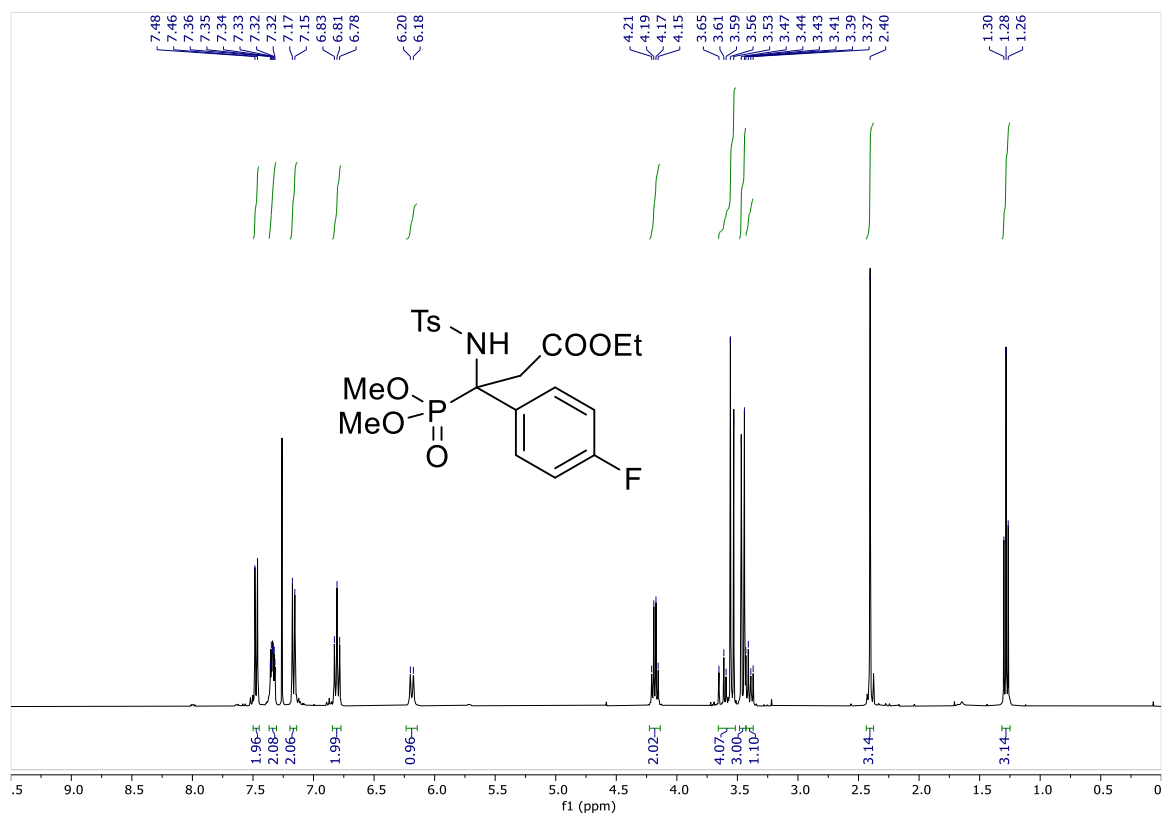

$^{13}\text{C}$  NMR  $\{^1\text{H}\}$  (75 MHz,  $\text{CDCl}_3$ )

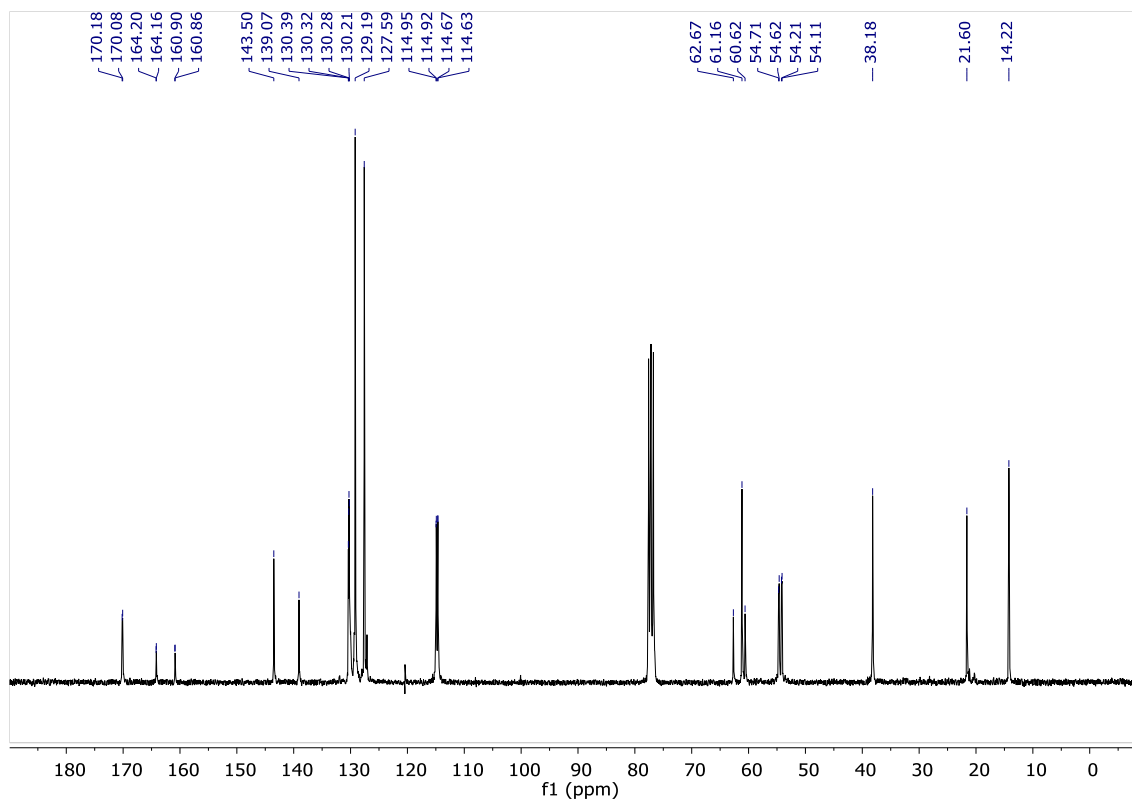

$^{31}\text{P}$  NMR (120 MHz,  $\text{CDCl}_3$ )

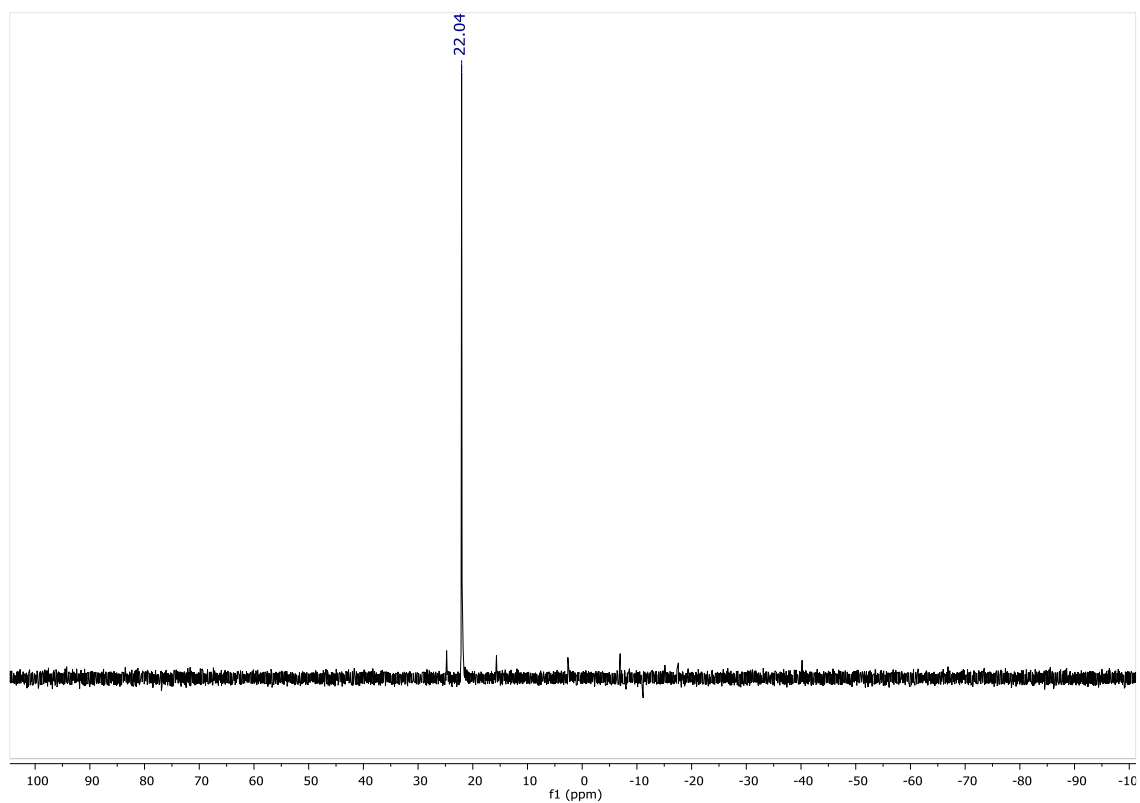

$^{19}\text{F}$  NMR (282 MHz,  $\text{CDCl}_3$ )

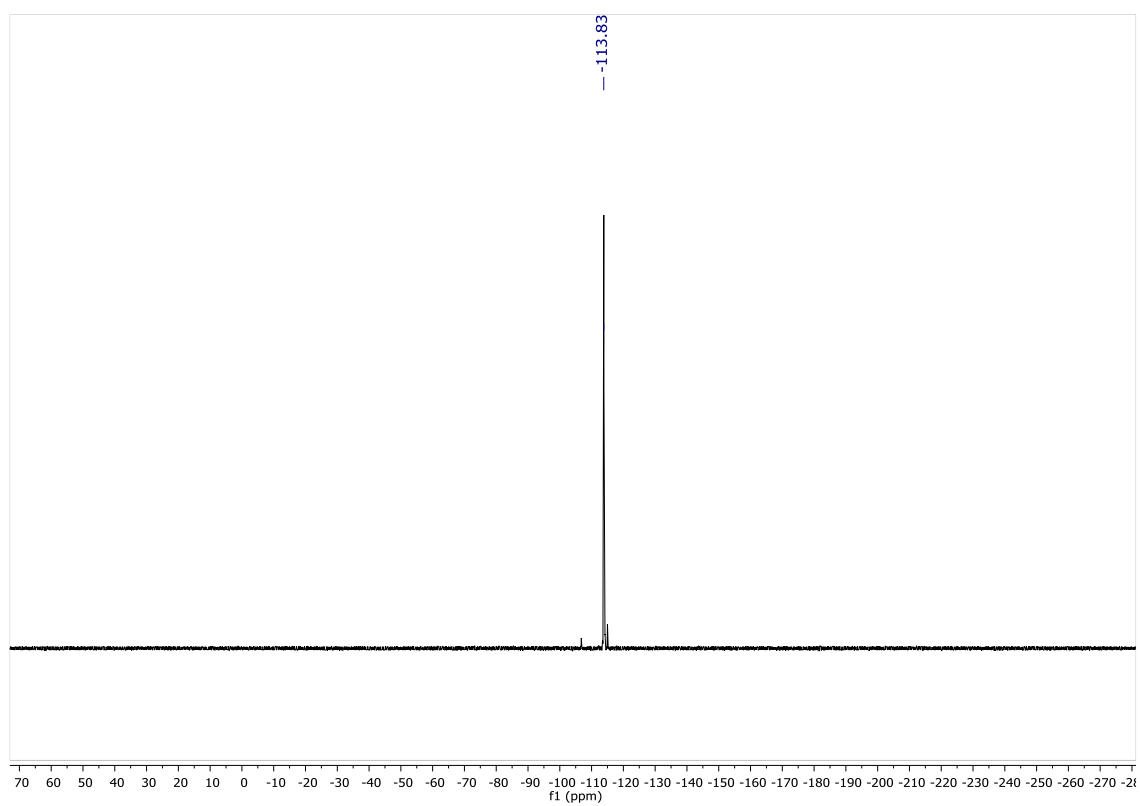

Ethyl 3-(dimethoxyphosphoryl)-3-(3-fluorophenyl)-3-((4-methylphenyl)sulfonamido)propanoate (7k)

$^1\text{H}$  NMR (400 MHz,  $\text{CDCl}_3$ )

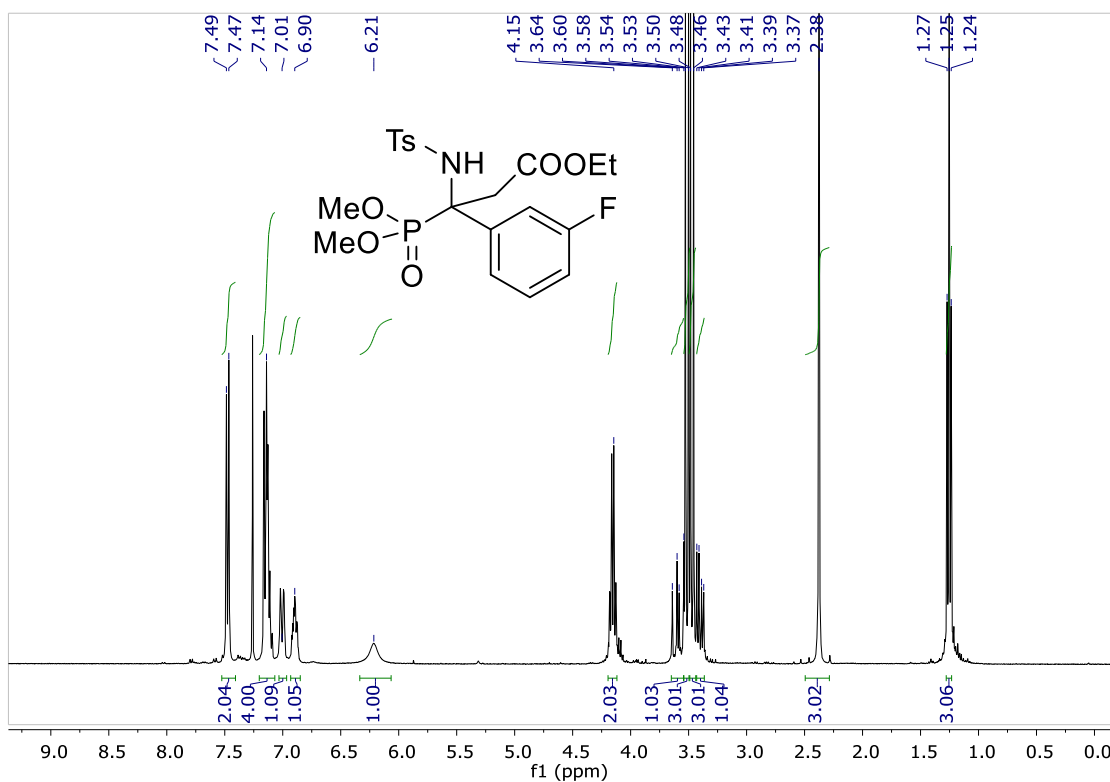

$^{13}\text{C}$  NMR  $\{^1\text{H}\}$  (101 MHz,  $\text{CDCl}_3$ )

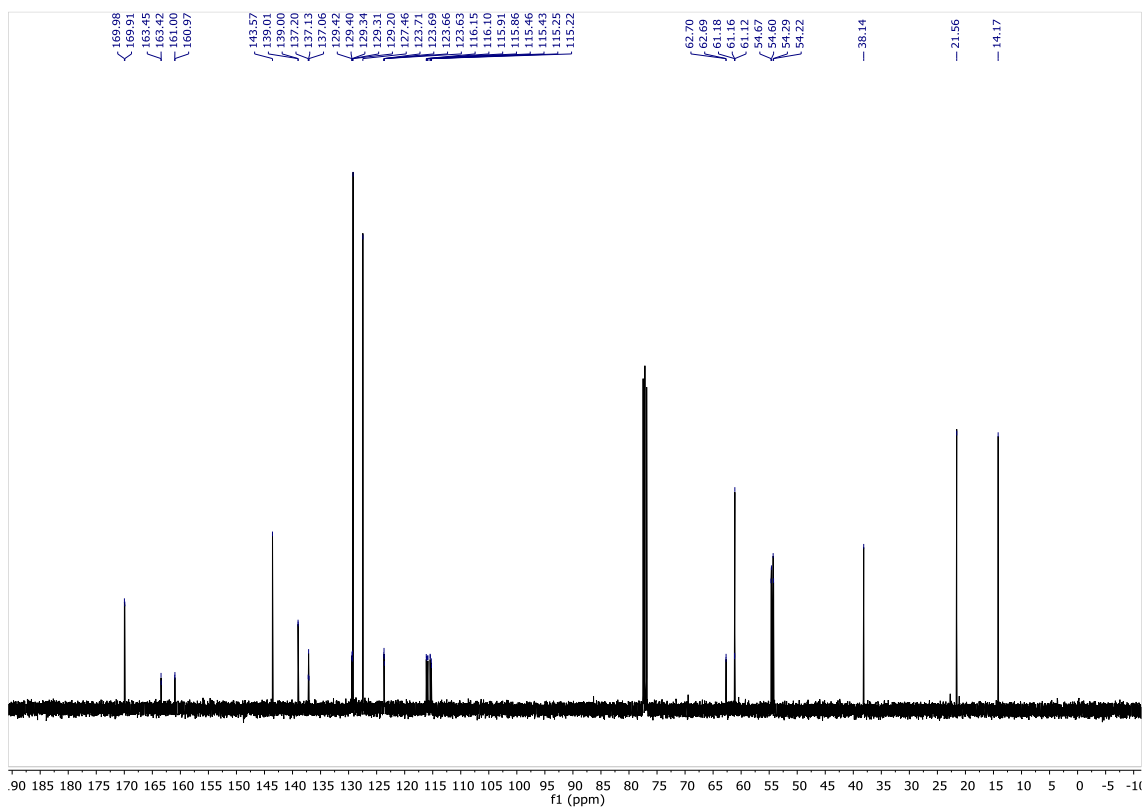



$^{31}\text{P}$  NMR (120 MHz,  $\text{CDCl}_3$ )

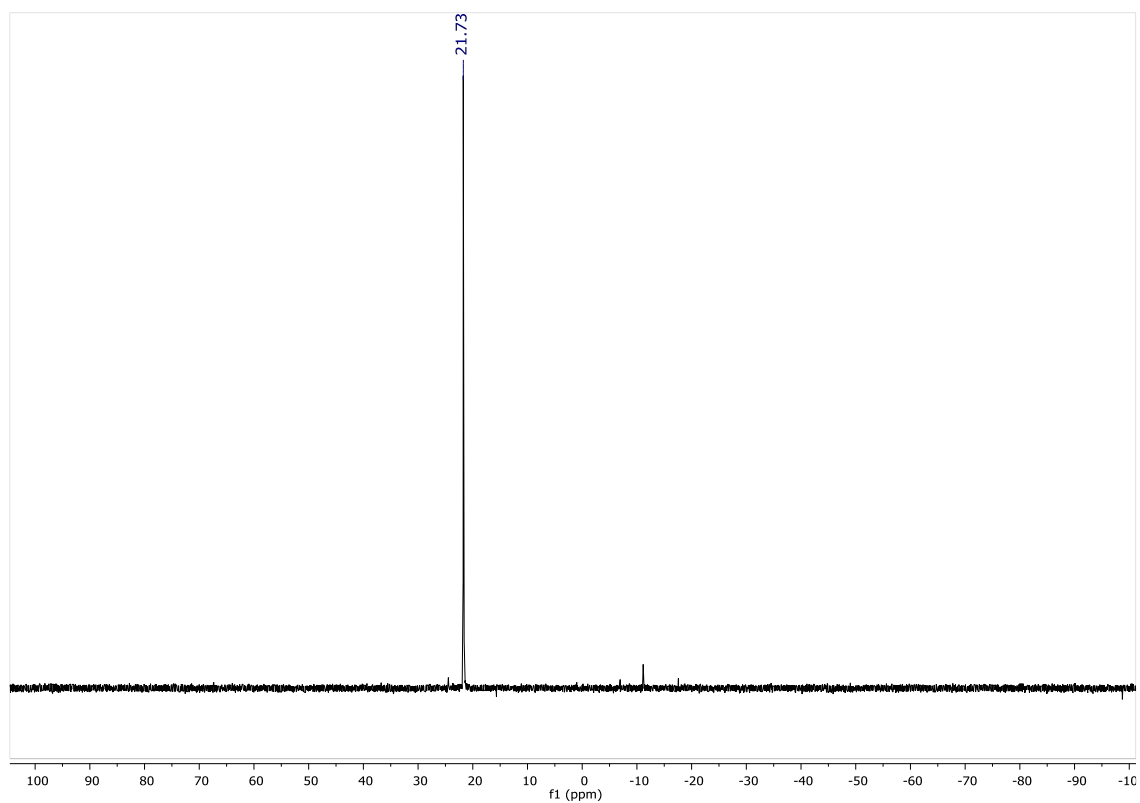

$^{19}\text{F}$  NMR (282 MHz,  $\text{CDCl}_3$ )

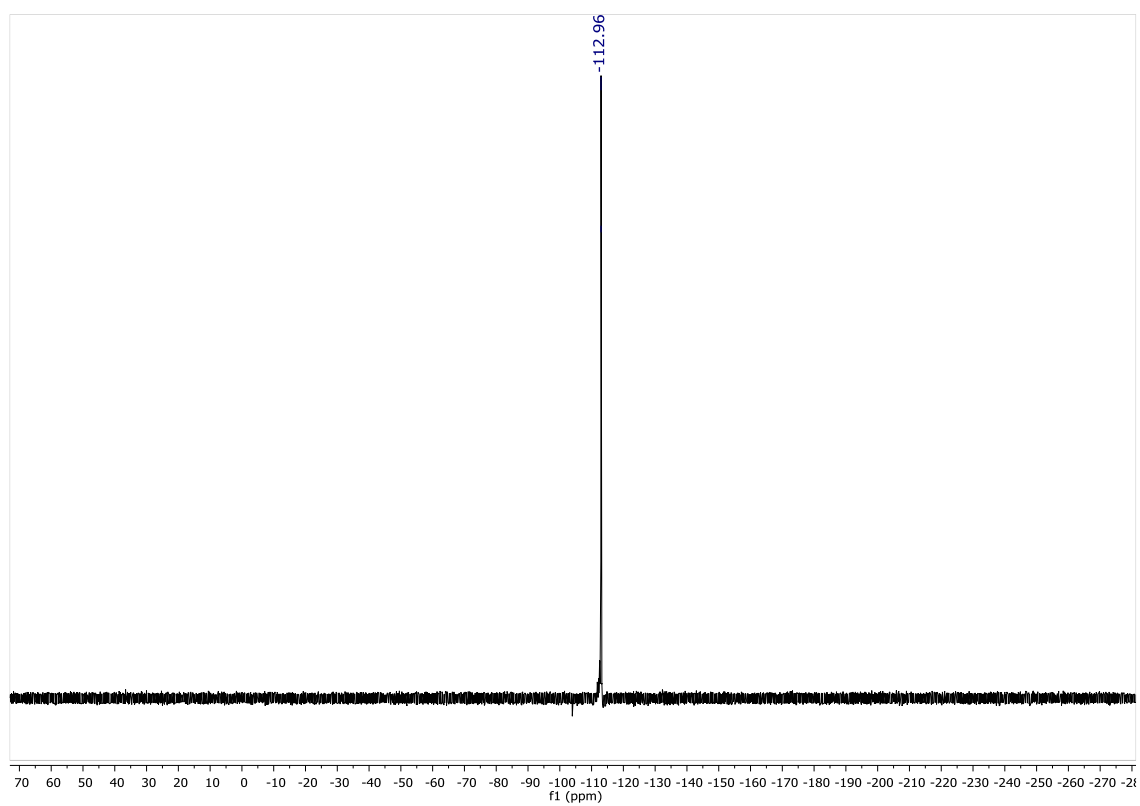

**Ethyl 3-(dimethoxyphosphoryl)-3-(2-fluorophenyl)-3-((4-methylphenyl)sulfonamido)propanoate (71)**

$^1\text{H}$  NMR (400 MHz,  $\text{CDCl}_3$ )

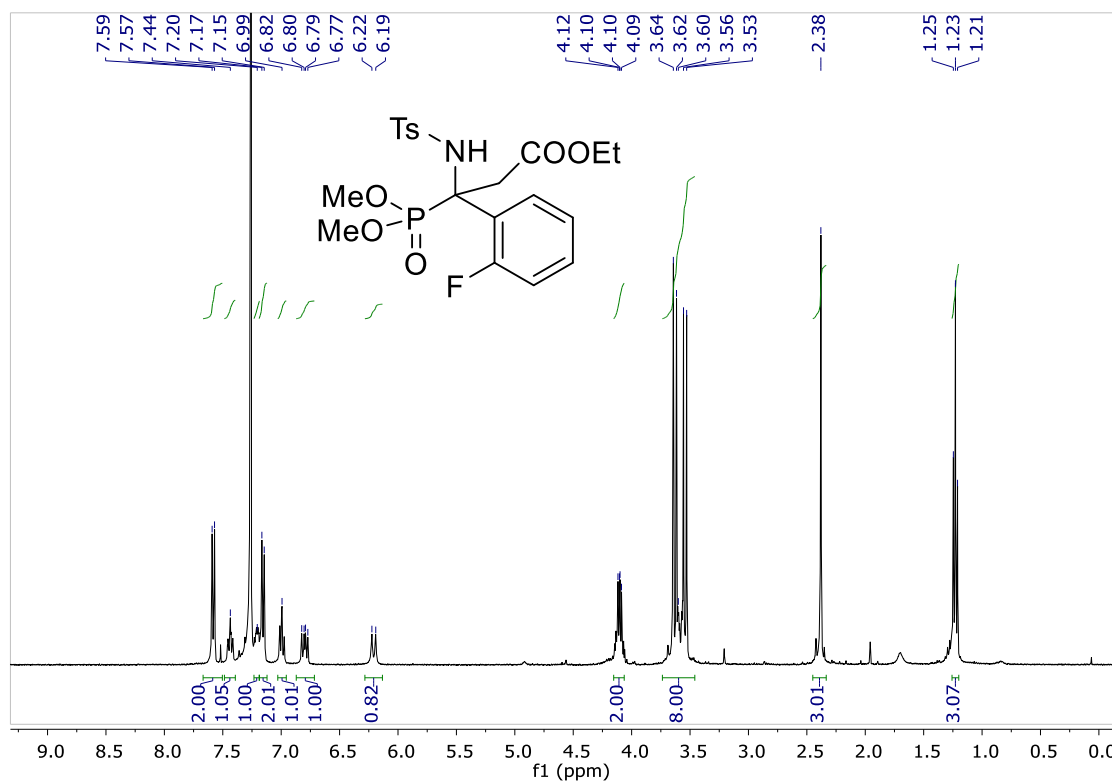

$^{13}\text{C}$  NMR  $\{^1\text{H}\}$  (101 MHz,  $\text{CDCl}_3$ )

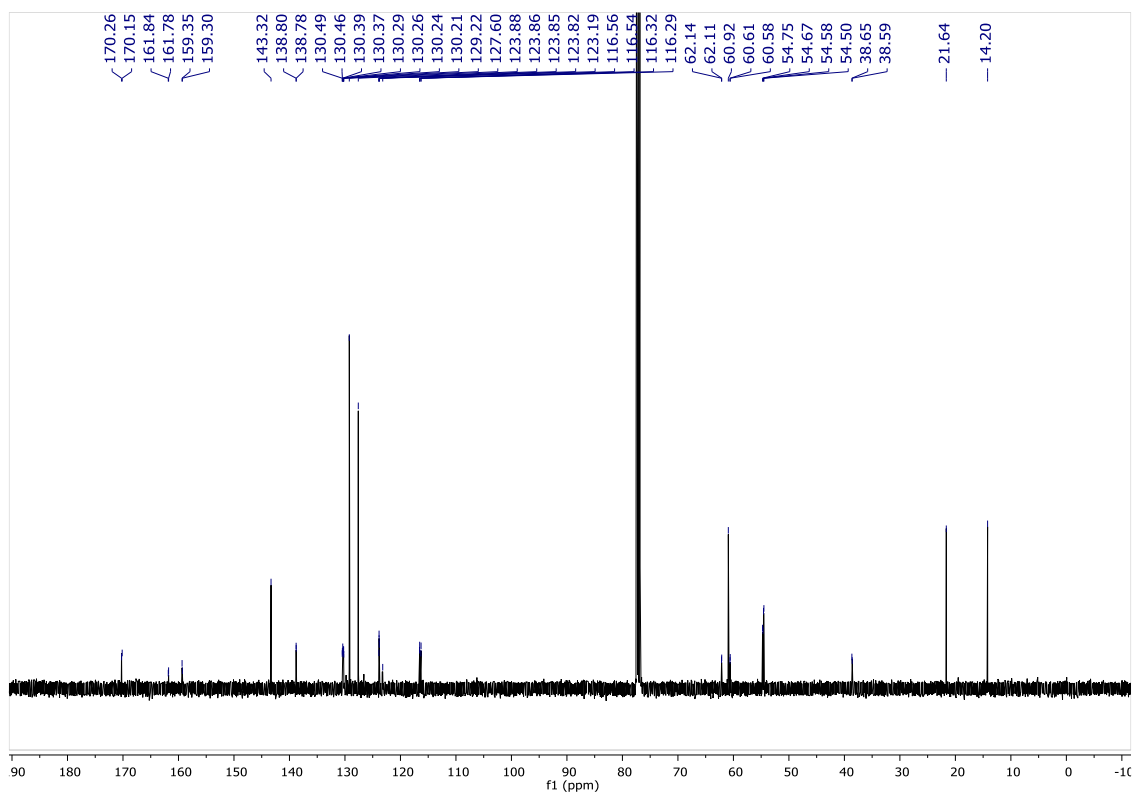

$^{31}\text{P}$  NMR (120MHz,  $\text{CDCl}_3$ )

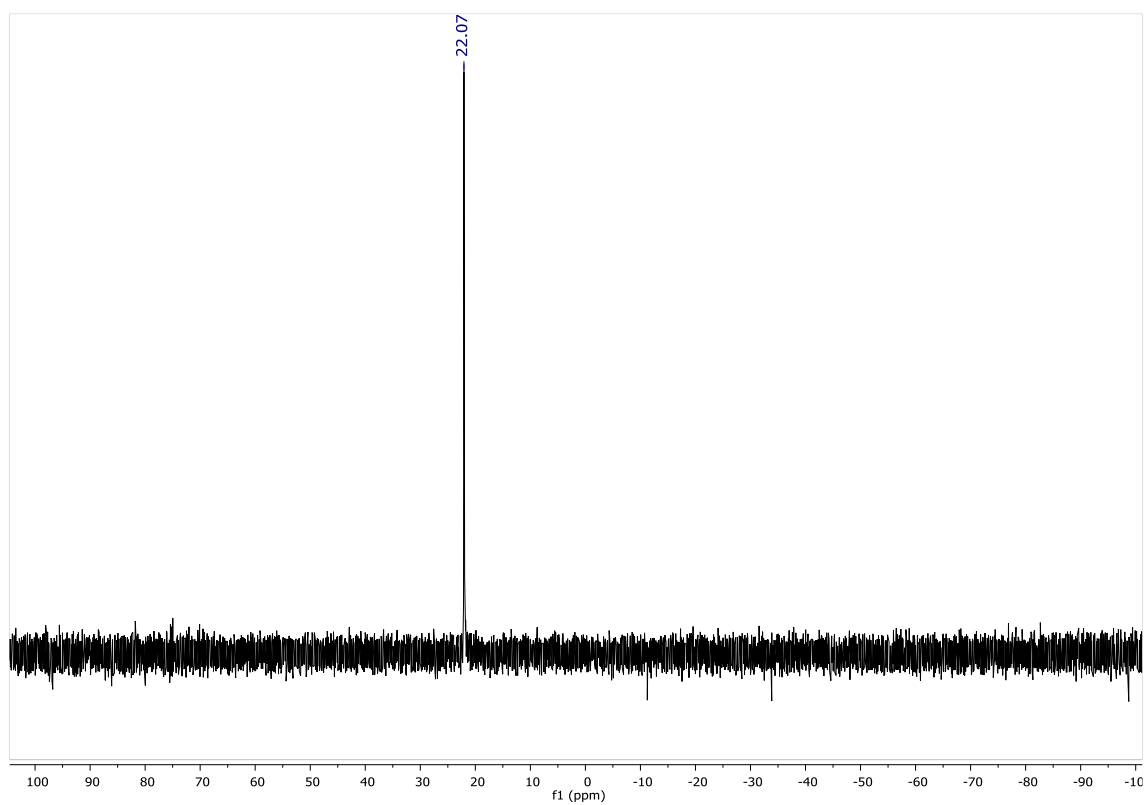

$^{19}\text{F}$  NMR (282 MHz,  $\text{CDCl}_3$ )

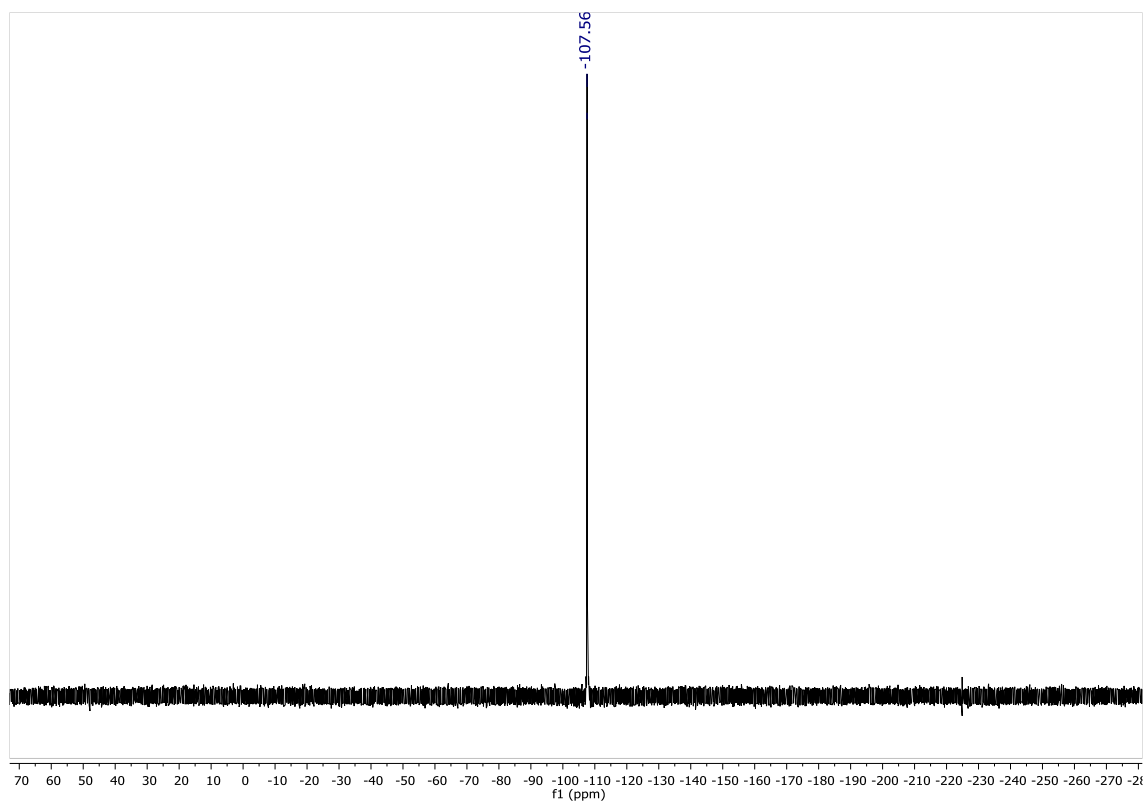

**Ethyl 3-(2,4-difluorophenyl)-3-(dimethoxyphosphoryl)-3-((4-methylphenyl)sulfonamido)propanoate (7m)**

$^1\text{H}$  NMR (400 MHz,  $\text{CDCl}_3$ )

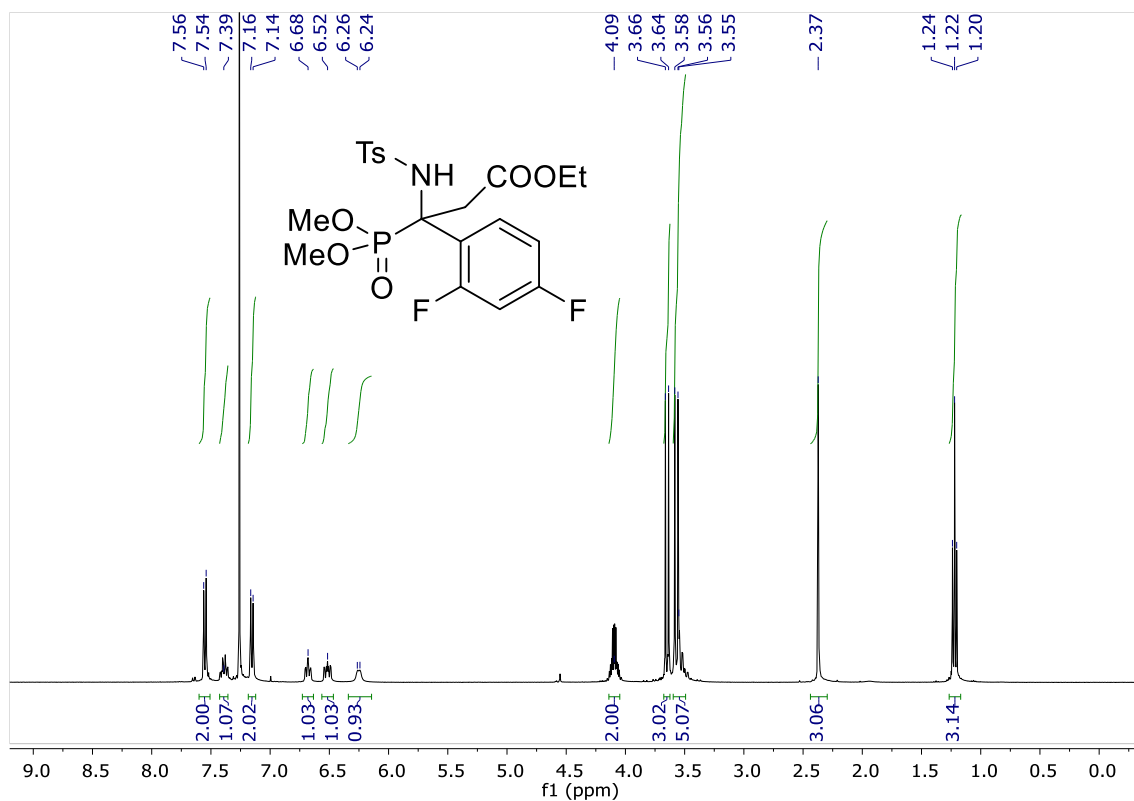

$^{13}\text{C}$  NMR  $\{^1\text{H}\}$  (101 MHz,  $\text{CDCl}_3$ )

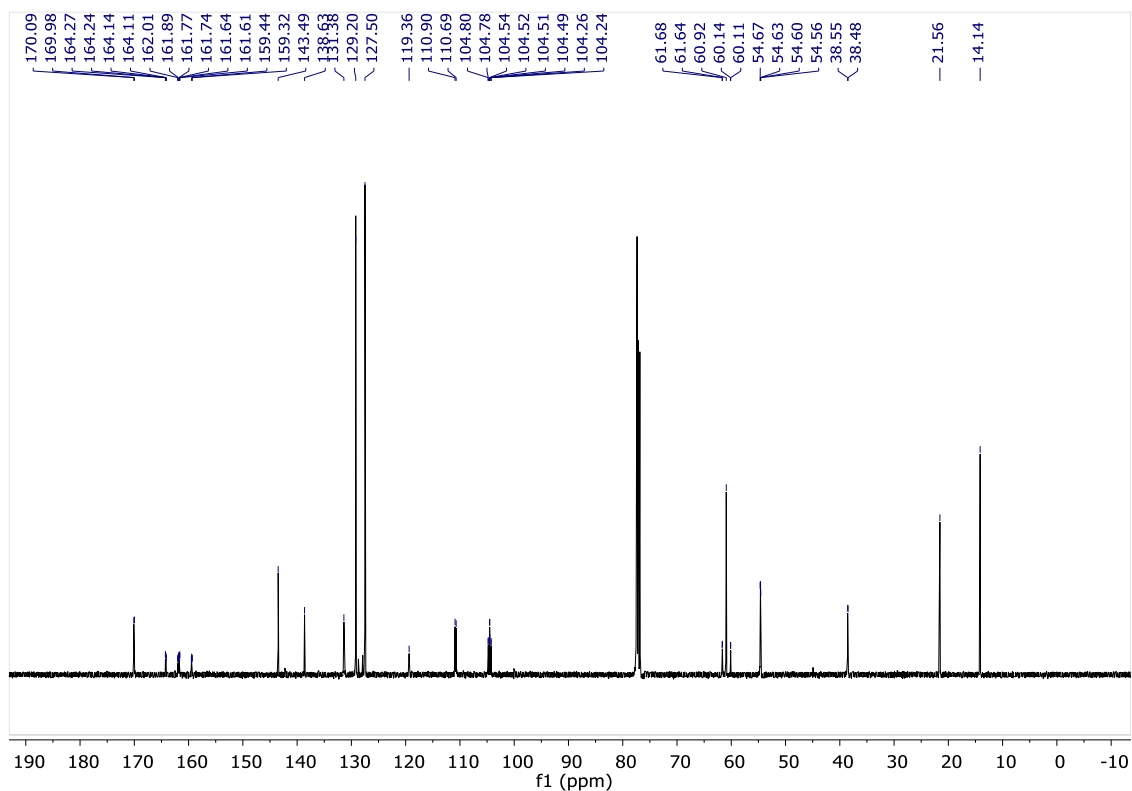

$^{31}\text{P}$  NMR (120 MHz,  $\text{CDCl}_3$ )

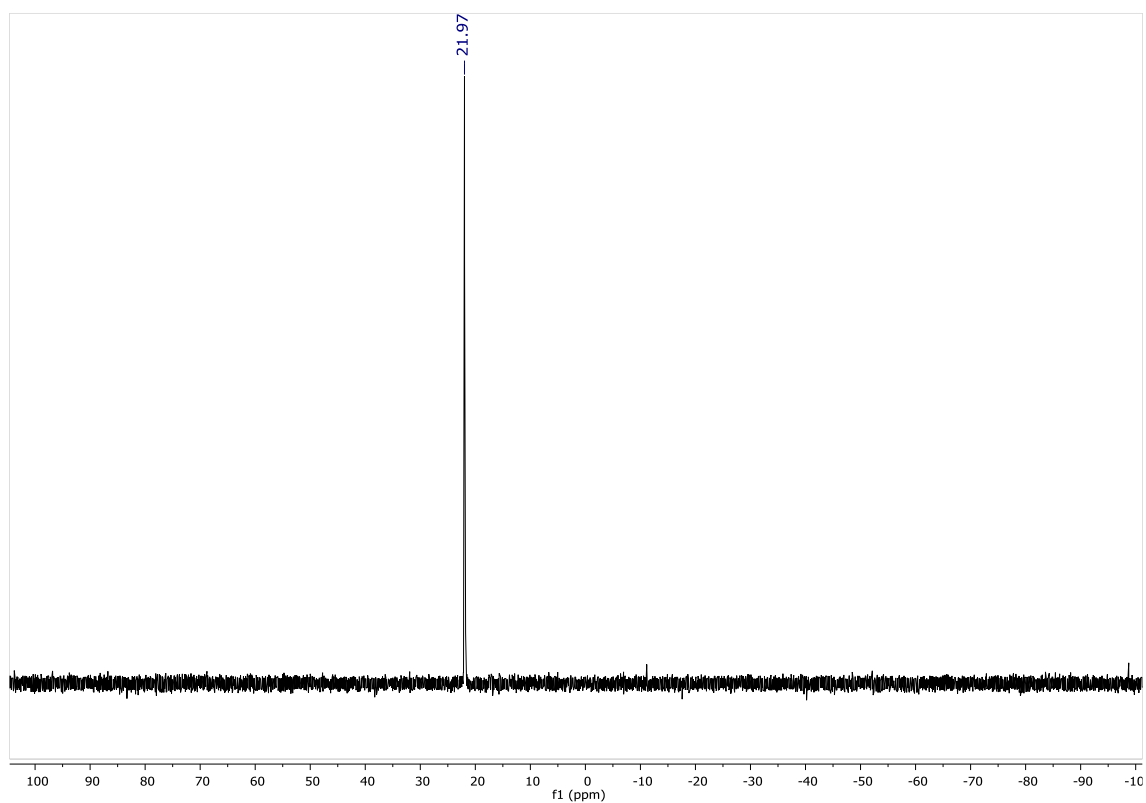

$^{19}\text{F}$  NMR (282 MHz,  $\text{CDCl}_3$ )

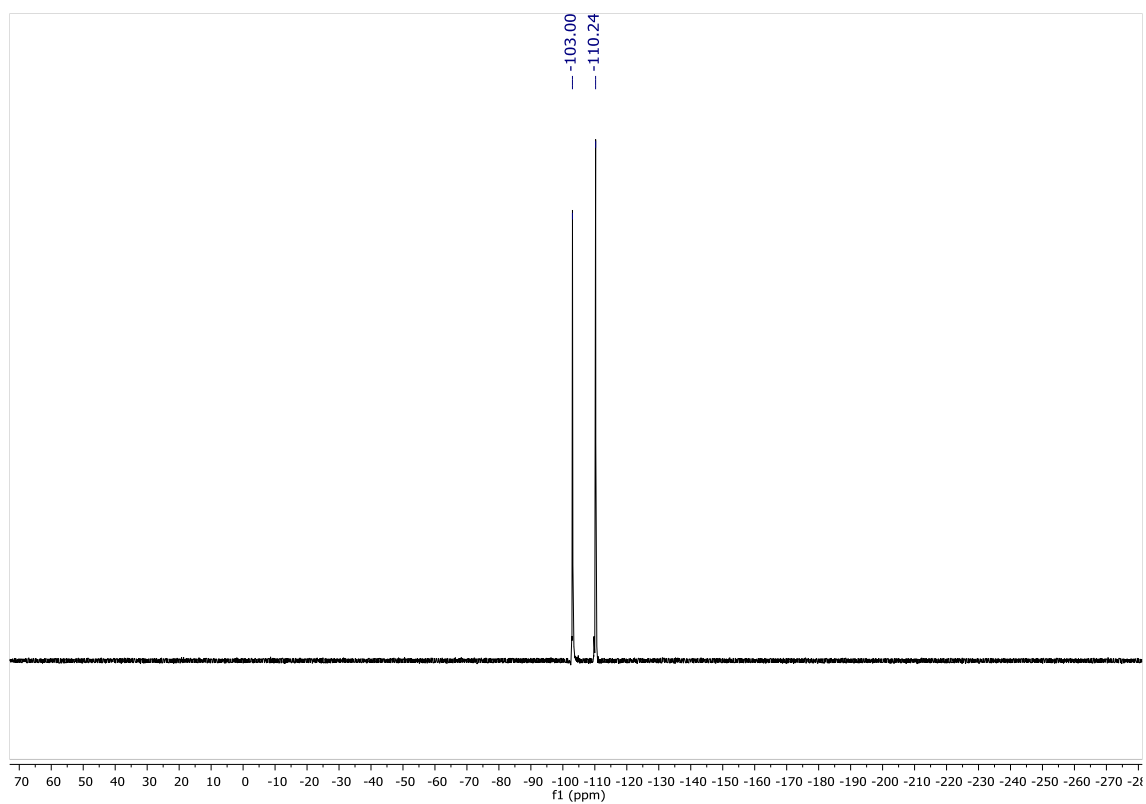

Ethyl 3-(3,4-difluorophenyl)-3-(dimethoxyphosphoryl)-3-((4-methylphenyl)sulfonamido)propanoate (7n)

$^1\text{H}$  NMR (400 MHz,  $\text{CDCl}_3$ )

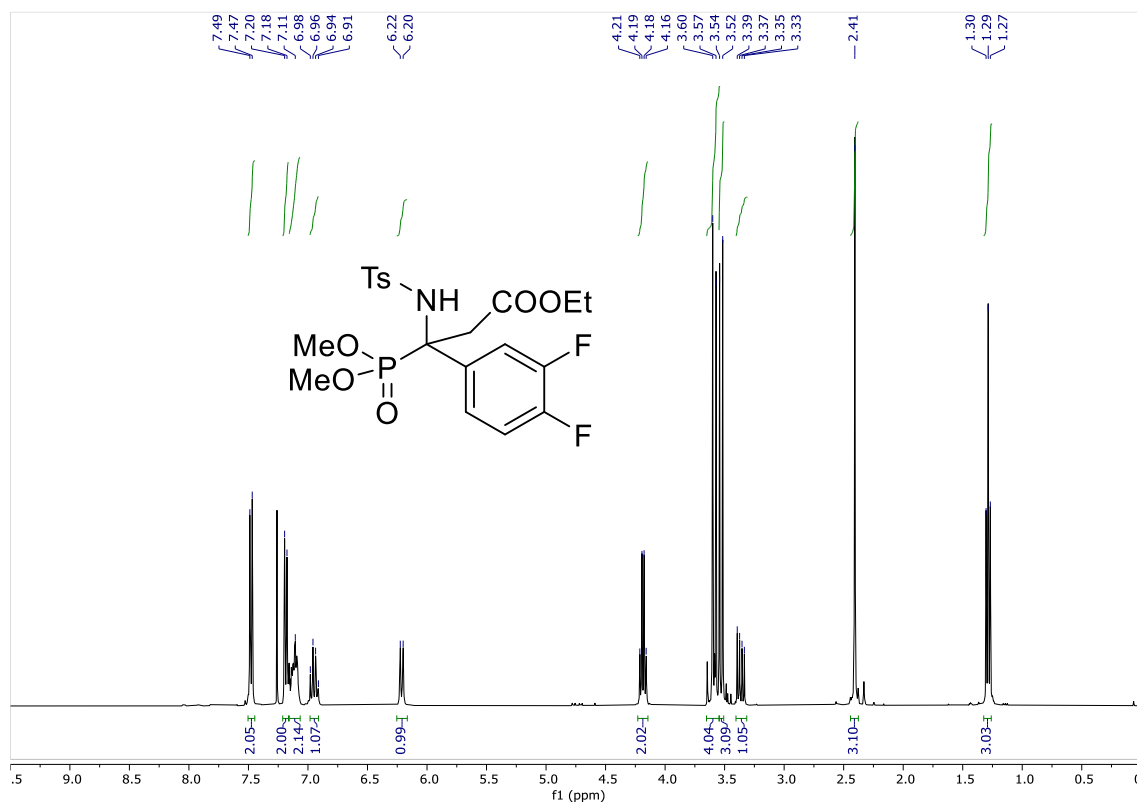

$^{13}\text{C}$  NMR  $\{^1\text{H}\}$  (101 MHz,  $\text{CDCl}_3$ )

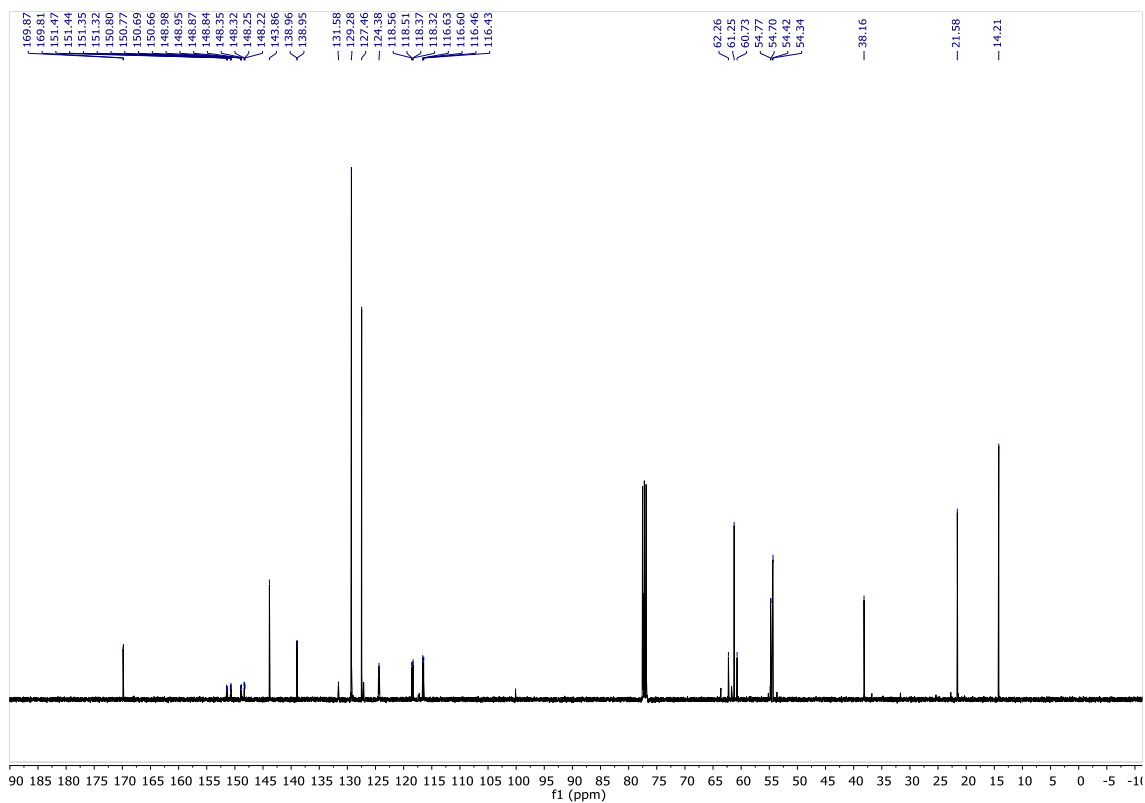

$^{31}\text{P}$  NMR (120 MHz,  $\text{CDCl}_3$ )

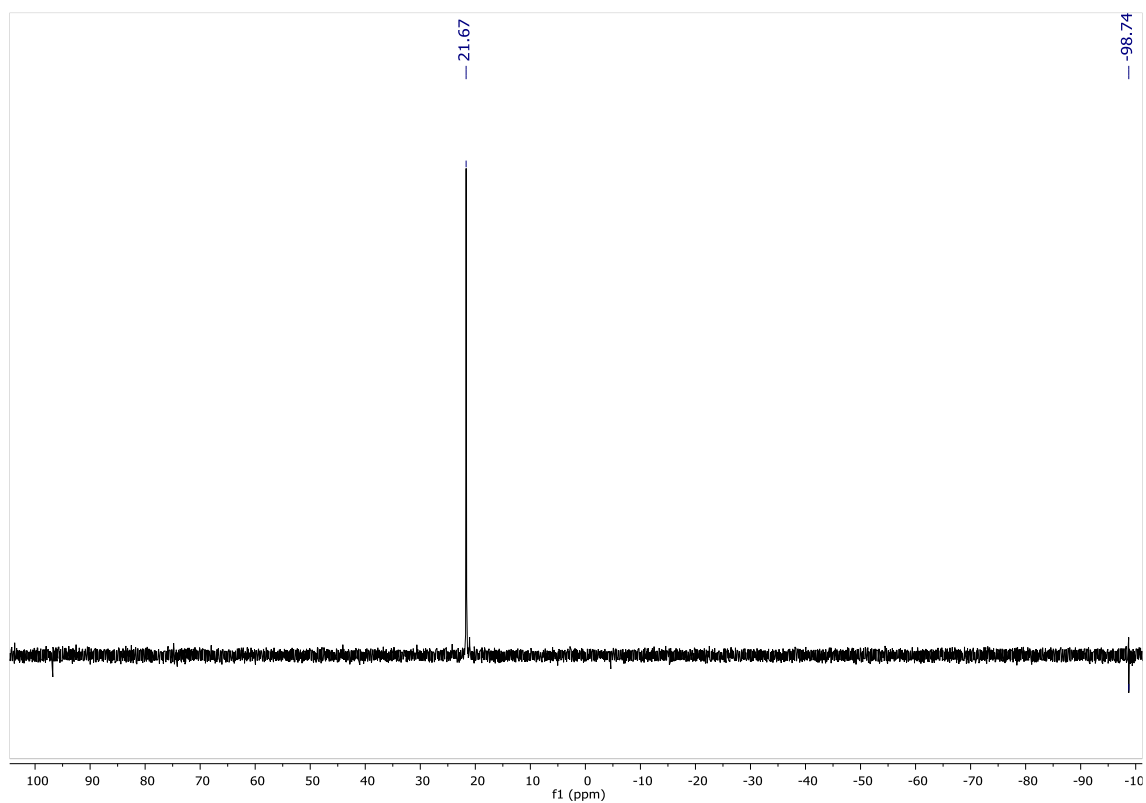

$^{19}\text{F}$  NMR (282 MHz,  $\text{CDCl}_3$ )

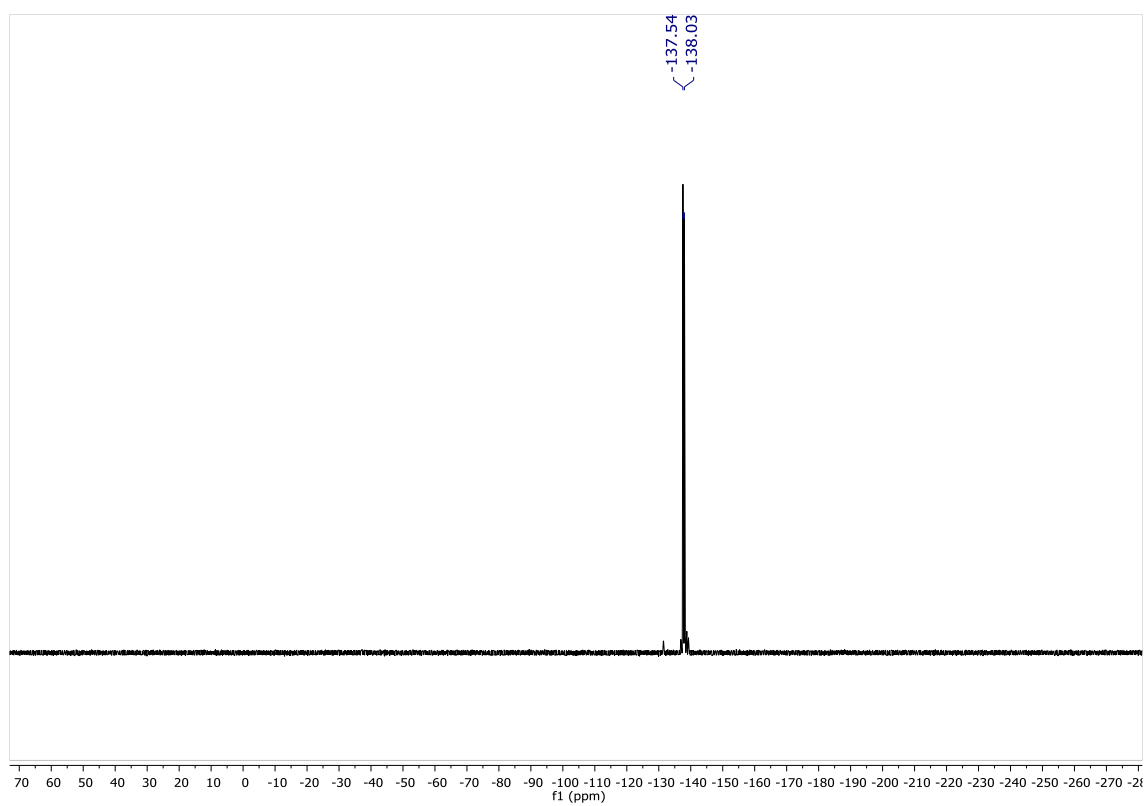

Ethyl 3-(dimethoxyphosphoryl)-3-((4-methylphenyl)sulfonamido)-3-(perfluorophenyl)propanoate (7o)

$^1\text{H}$  NMR (400 MHz,  $\text{CDCl}_3$ )

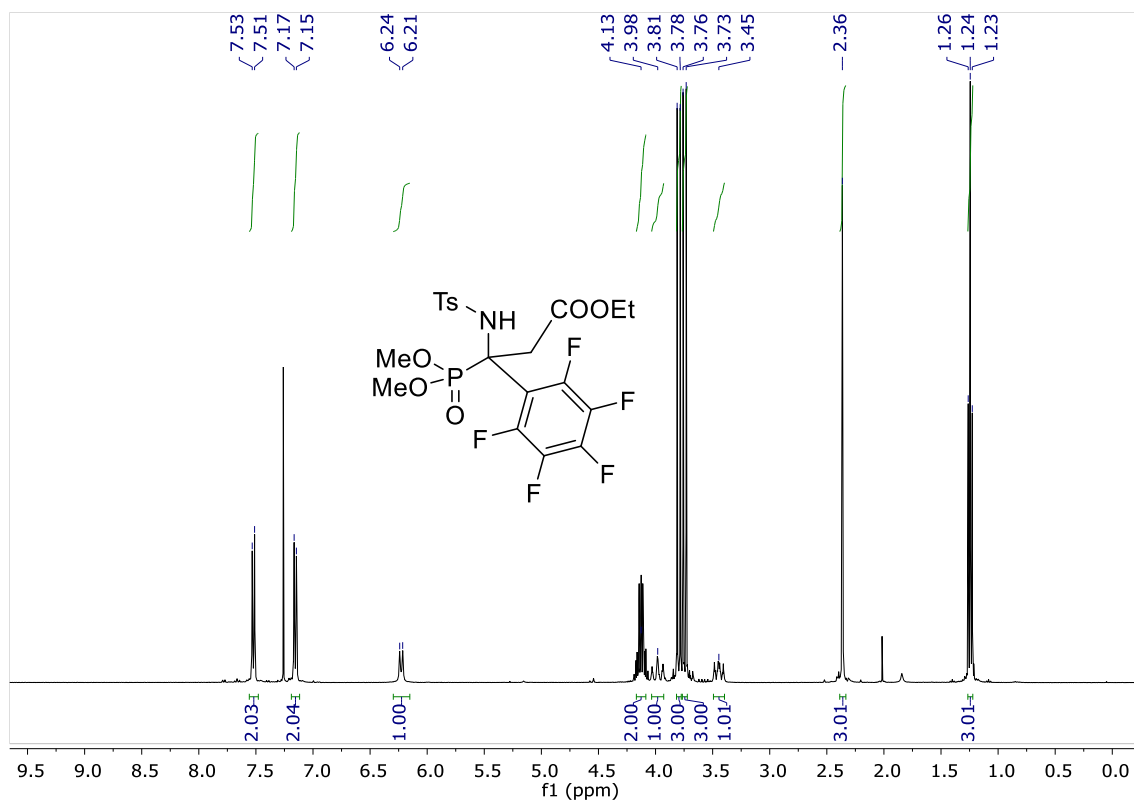

$^{13}\text{C}$  NMR [ $^1\text{H}$ ] (101 MHz,  $\text{CDCl}_3$ )

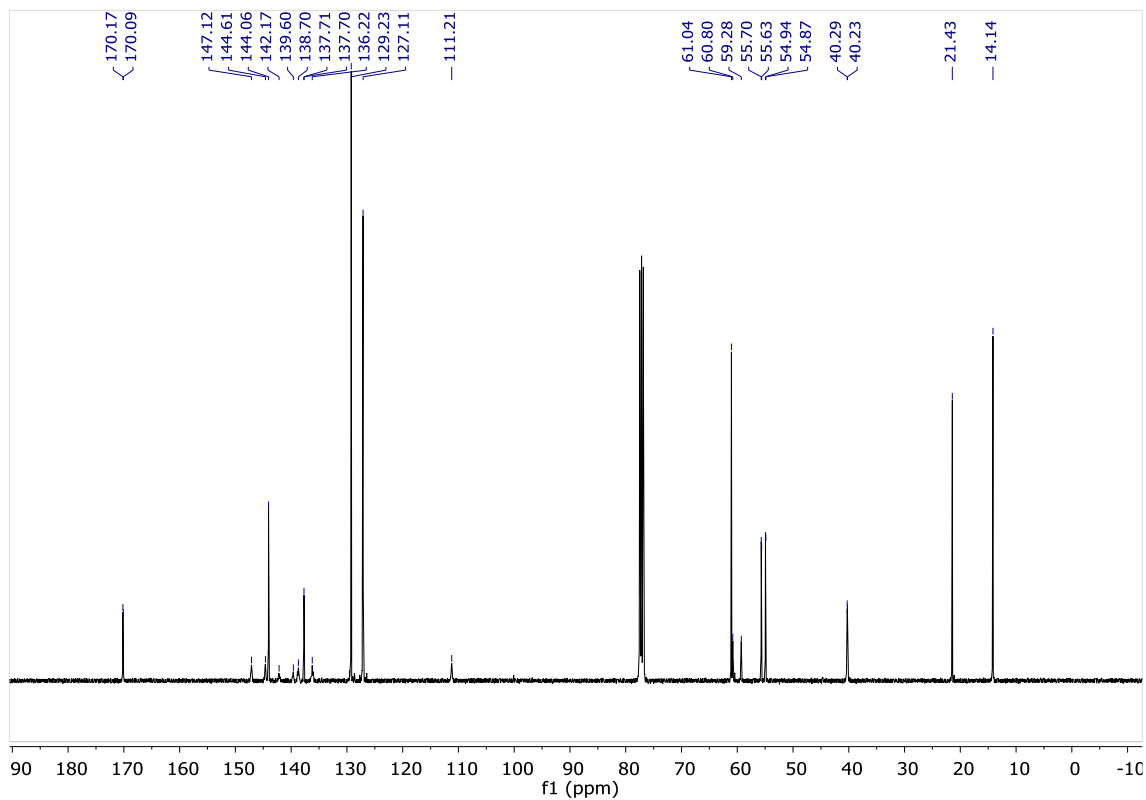



$^{31}\text{P}$  NMR (120 MHz,  $\text{CDCl}_3$ )

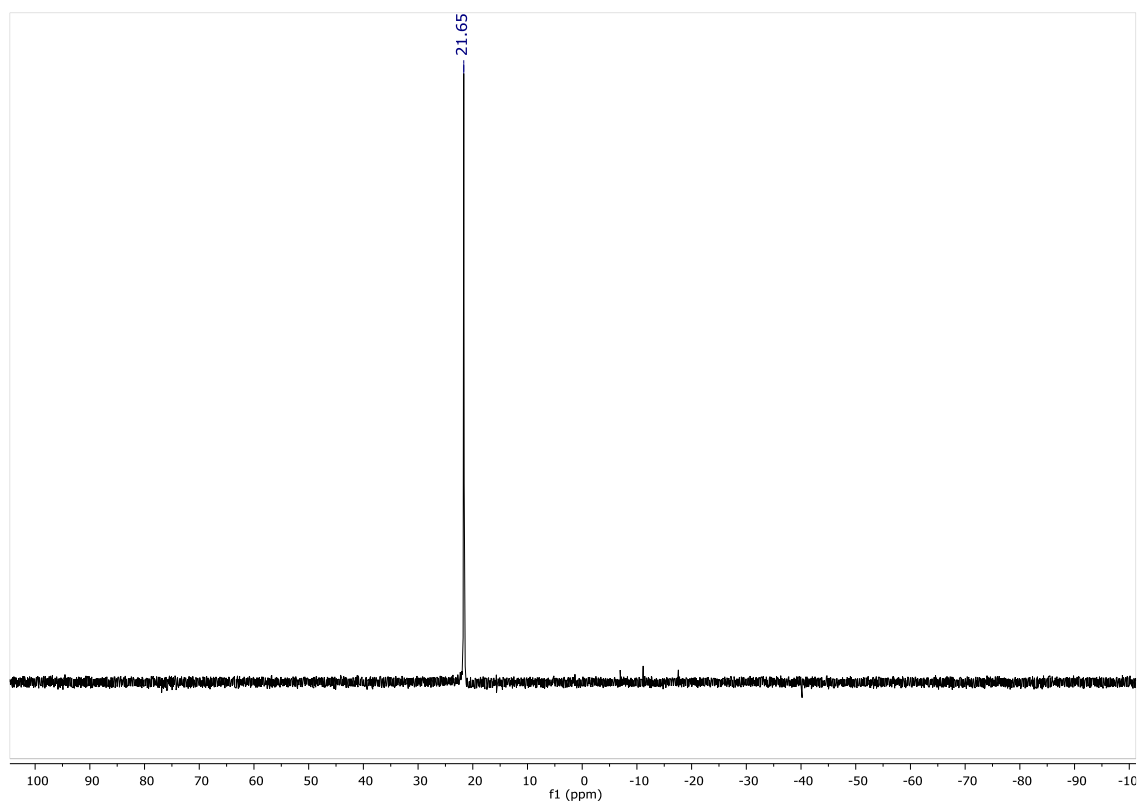

$^{19}\text{F}$  NMR (282 MHz,  $\text{CDCl}_3$ )

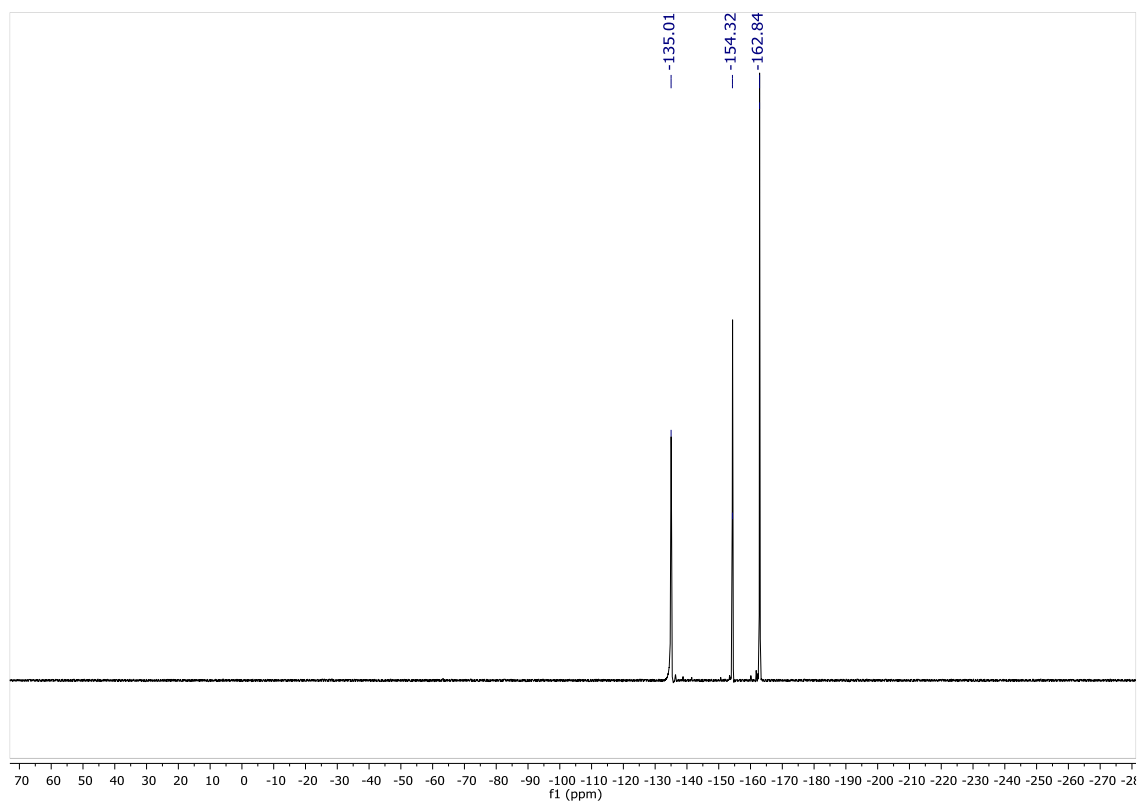

**Ethyl 3-(dimethoxyphosphoryl)-3-((4-methylphenyl)sulfonamido)-3-(4-(trifluoromethyl)phenyl)propanoate (7p)**

$^1\text{H}$  NMR (400 MHz,  $\text{CDCl}_3$ )

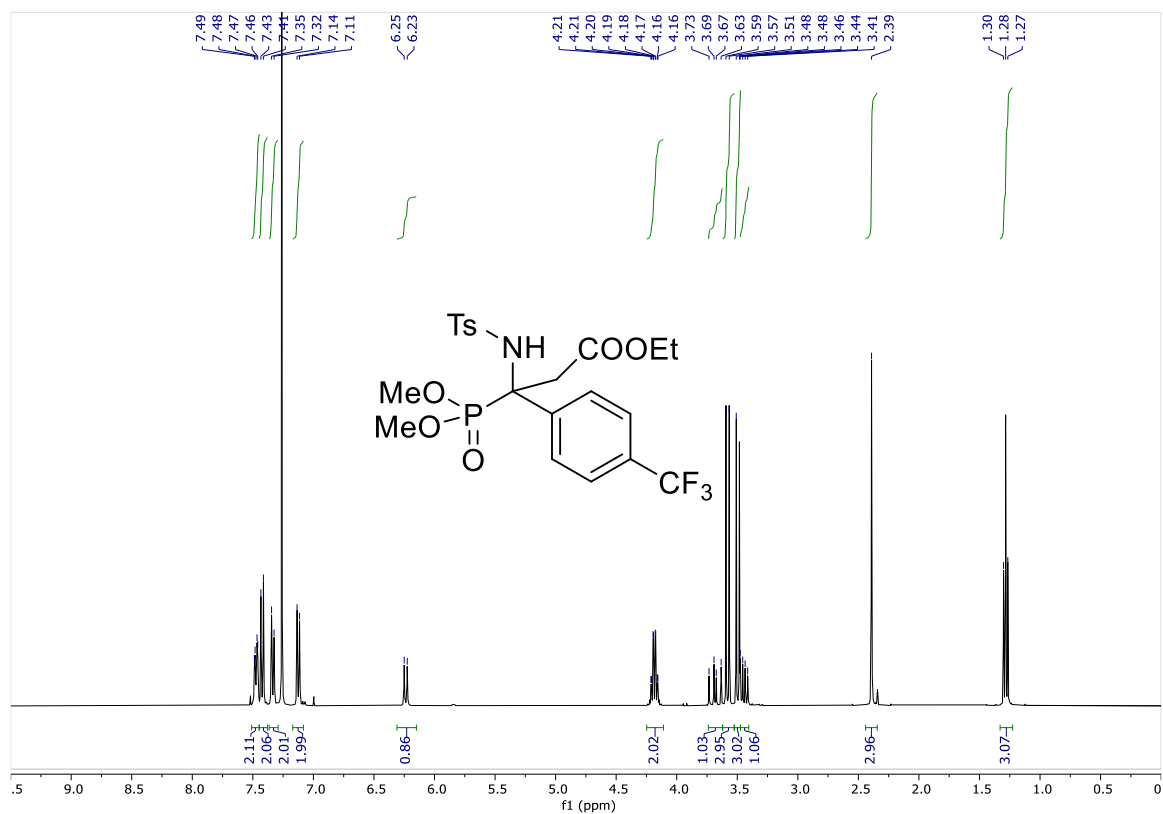

$^{13}\text{C}$  NMR [ $^1\text{H}$ ] (75 MHz,  $\text{CDCl}_3$ )

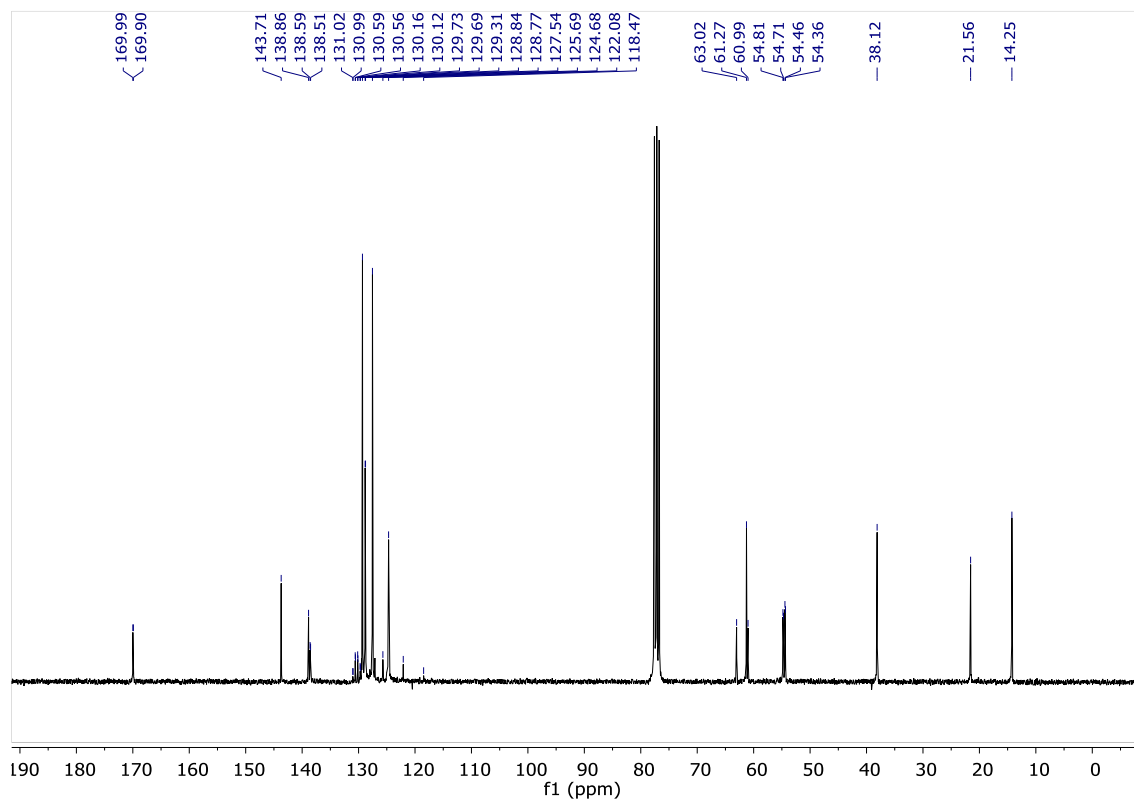

$^{31}\text{P}$  NMR (120 MHz,  $\text{CDCl}_3$ )

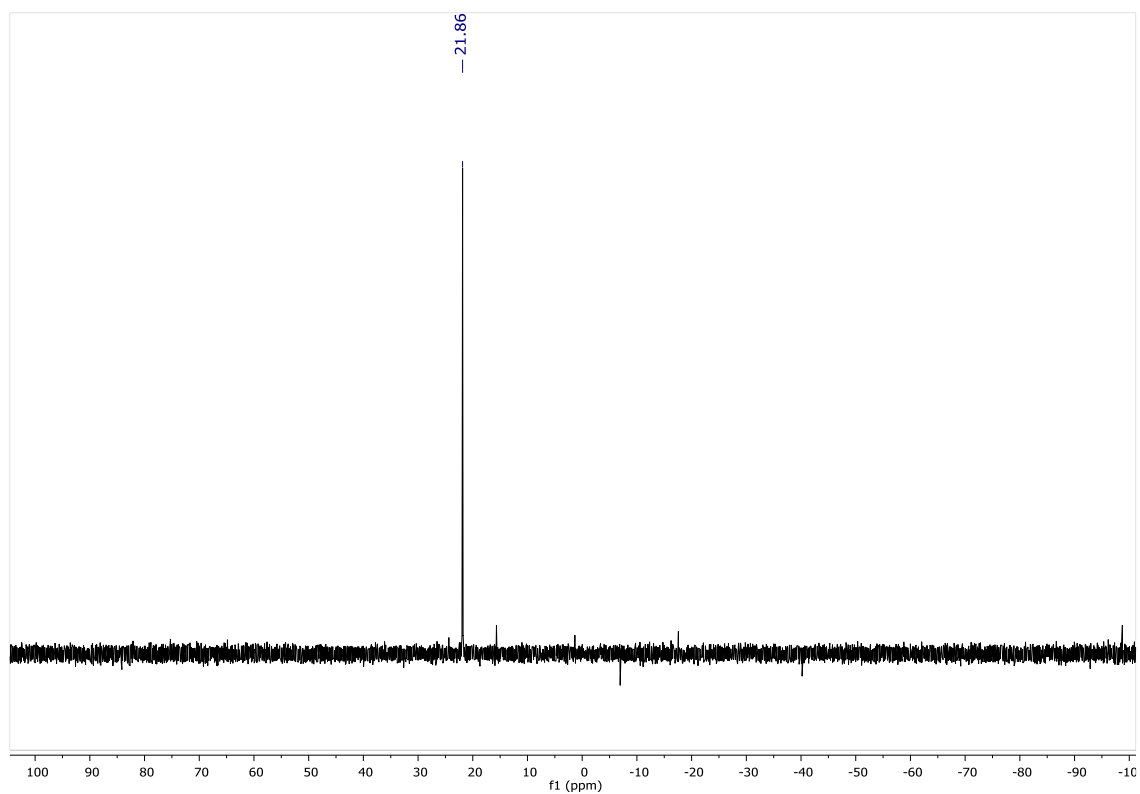

$^{19}\text{F}$  NMR (282 MHz,  $\text{CDCl}_3$ )

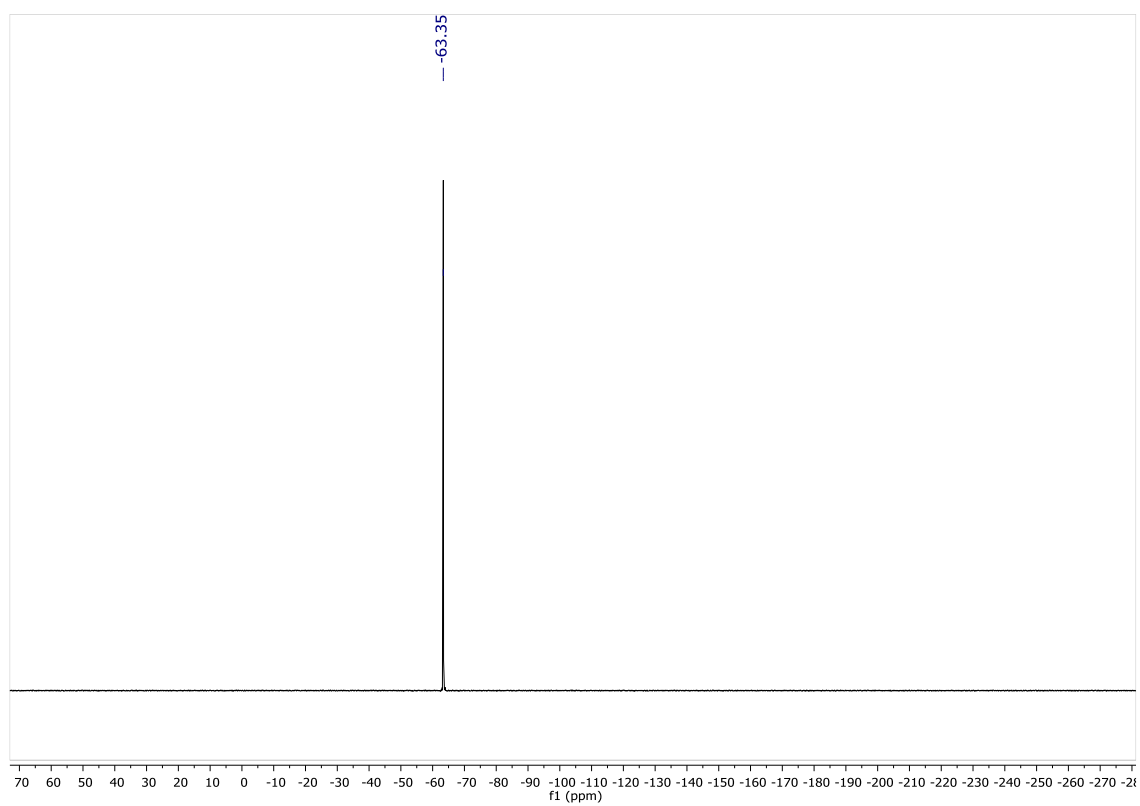

**Ethyl 3-(dimethoxyphosphoryl)-3-((4-methylphenyl)sulfonamido)-3-(4-nitrophenyl)propanoate (7q)**

$^1\text{H}$  NMR (400 MHz,  $\text{CDCl}_3$ )

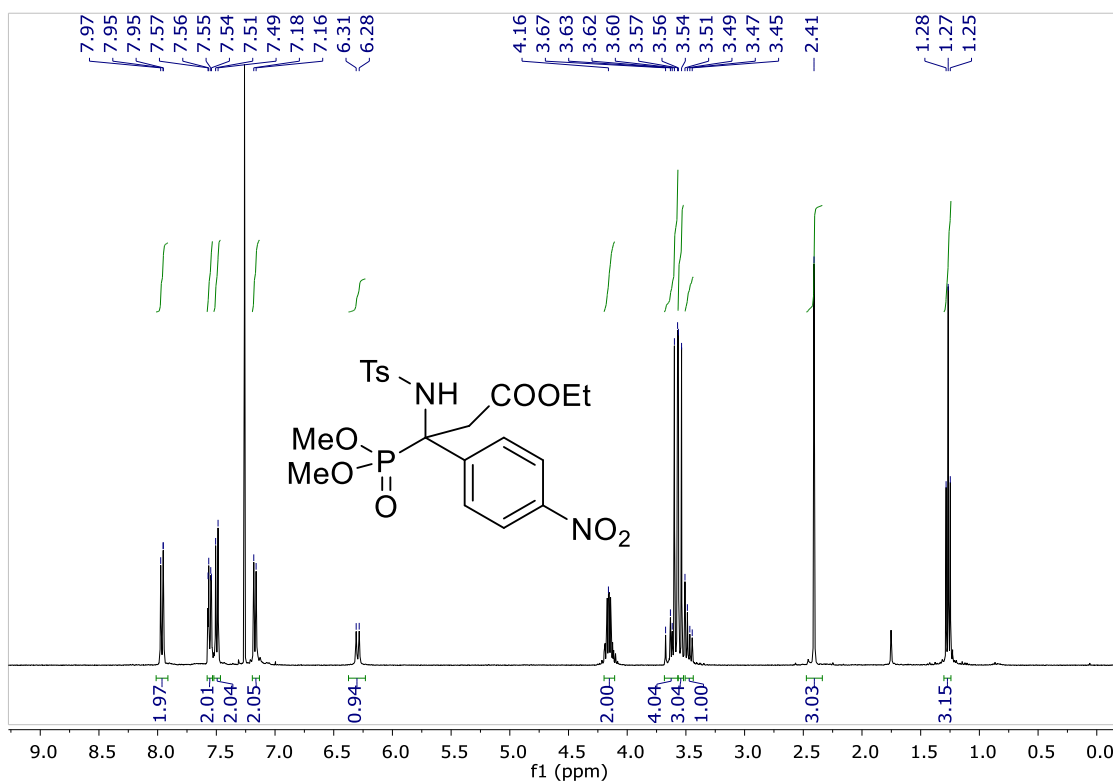

$^{13}\text{C}$  NMR [ $^1\text{H}$ ] (101 MHz,  $\text{CDCl}_3$ )

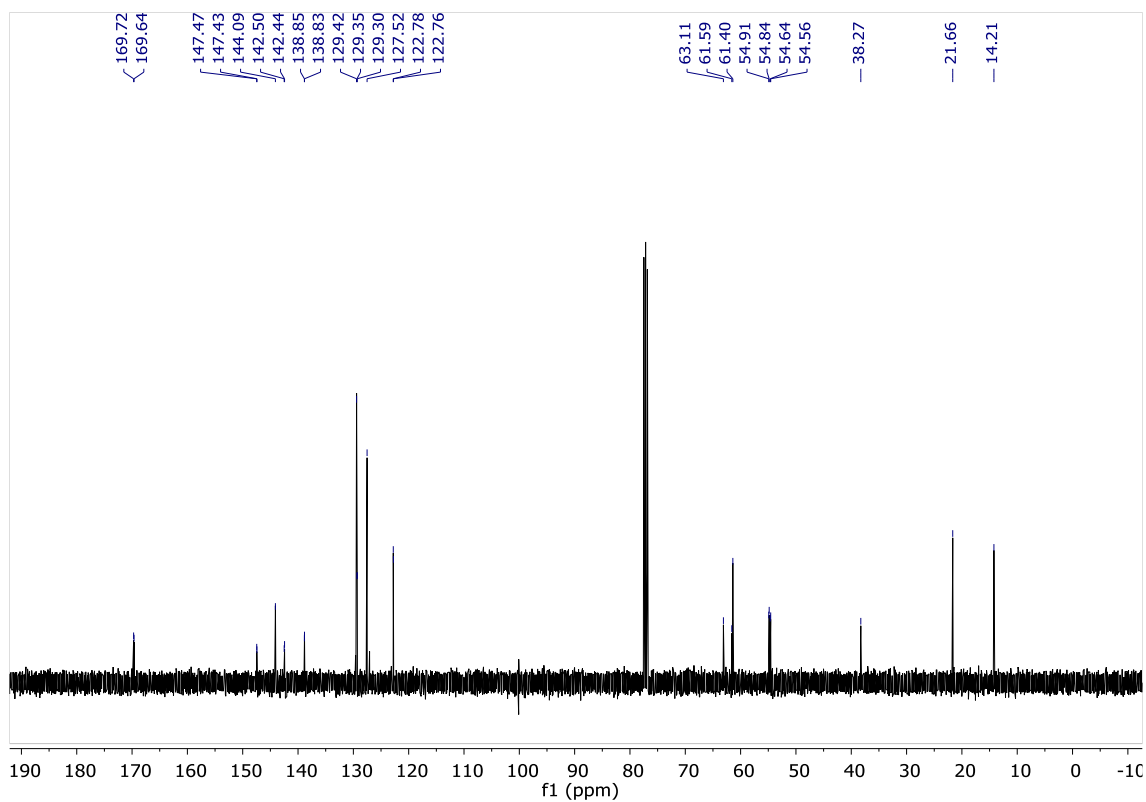

$^{31}\text{P}$  NMR (120 MHz,  $\text{CDCl}_3$ )

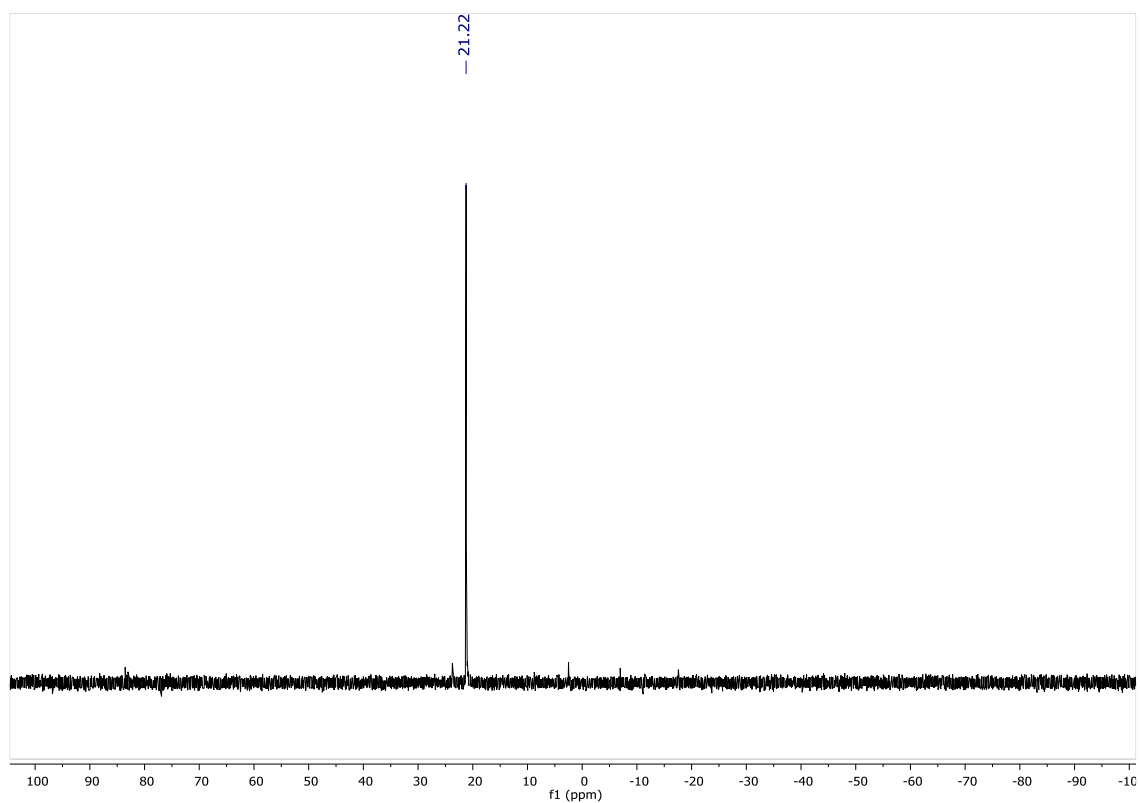

Ethyl 3-(5-chlorothiophen-2-yl)-3-(dimethoxyphosphoryl)-3-((4-methylphenyl)sulfonamido)propanoate (7r)

$^1\text{H}$  NMR (400 MHz,  $\text{CDCl}_3$ )

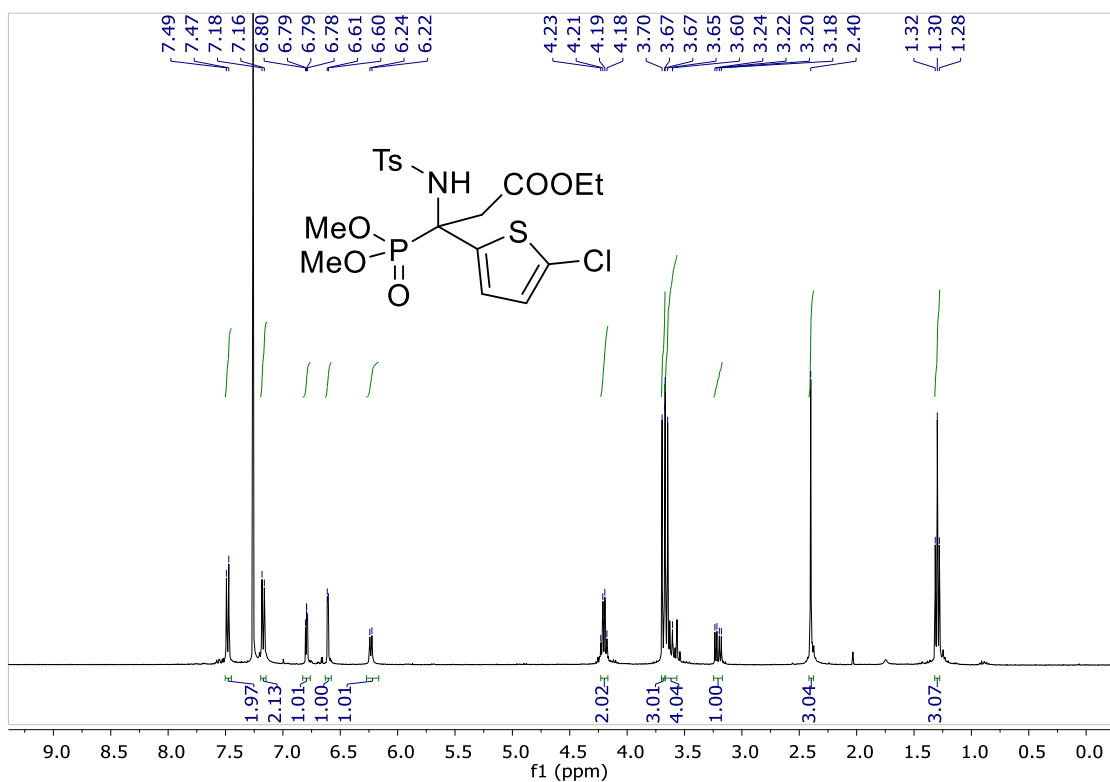

$^{13}\text{C}$  NMR  $\{^1\text{H}\}$  (101 MHz,  $\text{CDCl}_3$ )

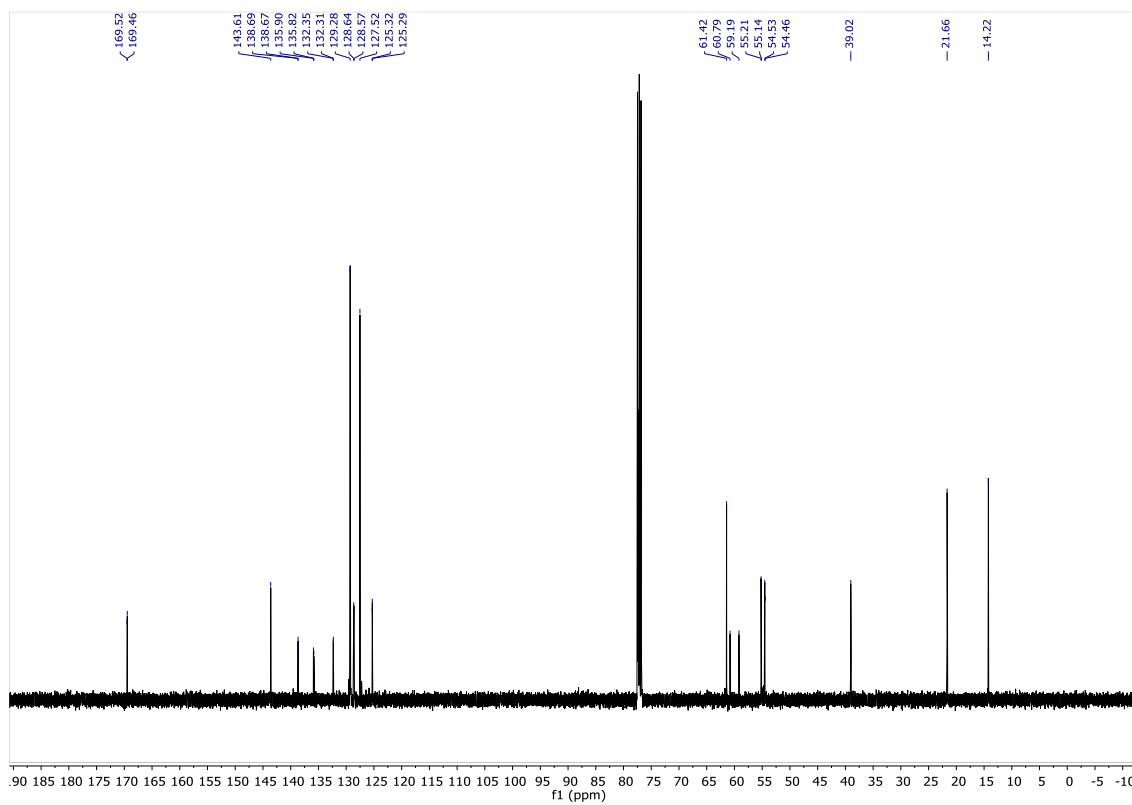

$^{31}\text{P}$  NMR (120 MHz,  $\text{CDCl}_3$ )

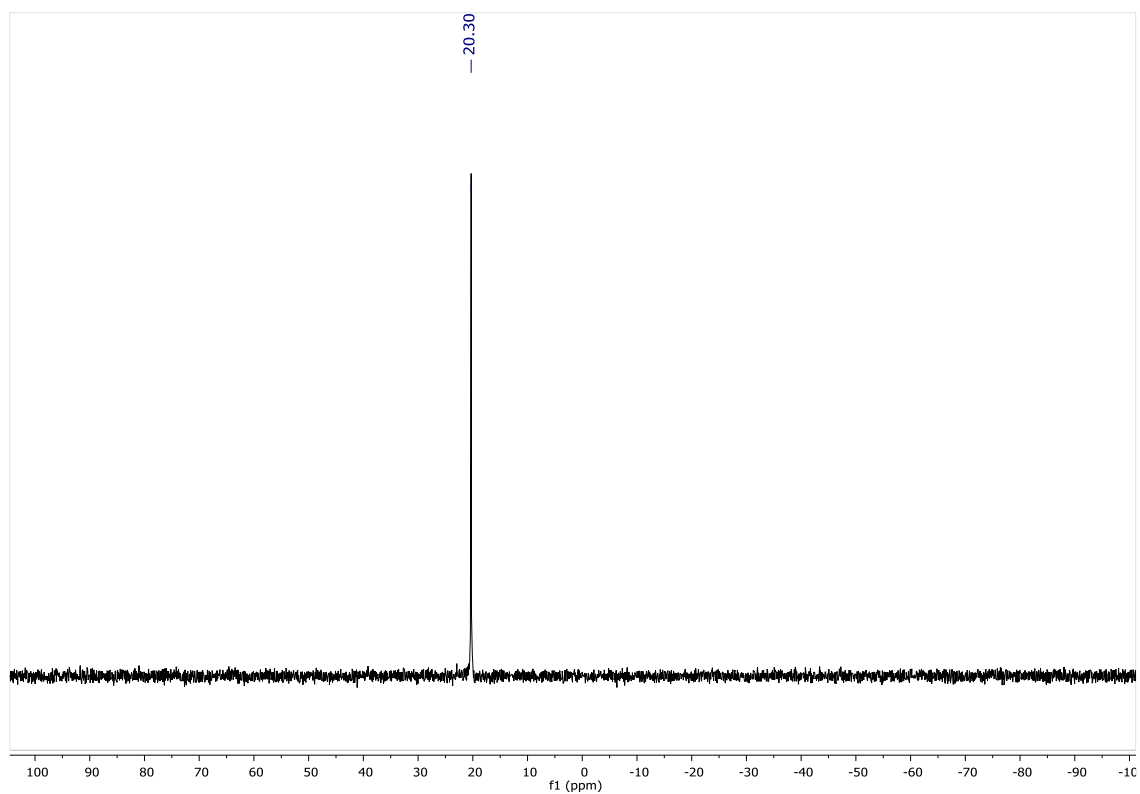

Ethyl 3-([1,1'-biphenyl]-4-yl)-3-(dimethoxyphosphoryl)-3-((4-methylphenyl)sulfonamido)propanoate (7s)

$^1\text{H}$  NMR (400 MHz,  $\text{CDCl}_3$ )

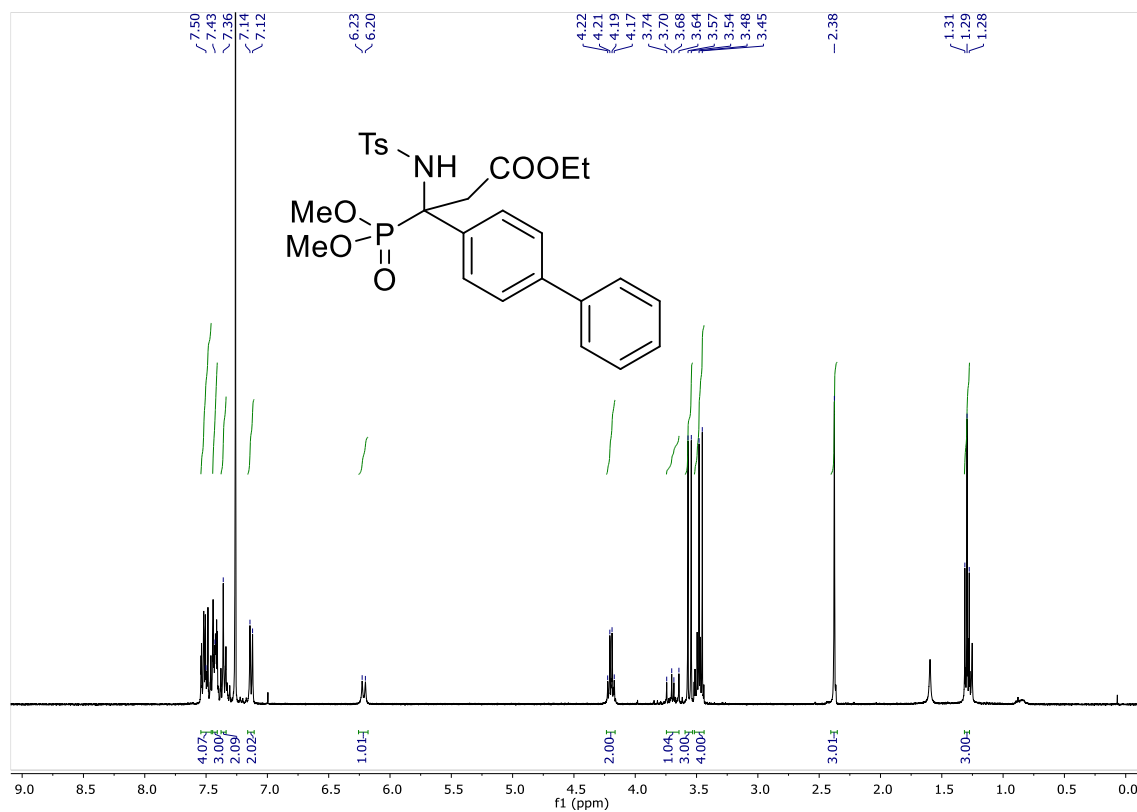

$^{13}\text{C}$  NMR  $\{^1\text{H}\}$  (101 MHz,  $\text{CDCl}_3$ )

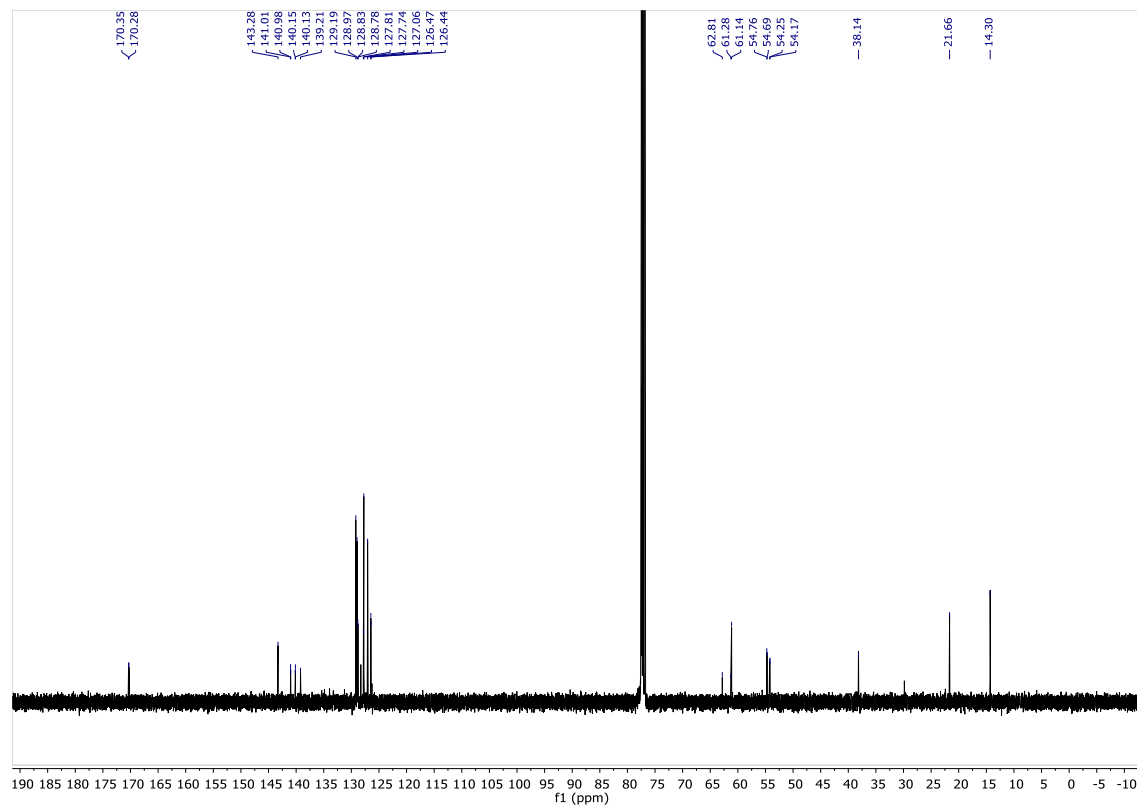



$^{31}\text{P}$  NMR (120 MHz,  $\text{CDCl}_3$ )

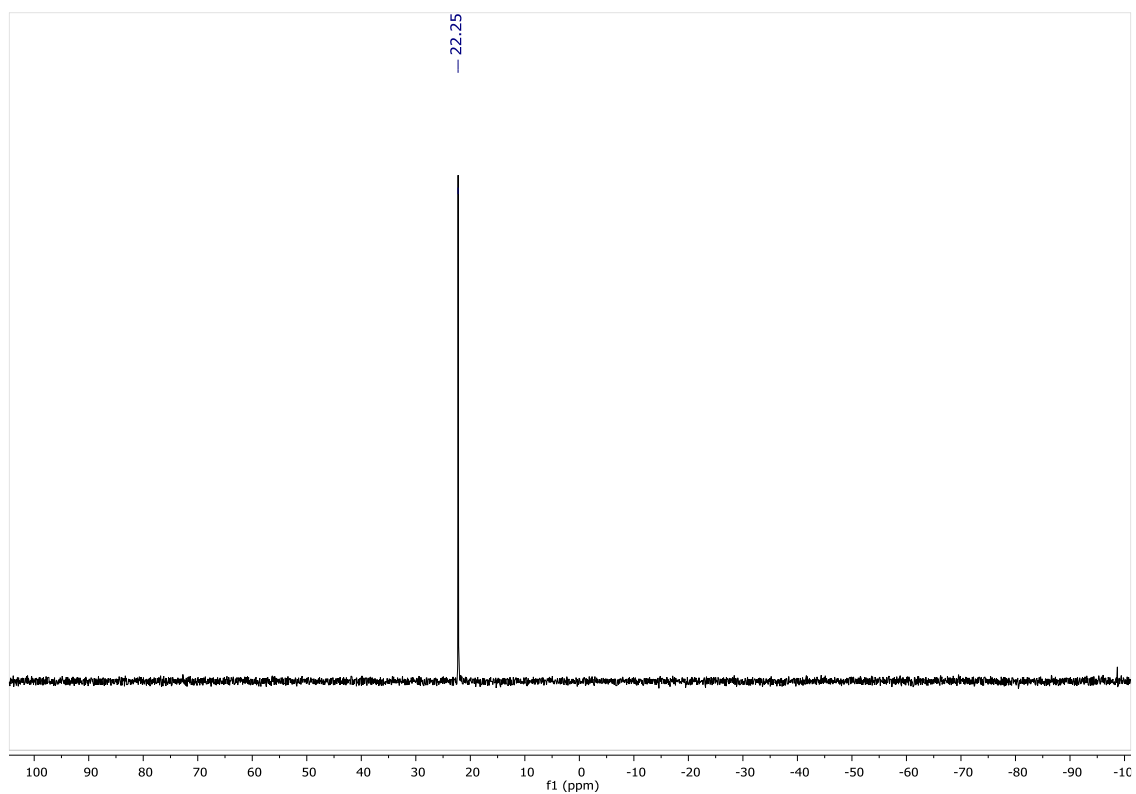

### 3. $^1\text{H}$ NMR, $^{13}\text{C}$ NMR, $^{31}\text{P}$ NMR and $^{19}\text{F}$ NMR spectra of compounds 12, 13 and 14

Methyl 3-(dimethoxyphosphoryl)-3-(3-fluorophenyl)-3-((4-methylphenyl)sulfonamido)propanoate (12)

$^1\text{H}$  NMR (400 MHz,  $\text{CDCl}_3$ )

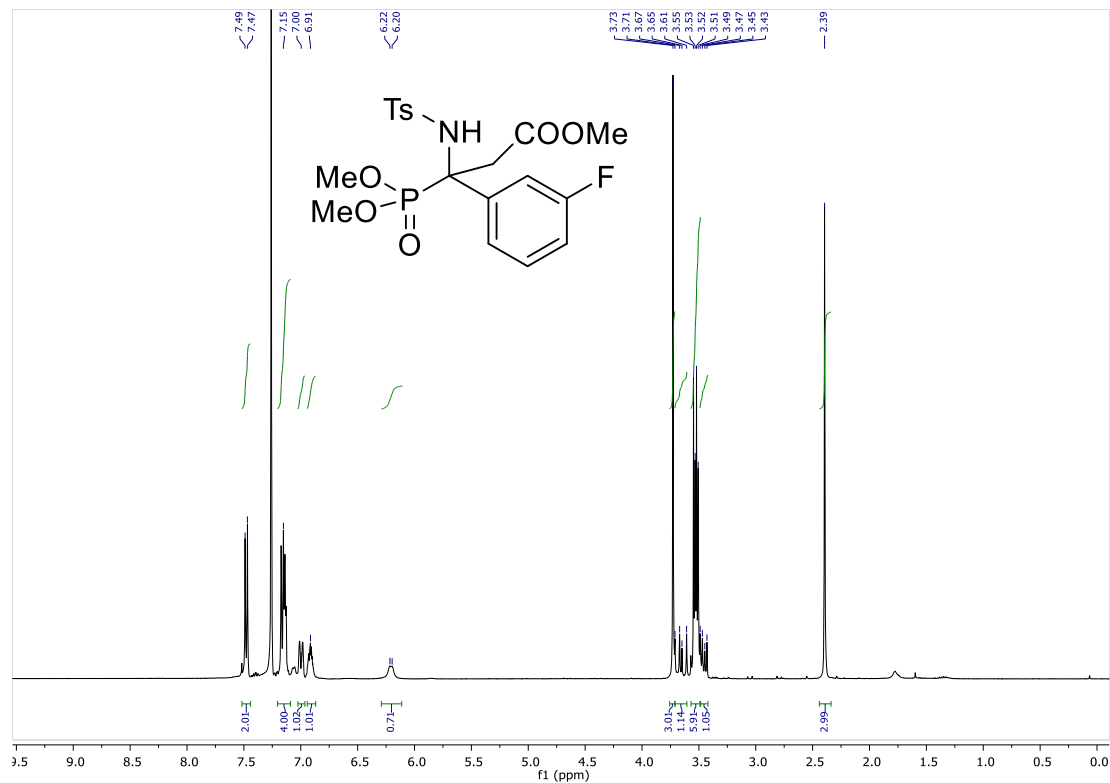

$^{13}\text{C}$  NMR  $\{^1\text{H}\}$  (101 MHz,  $\text{CDCl}_3$ )

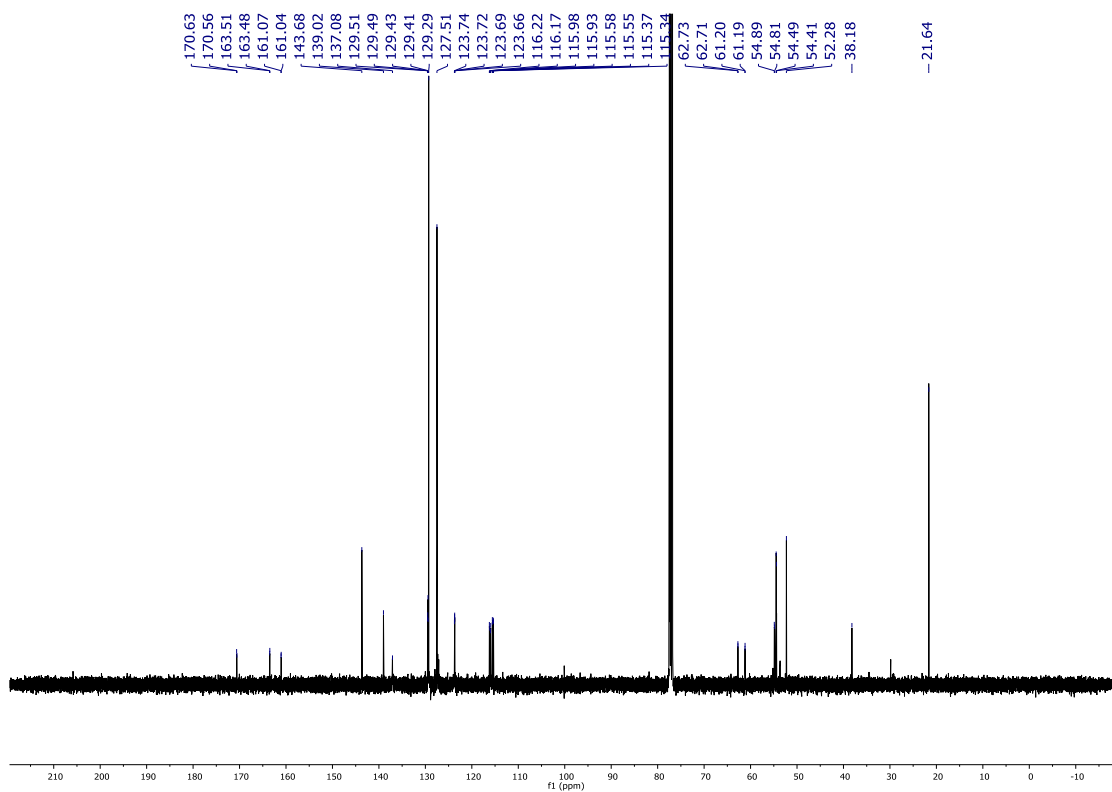

$^{31}\text{P}$  NMR (120 MHz,  $\text{CDCl}_3$ )

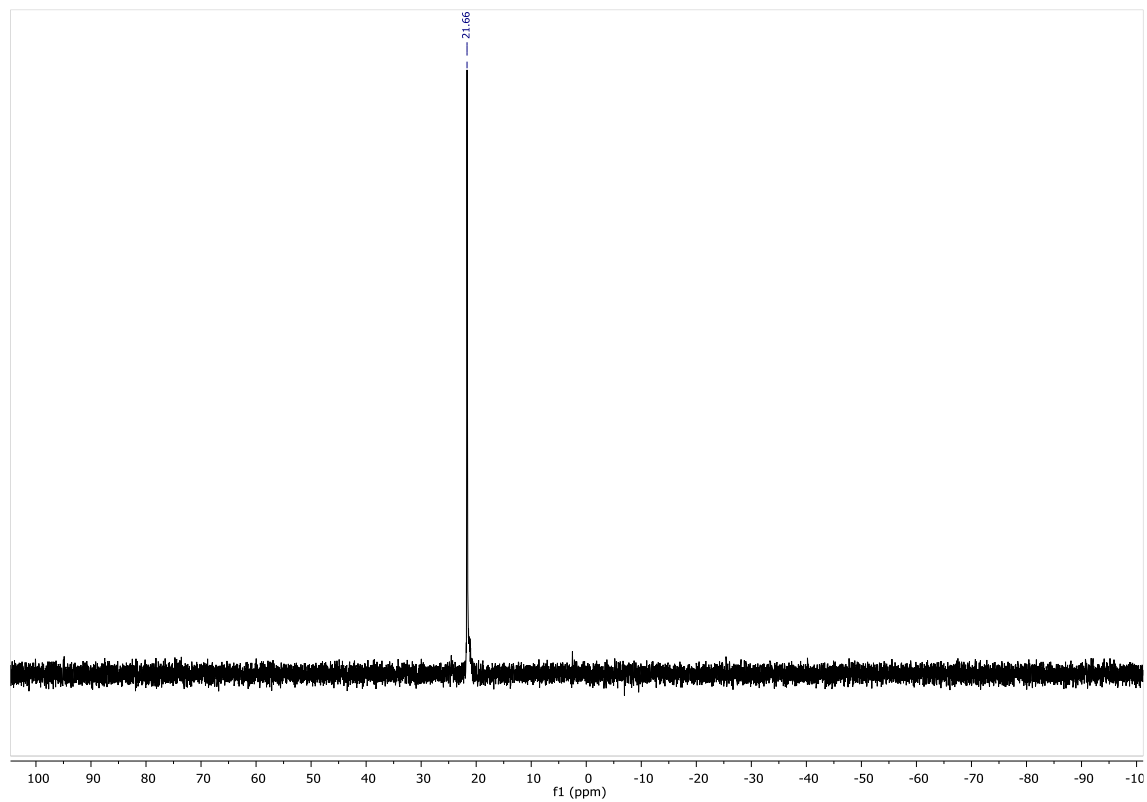

$^{19}\text{F}$  NMR (282 MHz,  $\text{CDCl}_3$ )

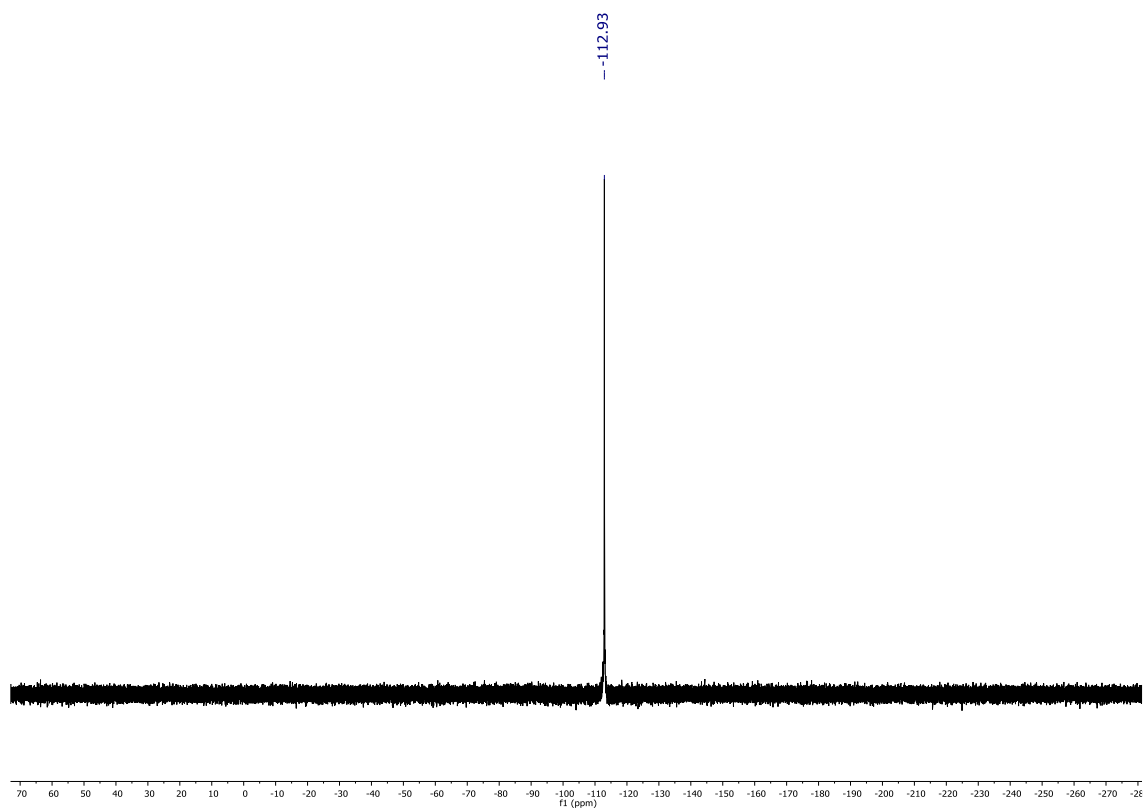

**Benzyl 3-(dimethoxyphosphoryl)-3-(3-fluorophenyl)-3-((4-methylphenyl)sulfonamido)propanoate (13a)**

$^1\text{H}$  NMR (400 MHz,  $\text{CDCl}_3$ )

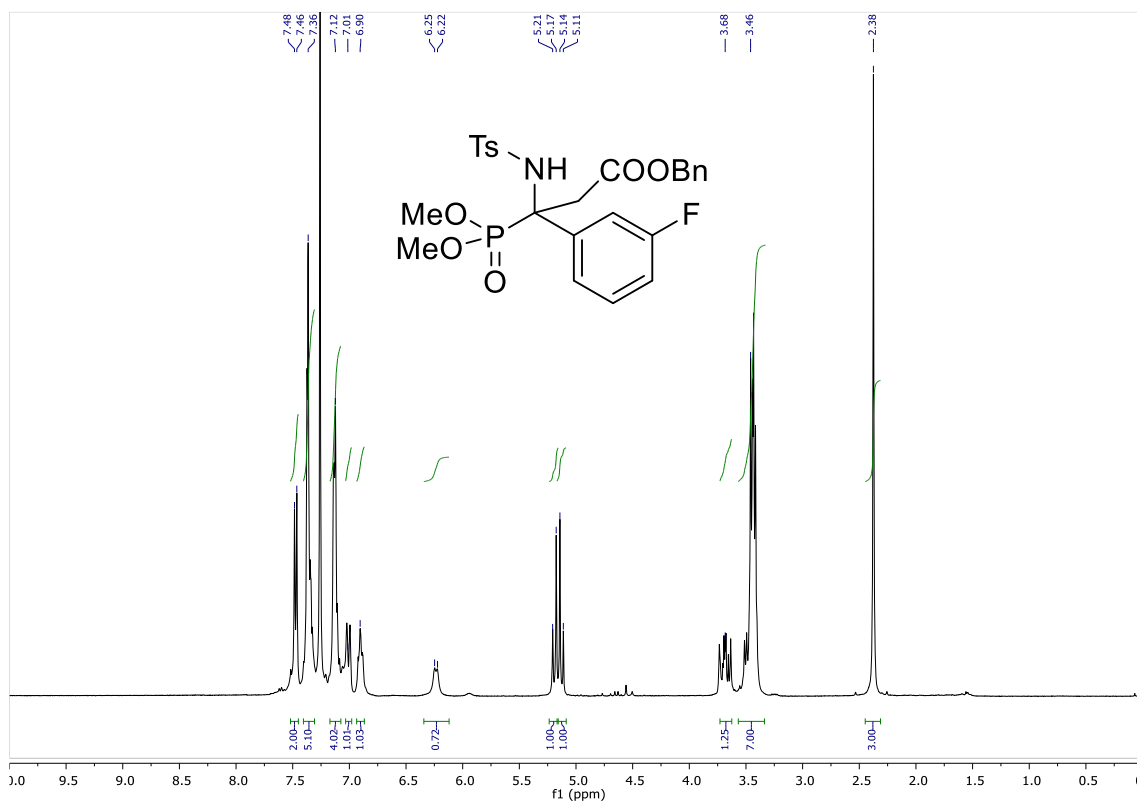

$^{13}\text{C}$  NMR  $\{^1\text{H}\}$  (101 MHz,  $\text{CDCl}_3$ )

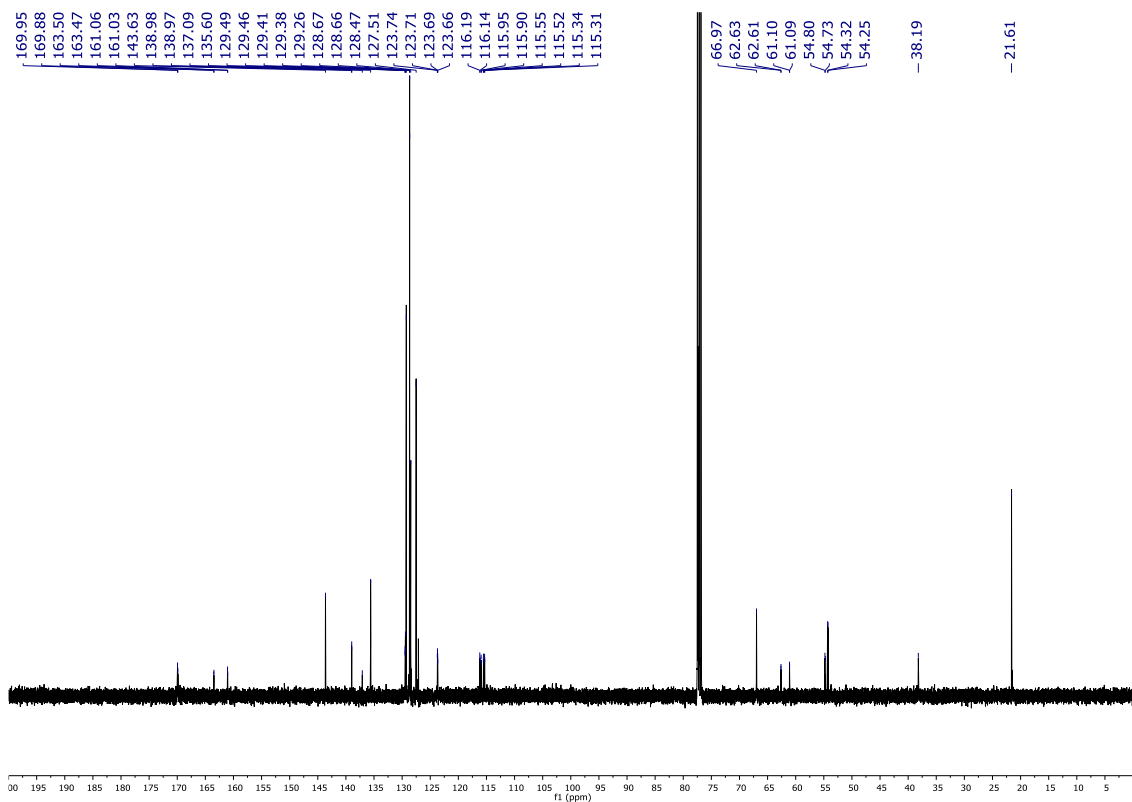

$^{31}\text{P}$  NMR (120 MHz,  $\text{CDCl}_3$ )

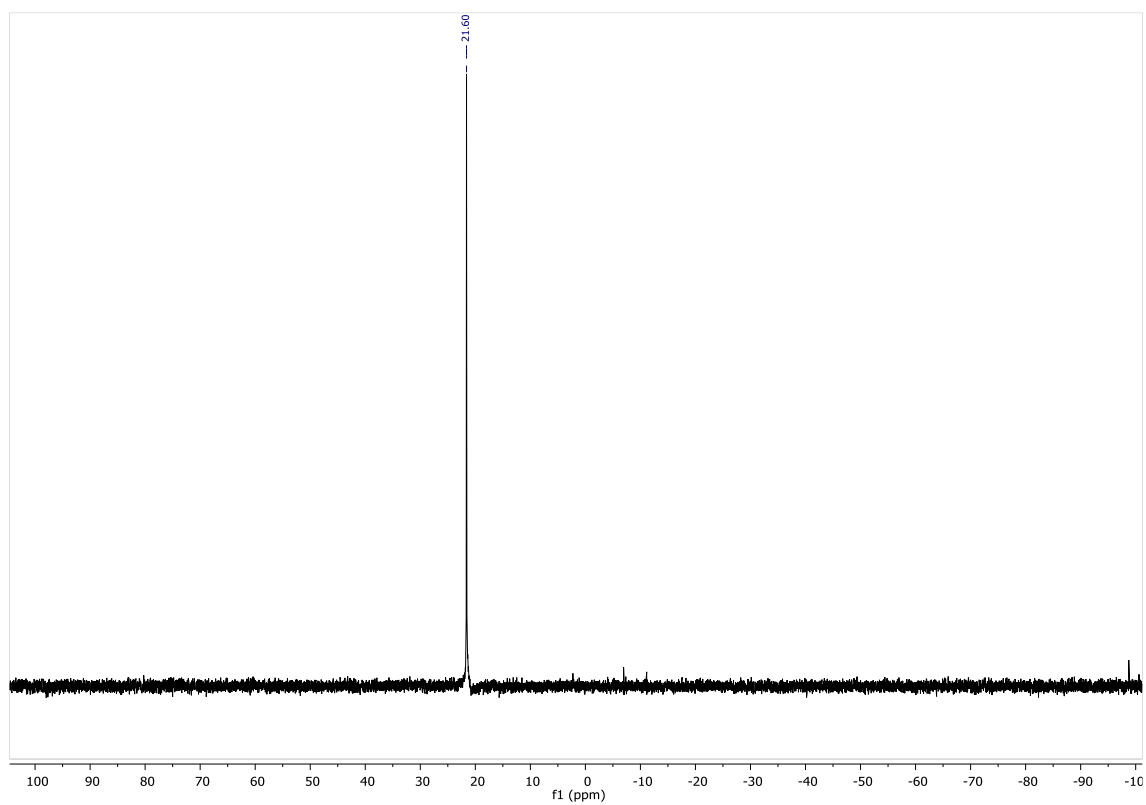

$^{19}\text{F}$  NMR (282 MHz,  $\text{CDCl}_3$ )

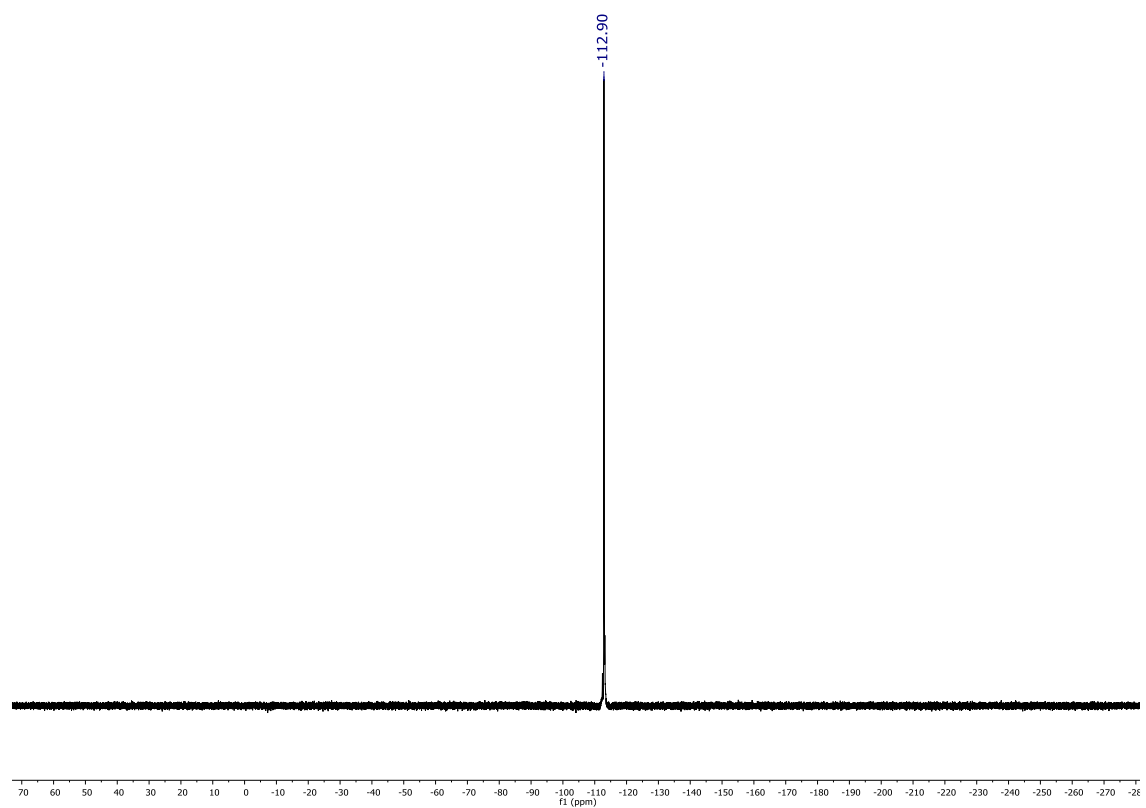

**Benzyl 3-(dimethoxyphosphoryl)-3-((4-methylphenyl)sulfonamido)-3-phenylpropanoate (13b)**

$^1\text{H}$  NMR (400 MHz,  $\text{CDCl}_3$ )

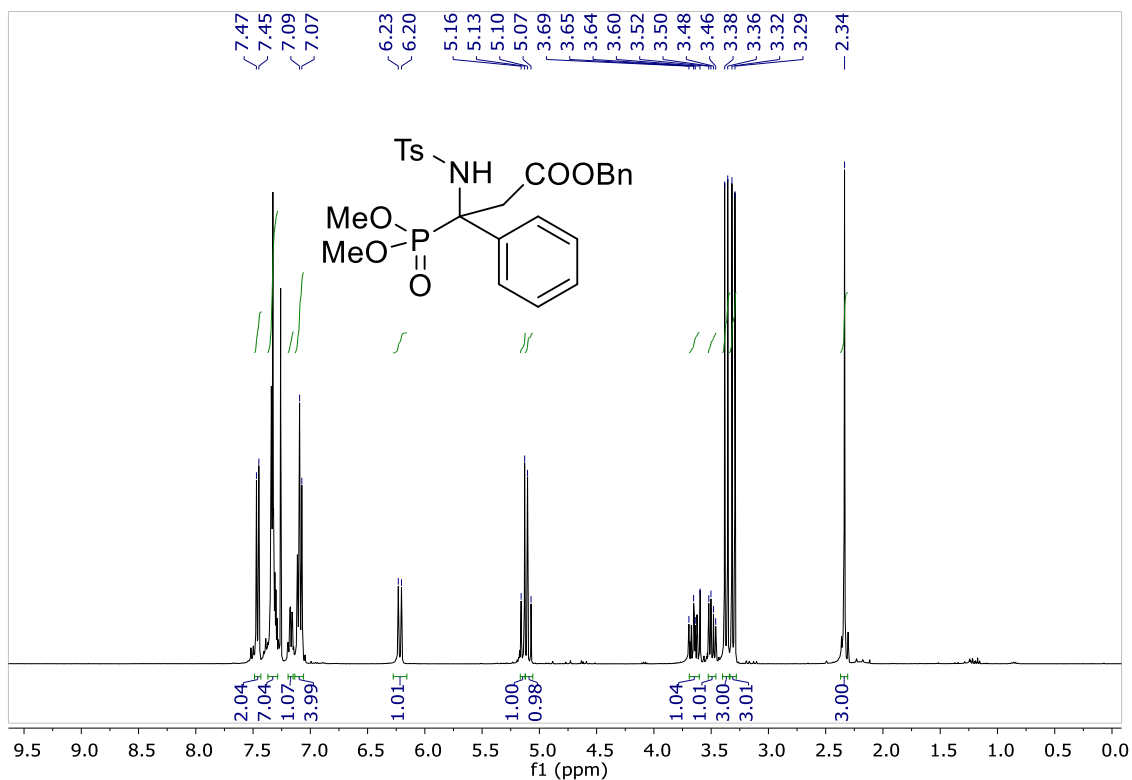

$^{13}\text{C}$  NMR  $\{^1\text{H}\}$  (101 MHz,  $\text{CDCl}_3$ )

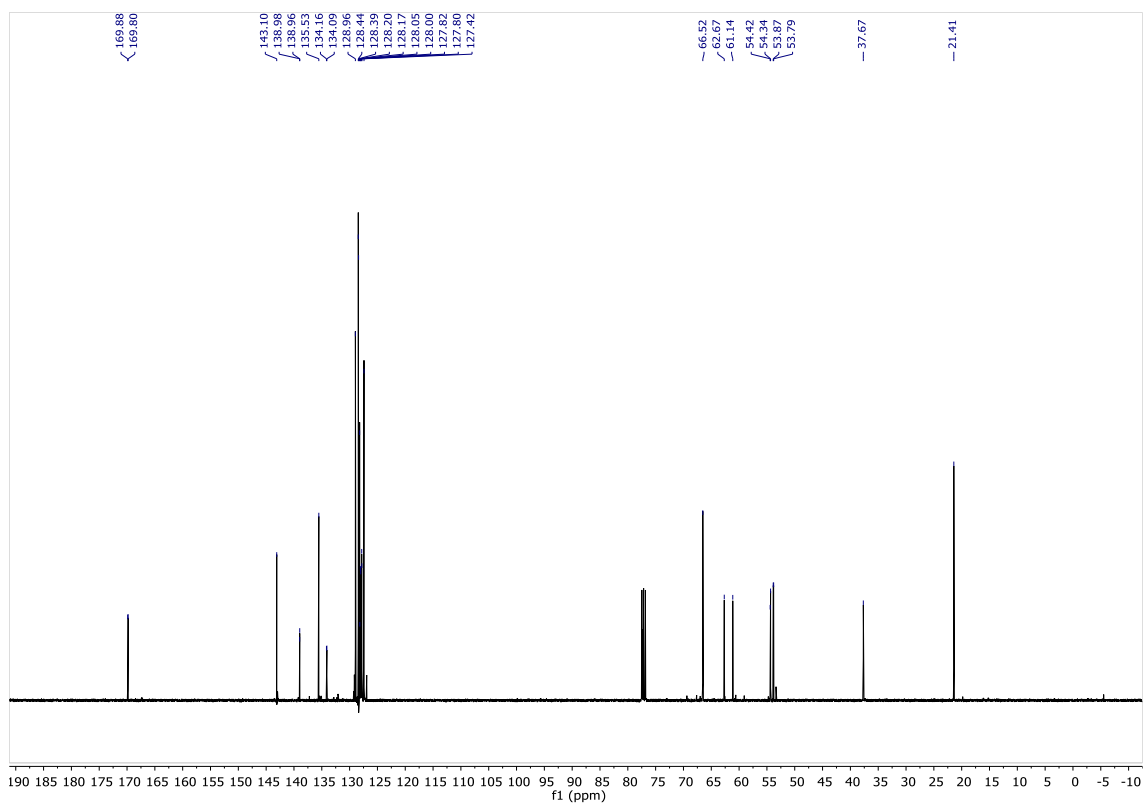

$^{31}\text{P}$  NMR (120 MHz,  $\text{CDCl}_3$ )

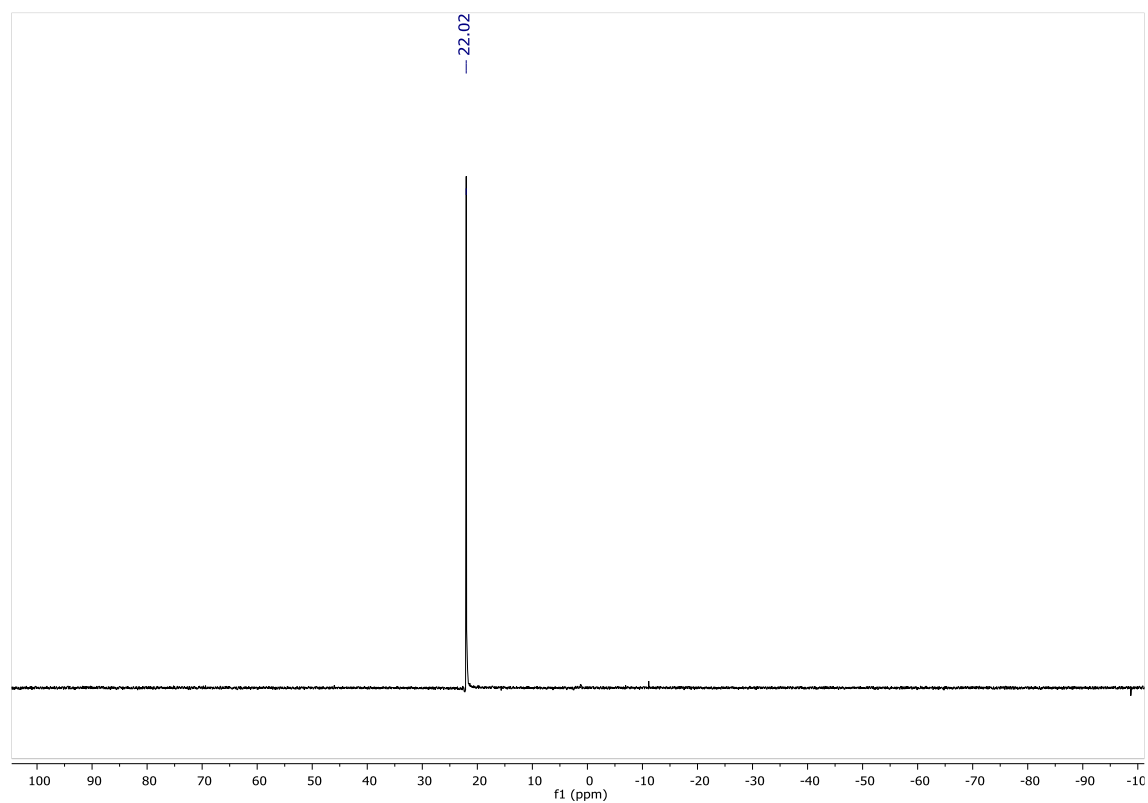

**3-(Dimethoxyphosphoryl)-3-((4-methylphenyl)sulfonamido)-3-phenylpropanoic acid (14)**

$^1\text{H}$  NMR (400 MHz,  $\text{CDCl}_3$ )

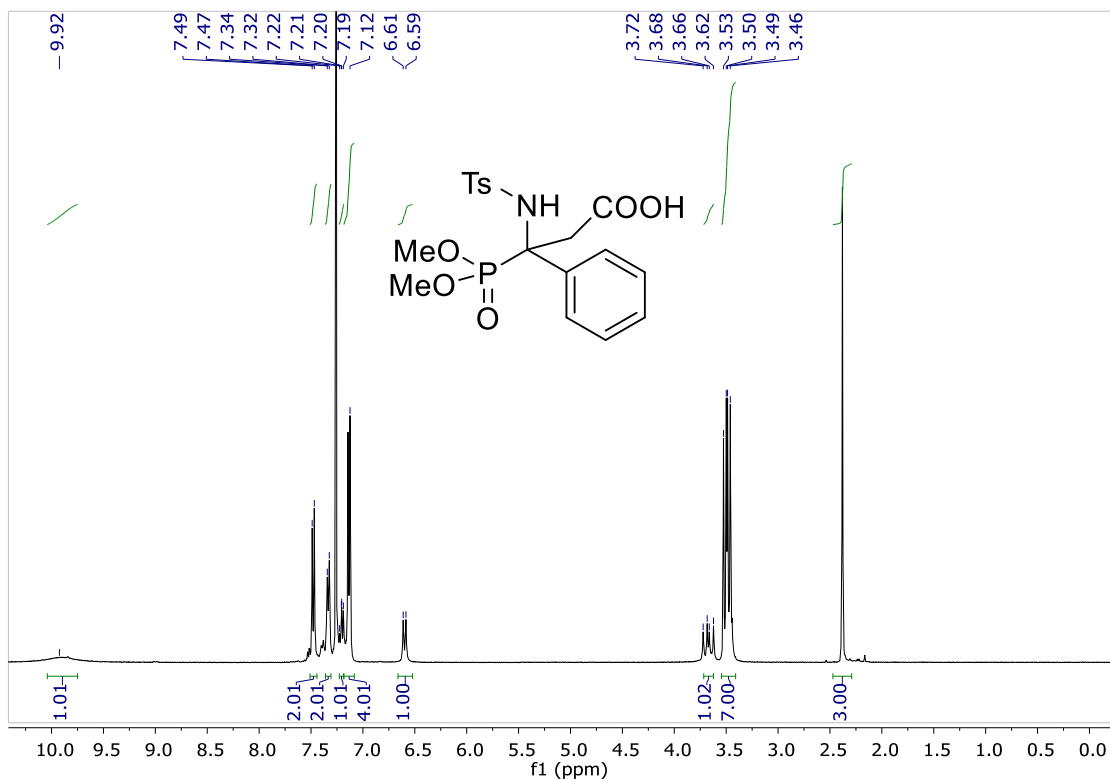

$^{13}\text{C}$  NMR  $\{^1\text{H}\}$  (101 MHz,  $\text{CDCl}_3$ )

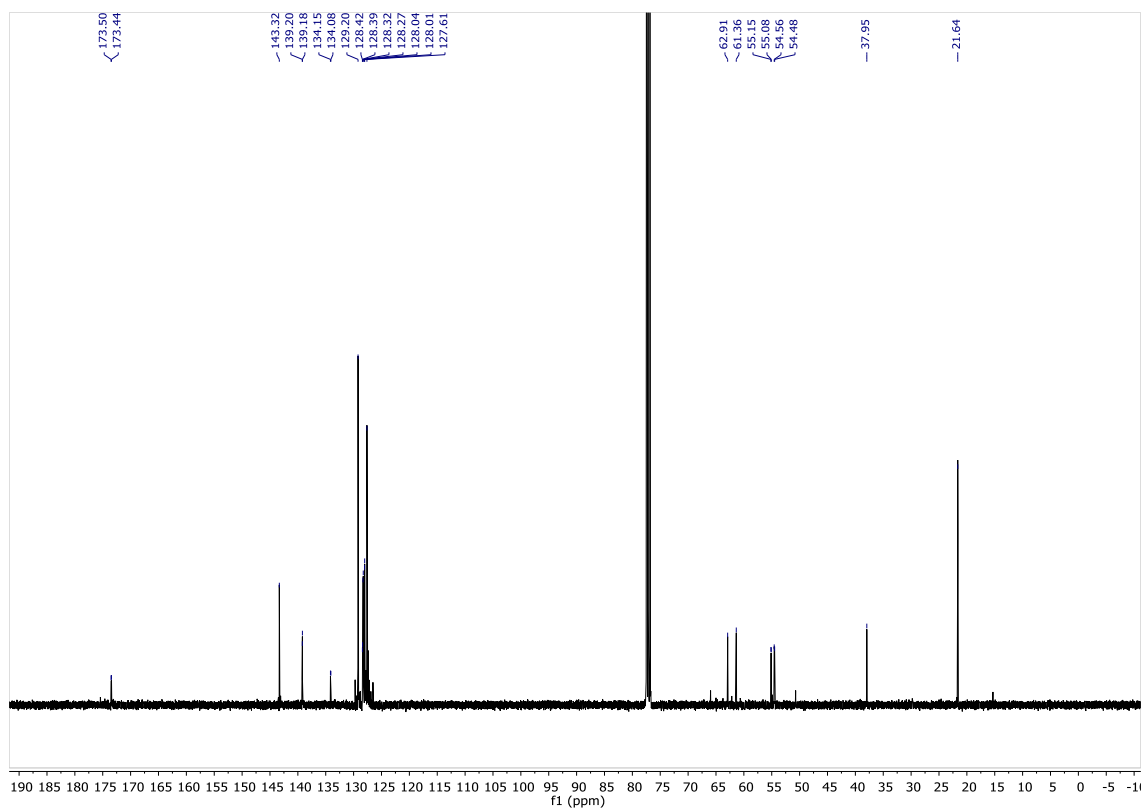



$^{31}\text{P}$  NMR (120 MHz,  $\text{CDCl}_3$ )

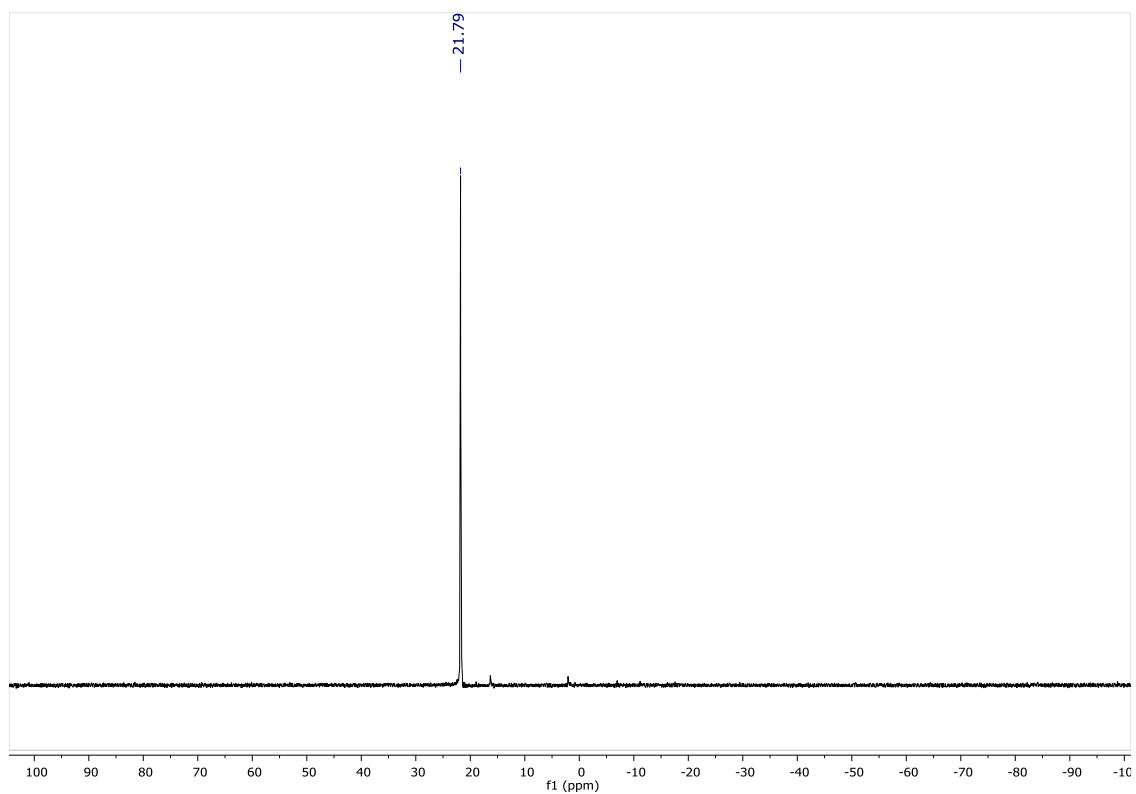

#### 4. $^1\text{H}$ NMR, $^{13}\text{C}$ NMR and $^{31}\text{P}$ NMR spectra of compound 18

##### Dimethyl (1-((4-methylphenyl)sulfonamido)-1-phenylethyl)phosphonate (18)

$^1\text{H}$  NMR (400 MHz,  $\text{CDCl}_3$ )

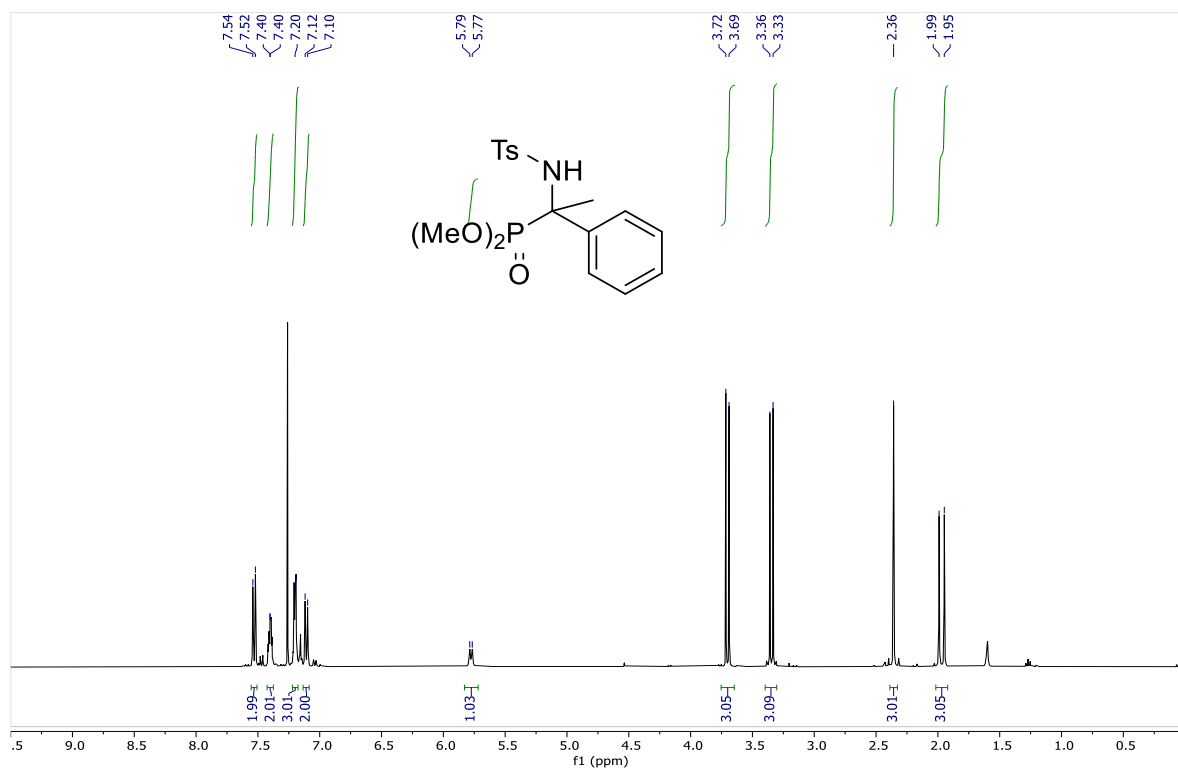

$^{13}\text{C}$  NMR [ $^1\text{H}$ ] (75 MHz,  $\text{CDCl}_3$ )

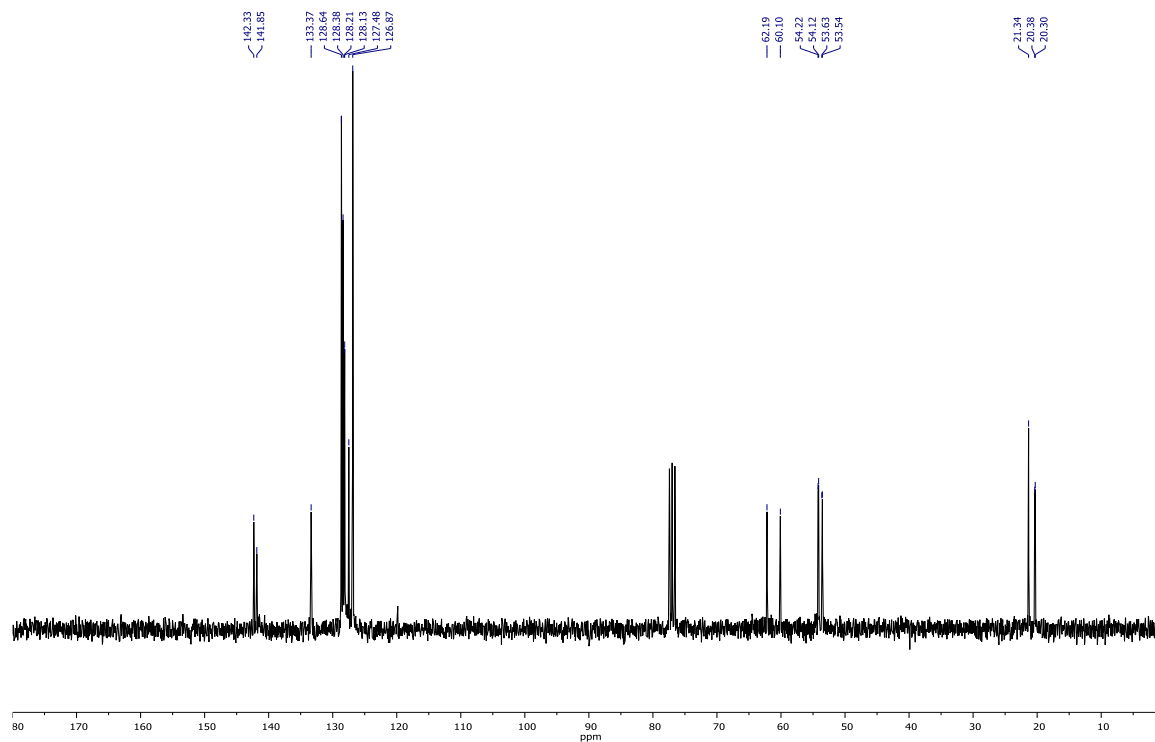

$^{31}\text{P}$  NMR (120 MHz,  $\text{CDCl}_3$ )

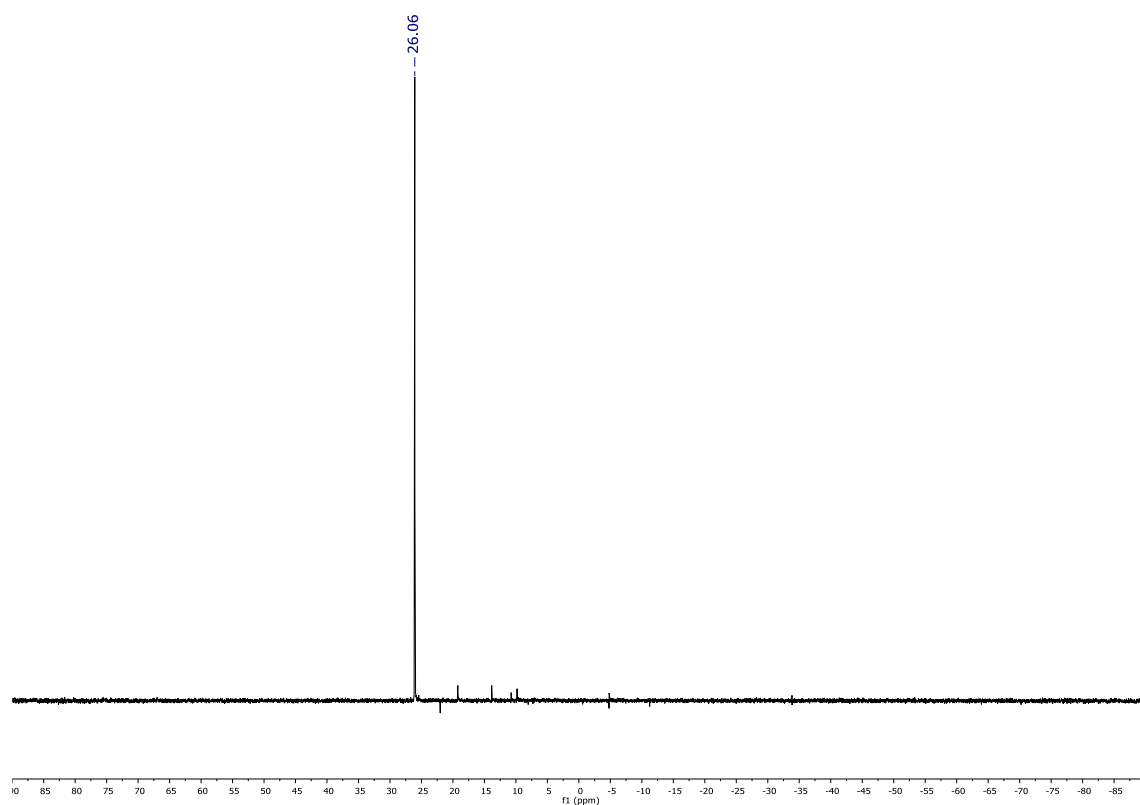

## 5. 2D NMR spectra of compound 7a

2D-COSY NMR  $\{^1\text{H} - ^1\text{H}\}$  (400 MHz,  $\text{CDCl}_3$ )

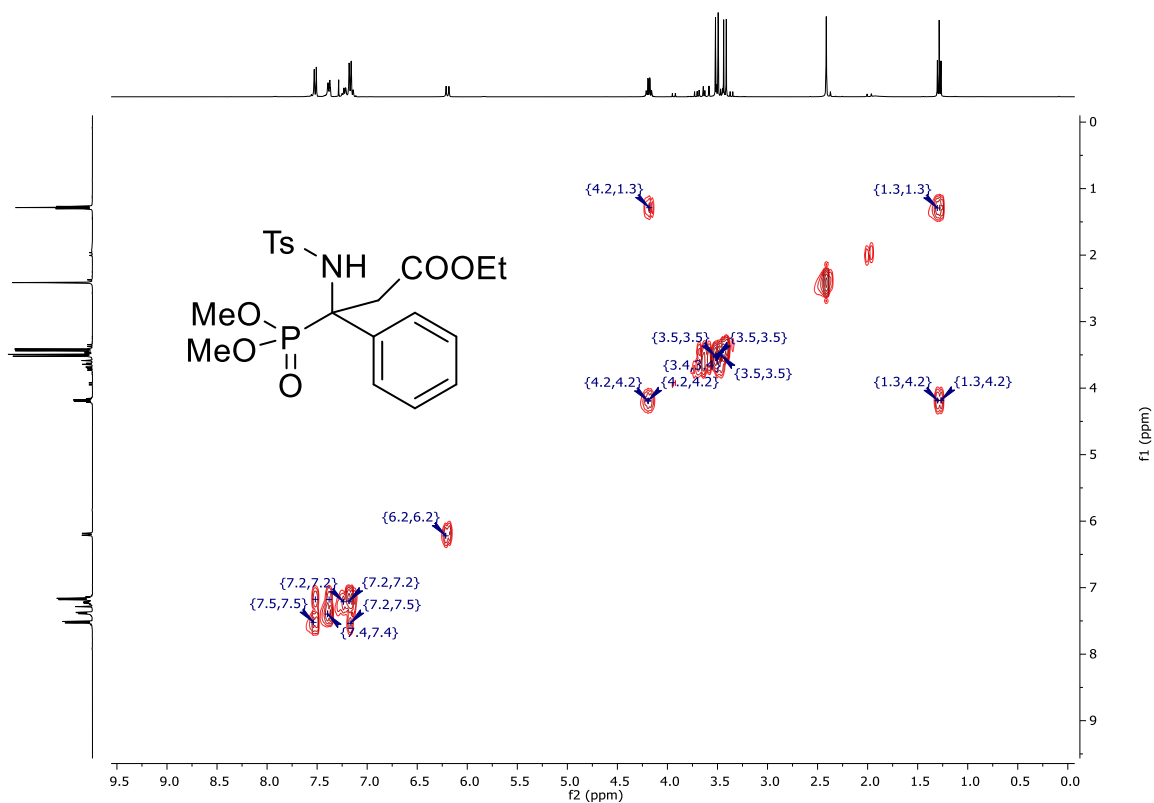

2D-HSQC NMR  $\{^1\text{H} - ^{13}\text{C}\}$  ( $^1\text{H}$ : 400 MHz,  $^{13}\text{C}$ : 101 MHz,  $\text{CDCl}_3$ )

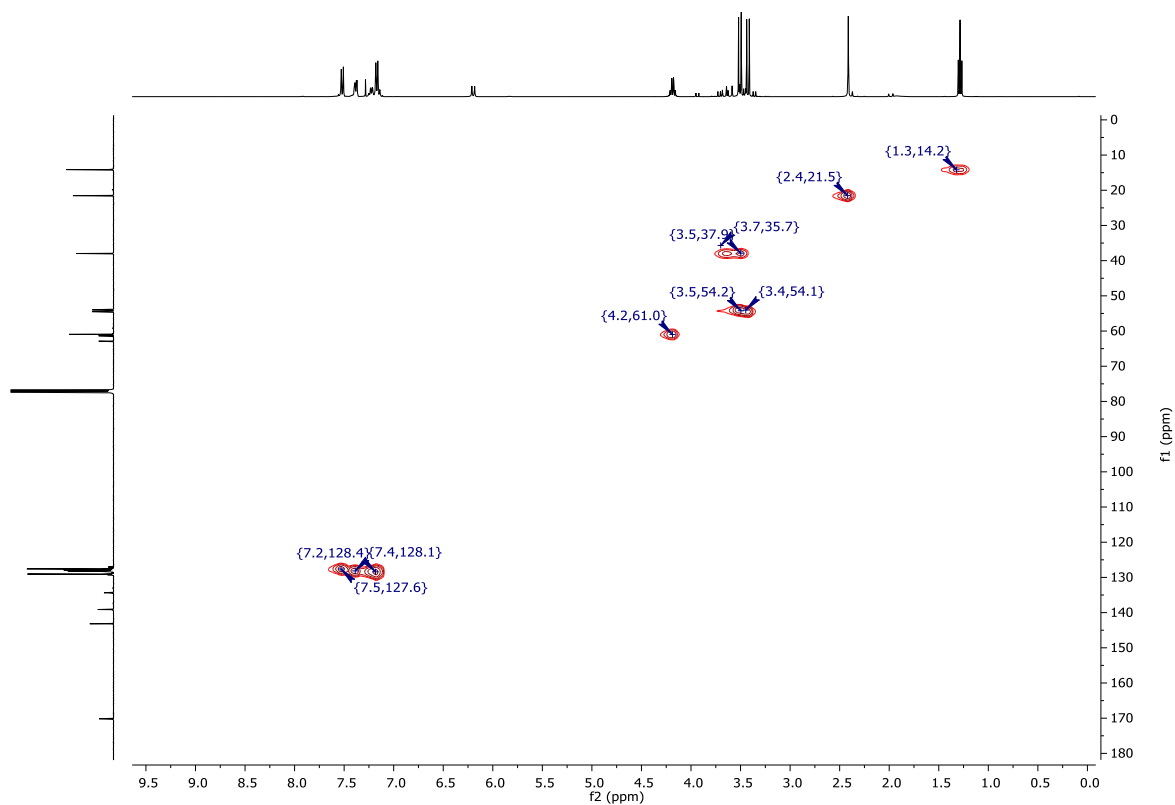

2D-HMBC NMR ( $^1\text{H}$  –  $^{13}\text{C}$ ) ( $^1\text{H}$ : 400 MHz,  $^{13}\text{C}$ : 101 MHz,  $\text{CDCl}_3$ )

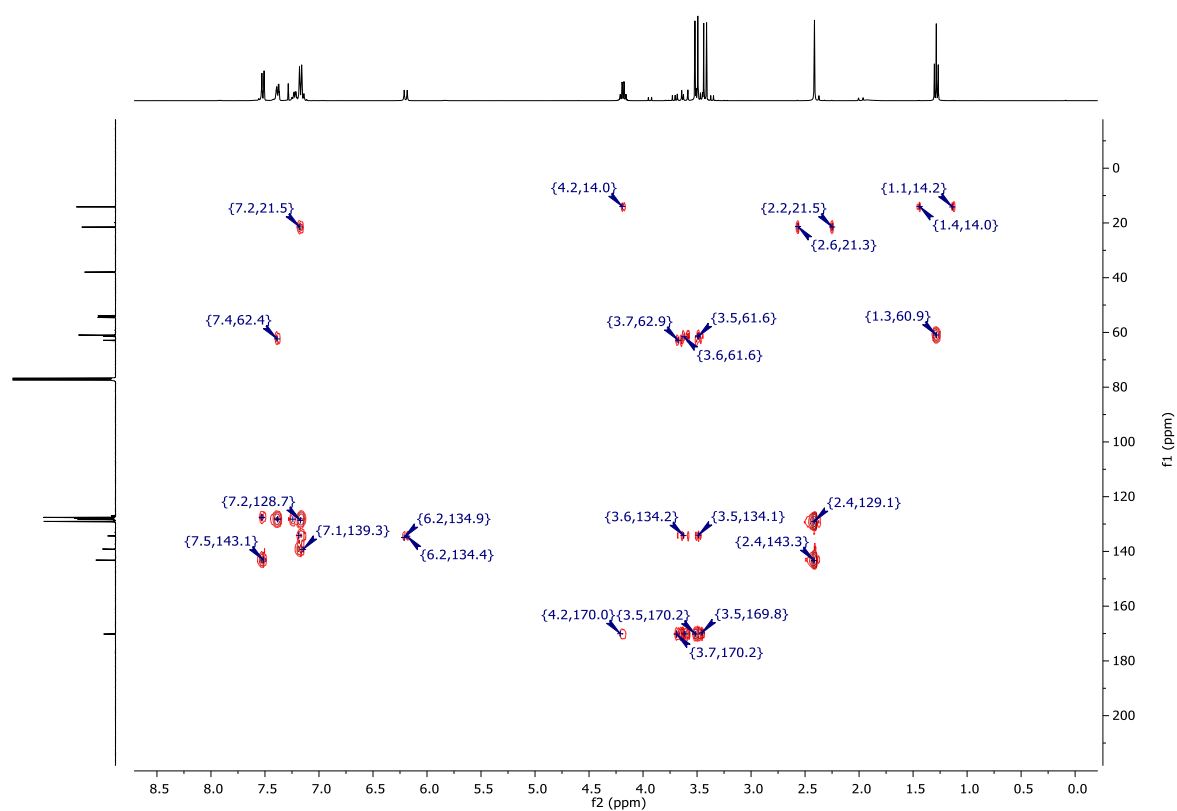

Supplement: s1 [file s1]
